# Supplementary material for: Nudge interventions to reduce unnecessary antibiotic prescribing in primary care: a systematic review
Source: PubMed Central journal article supplement — BMJ Open. 2023 Jan 18;13(1):e062688. doi: 10.1136/bmjopen-2022-062688 (PMC9853249; doi:10.1136/bmjopen-2022-062688), 2023-01-18
Supplement: bmjopen-2022-062688.draft_revisions.pdf [file bmjopen-2022-062688.draft_revisions.pdf]

# BMJ Open

BMJ Open is committed to open peer review. As part of this commitment we make the peer review history of every article we publish publicly available.

When an article is published we post the peer reviewers' comments and the authors' responses online. We also post the versions of the paper that were used during peer review. These are the versions that the peer review comments apply to.

The versions of the paper that follow are the versions that were submitted during the peer review process. They are not the versions of record or the final published versions. They should not be cited or distributed as the published version of this manuscript.

BMJ Open is an open access journal and the full, final, typeset and author-corrected version of record of the manuscript is available on our site with no access controls, subscription charges or pay-per-view fees (<http://bmjopen.bmj.com>).

If you have any questions on BMJ Open's open peer review process please email [info.bmjopen@bmj.com](mailto:info.bmjopen@bmj.com)

# BMJ Open

## Nudge interventions to reduce unnecessary antibiotic prescribing in primary care: a systematic review

|                               |                                                                                                                                                                                                                                                                                                |
|-------------------------------|------------------------------------------------------------------------------------------------------------------------------------------------------------------------------------------------------------------------------------------------------------------------------------------------|
| Journal:                      | <i>BMJ Open</i>                                                                                                                                                                                                                                                                                |
| Manuscript ID                 | bmjopen-2022-062688                                                                                                                                                                                                                                                                            |
| Article Type:                 | Original research                                                                                                                                                                                                                                                                              |
| Date Submitted by the Author: | 08-Mar-2022                                                                                                                                                                                                                                                                                    |
| Complete List of Authors:     | Raban, Magdalena; Macquarie University<br>Gonzalez, Gabriela; Macquarie University<br>Nguyen, A; Macquarie University; St Vincent's Clinical School<br>Newell, Ben; UNSW<br>Li, Ling; Macquarie University<br>Seaman, Karla ; Macquarie University<br>Westbrook, Johanna; Macquarie University |
| Keywords:                     | Quality in health care < HEALTH SERVICES ADMINISTRATION & MANAGEMENT, Public health < INFECTIOUS DISEASES, PRIMARY CARE, Respiratory infections < THORACIC MEDICINE                                                                                                                            |
|                               |                                                                                                                                                                                                                                                                                                |

SCHOLARONE™  
Manuscripts

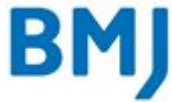

I, the Submitting Author has the right to grant and does grant on behalf of all authors of the Work (as defined in the below author licence), an exclusive licence and/or a non-exclusive licence for contributions from authors who are: i) UK Crown employees; ii) where BMJ has agreed a CC-BY licence shall apply, and/or iii) in accordance with the terms applicable for US Federal Government officers or employees acting as part of their official duties; on a worldwide, perpetual, irrevocable, royalty-free basis to BMJ Publishing Group Ltd ("BMJ") its licensees and where the relevant Journal is co-owned by BMJ to the co-owners of the Journal, to publish the Work in this journal and any other BMJ products and to exploit all rights, as set out in our [licence](#).

The Submitting Author accepts and understands that any supply made under these terms is made by BMJ to the Submitting Author unless you are acting as an employee on behalf of your employer or a postgraduate student of an affiliated institution which is paying any applicable article publishing charge ("APC") for Open Access articles. Where the Submitting Author wishes to make the Work available on an Open Access basis (and intends to pay the relevant APC), the terms of reuse of such Open Access shall be governed by a Creative Commons licence – details of these licences and which [Creative Commons](#) licence will apply to this Work are set out in our licence referred to above.

Other than as permitted in any relevant BMJ Author's Self Archiving Policies, I confirm this Work has not been accepted for publication elsewhere, is not being considered for publication elsewhere and does not duplicate material already published. I confirm all authors consent to publication of this Work and authorise the granting of this licence.

1  
2  
3  
4 **Nudge interventions to reduce unnecessary antibiotic prescribing in primary care: a**  
5  
6 **systematic review**  
7  
8  
9

10  
11 Magdalena Z. Raban<sup>1\*</sup>, Gabriela Gonzalez<sup>1</sup>, Amy D. Nguyen<sup>1,2</sup>, Ben R. Newell<sup>3</sup>, Ling Li<sup>1</sup>,  
12  
13 Karla Seaman<sup>1</sup>, Johanna I Westbrook<sup>1</sup>  
14  
15

16  
17 <sup>1</sup>Centre for Health Systems and Safety Research, Australian Institute of Health Innovation,  
18 Macquarie University, Sydney, Australia.  
19

20 <sup>2</sup>St Vincent's Clinical School, UNSW Medicine, UNSW Sydney, NSW, Australia  
21

22 <sup>3</sup>School of Psychology, UNSW, Sydney, Australia.  
23  
24  
25

26  
27 \*Corresponding author:  
28

29 Dr Magdalena Raban, Senior Research Fellow  
30 Centre for Health Systems and Safety Research, Australian Institute of Health Innovation,  
31 Macquarie University, Sydney, Australia.  
32 [magda.raban@mq.edu.au](mailto:magda.raban@mq.edu.au)  
33  
34  
35  
36  
37  
38  
39  
40  
41  
42  
43  
44  
45  
46  
47  
48  
49  
50  
51  
52  
53  
54  
55  
56  
57  
58  
59  
60

## ABSTRACT

### Objectives

Antibiotic prescribing in primary care contributes significantly to antibiotic overuse. Nudge interventions alter the decision-making environment to achieve behaviour change without restricting options. Our objectives were to conduct a systematic review to examine the types of nudge interventions used to reduce unnecessary antibiotic prescribing in primary care, and their effects on prescribing.

### Methods

Medline, Embase and grey literature were searched for randomised trials or regression discontinuity studies. Risk of bias was assessed independently by two researchers. Vote counting was applied to synthesise effects on overall antibiotic prescribing. Effects of social norm nudges were examined for features that may enhance effectiveness.

### Results

Nineteen studies were included, testing 23 nudge interventions. Four studies were rated as having a high risk of bias, nine as moderate risk of bias, and six as at low risk. Overall, 78.3% (n=23, 95% CI: 58.1, 90.3) of the nudges evaluated reported a reduction in overall antibiotic prescribing rates. Social norm feedback was the most frequently applied nudge (n=17), with 76.5% (n=13; 95% CI: 52.7, 90.4) of these studies reporting a reduction in antibiotic prescribing. Other nudge strategies applied were changing option consequences (n=3; with 2 reporting a reduction), providing reminders (n=2; 1 reporting a reduction), and facilitating commitment (n=1; reporting a reduction). Social norm nudges considered features

1  
2  
3 such as who to target, use of a respected authority for messaging, and the frequency of  
4  
5 feedback, to increase effectiveness. Physicians with the lowest rates of antibiotic prescribing  
6  
7 were used as the comparison point in effective social norm nudges.  
8  
9  
10

## 11 12 **Conclusions**

13  
14 Nudge interventions are effective for improving antibiotic prescribing in primary care.

15  
16 Expanding the use of nudge interventions beyond social norm nudges could reap further  
17  
18 improvements in antibiotic prescribing practices. Policy makers and managers need to be  
19  
20 mindful how social norm nudges are implemented to enhance intervention effects.  
21  
22  
23

## 24 25 **STRENGTHS AND LIMITATIONS**

- 26  
27 • Nudges are potentially useful interventions to influence clinical decisions so that they align with  
28  
29 guidelines; however their effects can vary.
- 30  
31 • This systematic review describes the types of nudges evaluated and their reported effects on  
32  
33 antibiotic prescribing in primary care.
- 34  
35 • A strength of the study is the broad search strategy with the assessment of whether an intervention  
36  
37 was a nudge at the full-text stage.
- 38  
39 • We were not able to synthesise results with meta-analysis due to the differences in outcome  
40  
41 measures reported.  
42  
43  
44  
45

## 46 47 **KEYWORDS**

48 Antimicrobial Stewardship; Primary Health Care; General Practice; Clinical Decision-  
49  
50 Making; Quality of Health Care; Economics, Behavioural; Psychology; Systematic Review;  
51  
52  
53  
54  
55  
56  
57  
58  
59  
60

## INTRODUCTION

Antimicrobial resistance is one of the most pressing challenges to global health [1]. Overuse and inappropriate use of antibiotics is a major contributor to the rise of antimicrobial resistance, and yet, between 2000 and 2010 global antibiotic consumption rose by 35% [2]. Concerningly, global per-capita consumption of antibiotics flagged by the World Health Organization (WHO) as having high resistance potential (Watch category) [3] rose by 90.9% between 2000 and 2015 [4]. Primary care accounts for the majority of antibiotic use, and rates of inappropriate use are estimated to be high [5-7]. For example, the majority of upper respiratory tract infections do not benefit from antibiotic treatment, particularly when weighed against the rates of adverse effects, however, antibiotics continue to be prescribed [5, 8, 9].

Efforts to reduce antibiotic prescribing in primary care have predominantly focused on the use of point-of-care testing, shared decision-making, and education strategies aimed at physicians and patients [10-12]. While some of these intervention strategies have been successful in improving antibiotic prescribing, they can be resource intensive, and in some cases only provide marginal reductions in antibiotic prescribing [10-12]. Furthermore, these intervention strategies rarely take account of how cues in the environment, unrelated to clinician knowledge or access to resources such as information or tests, can influence decision-making.

The field of behavioural economics has generated a collection of approaches, called ‘nudges’, that involve subtle changes in the decision-making environment, or choice architecture, to guide people towards a specific decision or behaviour. Nudge interventions are typically simple and low-cost interventions, and thus are attractive to healthcare managers and policy

1  
2  
3 makers. Furthermore, they do not restrict choices or penalise ‘unfavourable’ choices, thus  
4  
5 preserving an individual’s autonomy in the decision-making process.  
6  
7  
8  
9

10 Nudge interventions have similarities to traditional behaviour change techniques applied in  
11 health services and public health.[13, 14] For example, audit and feedback has long been  
12 applied in health service interventions and has similarities to social norm feedback nudges.  
13  
14 However, audit and feedback may not necessarily include a comparison to the performance  
15 of peers, the essential component that would make it a nudge.[15, 16] Furthermore, social  
16 norm feedback nudges tend to target ‘underperformers’, as evidence from psychology has  
17 demonstrated a ‘boomerang’ effect; i.e. that high performers drop their performance toward  
18 the group mean (beyond that expected due to regression toward the mean). However, audit  
19 and feedback interventions used in health services may not take performance into account  
20 when deciding on who should receive feedback. Thus, there can be nuanced differences in  
21 the techniques from each of these paradigms.  
22  
23  
24  
25  
26  
27  
28  
29  
30  
31  
32  
33  
34  
35  
36  
37

38 Nudge interventions have been successfully implemented in fields other than health [17], and  
39 the evidence base for their use in influencing consumers’ health-related behaviours is  
40 growing [18, 19]. However, while the use of nudge interventions in specific areas of health  
41 services and to influence clinical decision making is increasing,[17, 20] there is emerging  
42 evidence that the effect of nudges can vary depending on the context in which they are  
43 applied, as well as the type of nudge implemented. Against this background, our aim was to  
44 explore the use of nudge interventions and their effectiveness to improve antibiotic  
45 prescribing in primary care, and to draw out lessons to inform future directions for nudge  
46 intervention design and testing in healthcare. Our specific objectives were to describe the  
47  
48  
49  
50  
51  
52  
53  
54  
55  
56  
57  
58  
59  
60



1  
2  
3 types of nudge interventions trialled to date, their key features, and their effects on the rates  
4  
5 of antibiotic prescribing overall.  
6  
7  
8  
9

## 10 11 **METHODS** 12

13  
14 This systematic review is reported in accordance with the Preferred Reporting Items for  
15  
16 Systematic Reviews and Meta-Analyses (PRISMA) statement (Supplementary file 1) [21].  
17  
18  
19  
20  
21  
22  
23  
24

### 25 **Information sources and search strategy** 26

27  
28 The databases MEDLINE (via Ovid and PubMed) and Embase were searched for original  
29  
30 research articles reporting on randomised trials or regression discontinuity studies of  
31  
32 interventions to improve antibiotic prescribing in primary care, published in English in the  
33  
34 last 20 years. Though the behavioural economics term ‘nudge’ was proposed in 2008, many  
35  
36 of the interventions now termed ‘nudges’ have been applied to influence behaviour prior to  
37  
38 the emergence of this term. Therefore, we did not exclude articles published before 2008 if  
39  
40 the interventions met the criteria for a nudge intervention, and our search strategy did not  
41  
42 include ‘nudges’ as a theme. Instead, our search strategy covered three themes: antibiotics  
43  
44 AND primary care AND intervention study designs. The reference lists of included studies  
45  
46 were hand searched for relevant citations. Websites of government nudge units and other  
47  
48  
49  
50  
51  
52  
53  
54  
55  
56  
57  
58  
59  
60

1  
2  
3 organisations working to apply and test nudge theory were also searched for grey literature of  
4  
5  
6  
7 relevance. Searches were carried out in April 2021. The full search strategy is presented in  
8  
9  
10 Supplementary file 2.  
11  
12  
13  
14  
15  
16

### 17 **Eligibility criteria**

18  
19  
20 Studies conducted in primary care facilities, general and family practices were included.  
21  
22

23  
24 Studies in hospital wards or in long-term care were excluded. The intervention tested had to  
25  
26  
27 fall under the broad definition of a nudge proposed by Thaler and Sunstein: “*A nudge... is*  
28  
29  
30 *any aspect of the choice architecture that alters people’s behaviour in a predictable way*  
31  
32 *without forbidding any options or significantly changing their economic incentives. To count*  
33  
34 *as a mere nudge, the intervention must be easy and cheap to avoid*” [22]. For further  
35  
36  
37 guidance on whether the intervention used qualified as a nudge, we used a taxonomy of  
38  
39  
40 choice architecture techniques which focuses on interventions rather than the underlying  
41  
42  
43 cognitive processes of the interventions [23]. Interventions involving education, providing  
44  
45  
46 physicians with access to guidelines, passive decision support tools the clinician had to  
47  
48  
49 actively decide to use, and audit and feedback interventions with no social norm comparison  
50  
51  
52 were excluded. Studies evaluating multifaceted interventions that included a nudge strategy  
53  
54  
55  
56  
57  
58 were also excluded as they did not allow evaluation of the impact of the nudge intervention  
59  
60

1  
2  
3 alone. Studies had to evaluate the impact of the intervention on antibiotic prescribing rates or  
4  
5  
6 rates of appropriate antibiotic prescribing to be eligible. Randomised controlled trials and  
7  
8  
9 regression discontinuity studies were included. Interrupted time-series, controlled before-  
10  
11  
12 after, cross-sectional, and before-after studies were excluded as they are at higher risk of bias.  
13  
14  
15  
16  
17  
18  
19

### 20 **Study selection**

21  
22  
23 Titles and abstracts of citations returned from the searches were independently reviewed by at  
24  
25  
26 least two reviewers. At this stage, the reviewers assessed study setting, study design and  
27  
28  
29 outcomes for eligibility. The full-text of all selected citations were then reviewed  
30  
31  
32 independently by two of three authors against all eligibility criteria, including an assessment  
33  
34  
35 of whether the intervention qualified as a nudge using the definitions outlined above.  
36  
37  
38  
39

40 Discrepancies between reviewers were resolved through discussions until consensus was  
41  
42  
43 reached.  
44  
45  
46  
47  
48  
49

### 50 **Data collection and data items**

51  
52  
53 Data extraction and categorisation of interventions was carried out independently by two  
54  
55  
56 reviewers for each study. We extracted data on study characteristics (country, study years,  
57  
58  
59  
60

1  
2  
3  
4 sample size), nudge intervention description, types of infections targeted (e.g. all, respiratory  
5  
6  
7 tract infections [RTIs], urinary tract infections [UTIs]), outcomes, and study results. When  
8  
9  
10 studies reported more than one outcome, we extracted results for the outcome measuring  
11  
12  
13 changes in overall antibiotic use, appropriate antibiotic use, and any outcome defined as the  
14  
15  
16 primary outcome of the study. When a study trialled more than one nudge intervention, or the  
17  
18  
19 same nudge was implemented with differing features, we extracted intervention data for all  
20  
21  
22  
23 nudges.  
24  
25  
26  
27  
28  
29

30 Nudge interventions were classified using a taxonomy of choice architecture techniques  
31  
32  
33 (Table 1) [23], and we refer to these as nudge intervention categories. Since social norm  
34  
35  
36 feedback nudge interventions are a frequent behaviour change technique in healthcare, often  
37  
38  
39 termed audit and feedback, but are implemented with varying features, we extracted details of  
40  
41  
42  
43 the implementation. We recorded whether a social norm feedback nudge targeted high  
44  
45  
46 antibiotic prescribers or all physicians; the frequency of feedback; whether feedback was  
47  
48  
49 based on prescribing data for practices or individual physicians; the mode of intervention  
50  
51  
52  
53 delivery (e.g. letter, email); whether a graphic representation of data was included; and the  
54  
55  
56  
57 types of supporting information provided in addition to the social norm feedback.  
58  
59  
60

Table 1: Taxonomy of choice architecture techniques with implementation examples[23]

| Category                | Technique                                  | Technique examples                                                                                                                  |
|-------------------------|--------------------------------------------|-------------------------------------------------------------------------------------------------------------------------------------|
| A. Decision information | A1. Translate information                  | <ul style="list-style-type: none"> <li>Reframe information</li> <li>Simplify information</li> </ul>                                 |
|                         | A2. Make information visible               | <ul style="list-style-type: none"> <li>Provide real-time feedback</li> <li>Make external information visible</li> </ul>             |
|                         | A3. Provide social reference point         | <ul style="list-style-type: none"> <li>Refer to descriptive norm (social norm feedback)</li> <li>Refer to opinion leader</li> </ul> |
| B. Decision structure   | B1. Change choice defaults                 | <ul style="list-style-type: none"> <li>Set no-action default</li> <li>Use prompted choice</li> </ul>                                |
|                         | B2. Change option-related effort           | <ul style="list-style-type: none"> <li>Increase/decrease physical effort</li> <li>Increase/decrease financial effort</li> </ul>     |
|                         | B3. Change range or composition of options | <ul style="list-style-type: none"> <li>Change categories of options</li> <li>Change grouping of options</li> </ul>                  |
|                         | B4. Change option consequences             | <ul style="list-style-type: none"> <li>Connect decision to benefit or cost</li> <li>Change social consequences</li> </ul>           |
| C. Decision assistance  | C1. Provide reminders                      | <ul style="list-style-type: none"> <li>Make information more or less salient</li> </ul>                                             |
|                         | C2. Facilitate commitment                  | <ul style="list-style-type: none"> <li>Support self-commitment/public commitment</li> </ul>                                         |

### Assessment of risk of bias in included studies

The risk of bias of each study was assessed using the Cochrane Effective Practice and

Organisation of Care group's tool for studies with a separate control group [24]. Each study

was independently assessed by two authors against each of the nine criteria assigning a score

1  
2  
3 of either low risk, high risk, or unclear risk of bias. Discrepancies were resolved through  
4  
5  
6  
7 discussion. A summary assessment of the overall risk of bias was allocated to each study as  
8  
9  
10 follows: *low risk of bias* when all criteria were scored 'low', *medium risk of bias* when one  
11  
12  
13 or two criteria were scored 'unclear' or 'high' risk, and *high risk* when more than two criteria  
14  
15  
16 scored 'unclear' or 'high' [25].  
17  
18  
19  
20  
21  
22

### 23 **Synthesis of results**

24  
25  
26  
27 Inconsistencies in the outcomes and data reported in the studies precluded meta-analysis.  
28  
29

30 Thus, we applied vote counting to summarise results for each category of nudge intervention  
31  
32 and for features of social norm feedback nudges.[26] Vote counting allows a comparison of  
33  
34 the number of effects reporting a benefit to the number that showed no benefit. It is the  
35  
36 recommended method by Cochrane for summarising studies when meta-analysis or other  
37  
38 quantitative methods are not able to be applied.[26] For each nudge intervention, we recorded  
39  
40 whether the study demonstrated a reduction or no change in overall antibiotic prescribing  
41  
42 compared to controls. As per the Cochrane Handbook, the statistical significance of the effect  
43  
44 was not taken into account, so as not to erroneously conclude that underpowered studies had  
45  
46  
47  
48  
49  
50  
51  
52  
53  
54  
55  
56  
57  
58  
59  
60 no effect. For studies with multiple study outcomes, we only considered the effect on overall

1  
2  
3 antibiotic prescribing. The percentage of interventions with a reduction in overall antibiotic  
4  
5  
6  
7 prescribing was calculated for all nudge interventions and social norm feedback nudges.  
8  
9

10 Sensitivity analyses were conducted removing studies with a high risk of bias. Confidence  
11  
12  
13 intervals for proportions were calculated using the Wilson method. Effect sizes from studies  
14  
15  
16  
17 were summarised narratively by reporting the range of change for overall antibiotic  
18  
19  
20 prescribing outcomes.  
21  
22  
23  
24  
25  
26

27 We used harvest plots to graphically summarise the vote counting results.[27] In a harvest  
28  
29  
30 plot, each mark represents a study or intervention. We used the position of the mark to  
31  
32  
33 indicate whether the intervention effect (reduction or no change in overall antibiotic  
34  
35  
36 prescribing) and the size of the mark to indicate the risk of bias of the study (low risk studies  
37  
38  
39 having a larger mark). Harvest plots were created for all nudge interventions by nudge  
40  
41  
42 category, and for social norm nudges by whether the intervention targeted high antibiotic  
43  
44  
45 prescribers or all prescribers, the frequency of feedback (once or more than once) and  
46  
47  
48 whether the comparison group was the average or above average performers. The  
49  
50  
51 stratification of the social norm nudge interventions by these features aimed to examine if  
52  
53  
54 there was evidence supporting one implementation strategy over another. Lastly, results from  
55  
56  
57  
58  
59  
60

1  
2  
3 studies which directly compared different nudge interventions or implementation strategies or  
4  
5  
6  
7 examined intervention effects over time or on different sub-groups were described  
8  
9  
10 narratively.

### 17 **Public and Patient Involvement**

18  
19  
20 Patients or the public were not involved.  
21  
22  
23  
24  
25  
26

## 27 **RESULTS**

28  
29  
30 Nineteen studies were assessed as eligible for inclusion (Figure 1) [28-43]. Table 2 presents  
31  
32  
33 study characteristics. The majority of studies were conducted in Europe (n=8) [30, 32-35, 41,  
34  
35  
36 42], six in the United States [31, 36-38, 40], two in Australia [29, 39], two in China [43], and  
37  
38  
39 one in Sudan [28]. Seventeen studies were randomised controlled trials and two were  
40  
41  
42 regression discontinuity studies [30, 41]. Interventions were aimed at improving antibiotic  
43  
44  
45 use for all types of infections in nine studies [28-30, 32, 33, 39, 41], RTIs in eight studies [31,  
46  
47  
48 36-38, 40, 42, 43], UTIs in one study [35], and both RTIs and UTIs in one study [34].  
49  
50  
51  
52  
53  
54  
55  
56

### 57 **Risk of bias in included studies**

58  
59  
60



1  
2  
3  
4 Four studies were rated as having a high overall risk of bias [28, 31, 35, 40], nine as moderate  
5  
6  
7 risk of bias [29, 30, 34, 37-39, 41, 42], and six as at low risk of bias (Table 2) [32, 33, 36,  
8  
9  
10 43]. Overall scores of meeting risk of bias criteria ranged from 4/9 to 9/9 across studies. No  
11  
12  
13 single criterion was more frequently at high or unclear risk of bias across studies.  
14  
15  
16  
17 Supplementary file 3 shows the risk of bias assessment against each of the criteria for each  
18  
19  
20 study.  
21  
22  
23  
24  
25  
26  
27  
28  
29

### 30 **Description of nudge interventions**

31  
32  
33  
34 Seventeen studies evaluated one type of nudge intervention and two evaluated three types of  
35  
36  
37 nudge interventions each [37, 38], with a total of 23 nudge interventions evaluated. Three  
38  
39  
40 studies compared different implementation strategies of social norm nudges[29, 36].  
41  
42  
43  
44  
45  
46

47 Social norm feedback nudges ('Decision information' category of nudge interventions; Table  
48  
49  
50 2) were the most common intervention (n=17) evaluated [28-36, 38-42]. Implementation of  
51  
52  
53 social norm feedback varied between studies (Table 3). Social norm feedback was most  
54  
55  
56  
57 commonly: based on prescribing data for individual physicians (n=12) [29, 31, 33, 35, 36,  
58  
59  
60

1  
2  
3 38-42]; provided more than once (n=11) [28, 31, 33-35, 38-40]; sent to all prescribers (n=11)  
4  
5  
6  
7 [28, 31, 34-36, 39, 40, 42] as opposed to the highest prescribers only; and distributed via  
8  
9  
10 letters (n=11) [28-30, 32-34, 36, 39, 41, 42]. Studies also cited application of other  
11  
12  
13 behavioural techniques or considerations in the design of their social norm feedback, such as  
14  
15  
16 the inclusion of actionable advice, addressing the feedback letter from a high profile or  
17  
18  
19 respected individuals, providing positive feedback to high performers (i.e. low prescribers),  
20  
21  
22  
23 and comparison to the mean of the top performers as opposed to the group mean.  
24  
25  
26  
27  
28  
29

30 Three interventions used nudge techniques from the 'Decision structure' category involving  
31  
32  
33 changing option consequences (Table 4) [38, 40, 43]. Three interventions used techniques  
34  
35  
36 from the 'Decision assistance' category (Table 4) involving providing reminders via  
37  
38  
39 suggested alternatives to antibiotic use (n=2) [38, 40] and a statement of public commitment  
40  
41  
42  
43 to reducing antibiotic use in RTIs (n=1) [37].  
44  
45  
46  
47  
48  
49  
50  
51  
52  
53  
54  
55  
56

57 Table 4: Description of nudge and direction of effect on overall antibiotic prescribing in  
58 primary care (other than social norm feedback)  
59  
60

| Nudge category/<br>Author,<br>year                     | Type of nudge             | Mode                     | Description                                                                                                                                                                                                                | Intervention effect* |
|--------------------------------------------------------|---------------------------|--------------------------|----------------------------------------------------------------------------------------------------------------------------------------------------------------------------------------------------------------------------|----------------------|
| <b>Decision structure – change option consequences</b> |                           |                          |                                                                                                                                                                                                                            |                      |
| Meeker, 2016                                           | Accountable justification | Electronic health record | At time of prescribing an antibiotic, physicians were asked to justify their treatment decision in a mandatory free text field. The prompt informed physicians the justification would be visible in the patient's record. | Reduction            |
| Persell, 2016                                          | Accountable justification | Electronic health record | At time of prescribing an antibiotic, physicians were asked to justify their treatment decision in a mandatory free text field. The prompt informed physicians the justification would be visible in the patient's record. | No change            |
| Yang, 2014                                             | Public reporting          | Posters and reports      | Posters with antibiotic prescribing data were publicly displayed in the primary care clinics and reports with the data were sent to clinic managers and local health authorities.                                          | Reduction            |
| <b>Decision assistance – provide reminders</b>         |                           |                          |                                                                                                                                                                                                                            |                      |
| Meeker, 2016                                           | Suggested alternatives    | Electronic health record | At time of prescribing an antibiotic, a pop-up screen stated antibiotics are generally not indicated for the diagnosis and showed a list of alternative treatments.                                                        | Reduction            |
| Persell, 2016                                          | Suggested alternatives    | Electronic health record | At time of prescribing an antibiotic, a computerised order set appeared with treatment alternatives and education materials for the patient.                                                                               | Reduction            |
| <b>Decision assistance – facilitate commitment</b>     |                           |                          |                                                                                                                                                                                                                            |                      |
| Meeker, 2014                                           | Public commitment         | Poster                   | A poster-sized letter signed by physicians and posted in examination rooms indicating commitment to reducing antibiotics for RTIs.                                                                                         | Reduction            |

\*Results of vote counting assessment based on nudge effect on overall antibiotic prescribing

### Effect of nudge interventions on overall antibiotic prescribing rates

Of the 23 nudge interventions evaluated, 78.3% (n=17, 95% CI: 58.1, 90.3) showed a reduction in overall antibiotic prescribing rates. Removing studies with a high risk of bias, the percentage of studies showing a reduction in overall antibiotic prescribing was 76.5% (n=12, 95% CI: 52.7, 90.4). Figure 2 shows the distribution of intervention effects by the type of nudge strategy evaluated.

1  
2  
3  
4  
5  
6 Of the seventeen studies evaluating social norm feedback nudges, 76.5% (n=13, 95% CI:  
7  
8  
9 52.7, 90.4) reported a reduction in overall antibiotic prescribing (Figure 2). Removing studies  
10  
11  
12 with a high risk of bias, this percentage was 69.2% (n=9, 95% CI: 42.4, 87.3). Figure 3 shows  
13  
14  
15 social norm nudges stratified by the frequency of feedback, whether they targeted only high  
16  
17  
18 prescribers or all prescribers, and the comparison group. More studies showed a reduction  
19  
20  
21 than no change in overall antibiotic prescribing irrespective of the frequency of feedback and  
22  
23  
24 who was targeted by the intervention. However, only half of the studies that used the mean  
25  
26  
27 antibiotic prescribing of the group as the comparison reported a reduction in antibiotic  
28  
29  
30 prescribing, with the other half reporting no change.  
31  
32  
33  
34  
35  
36

### 37 **Effect size of nudge interventions on antibiotic prescribing rates**

38  
39  
40 The effect sizes of social norm feedback interventions on the number of antibiotics/1000  
41  
42  
43 consultations (n=3) ranged from no change [39] to a reduction of 13.6% (95% CI: 16.6, 10.6)  
44  
45  
46 at 6-months post-intervention [29]; and the number of antibiotic prescriptions/1000 registered  
47  
48  
49 population (n=5) from no change [44] to an approximate 5% reduction (-58.7/1000  
50  
51  
52  
53 population [95% CI: 116.7, 0.7]) 12-months post intervention [30].  
54  
55  
56  
57  
58  
59  
60

1  
2  
3  
4 Studies measuring antibiotic prescribing for specific infection types reported absolute  
5  
6  
7 difference effect sizes of -1.2% (95% CI: -10.5, 8.2) [34], -1.7% (p=0.93) [31], and -5.2%  
8  
9  
10 (95% CI: -6.9, -1.6) [38] in the proportion of upper RTI treated with an antibiotic; a relative  
11  
12  
13 decrease of 9.6% (p=0.0004) [35] in inappropriate antibiotic for UTIs, and lower odds of  
14  
15  
16 antibiotic prescribing for RTI (OR: 0.73 (95% CI: 0.53, 0.995)) [40].  
17  
18  
19  
20  
21  
22  
23

24 The effect sizes of the two studies of accountable justification interventions ranged from no  
25  
26  
27 change [40] to a reduction of 7.0 percentage points (95% CI: 9.1, 2.9) [38] in the number of  
28  
29  
30 antibiotics/100 antibiotic inappropriate infections. One study of public reporting showed a  
31  
32  
33 1.93 percentage point reduction (95% CI: -6.61, 2.75) in the percentage of RTI consultations  
34  
35  
36 with an antibiotic, and a 6.97 percentage point (95% CI: -13.9, 0.00) reduction in the  
37  
38  
39 percentage of RTI consultations with >1 antibiotic.  
40  
41  
42  
43  
44  
45  
46  
47  
48  
49  
50  
51  
52  
53

54 Supplementary file 4 provides details of the effects of interventions on outcomes.  
55  
56  
57  
58  
59  
60

#### 54 **Studies comparing the effects of different nudge interventions**

55  
56  
57  
58  
59  
60

1  
2  
3  
4 Two studies compared the impact of three different types of nudge interventions on antibiotic  
5  
6  
7 prescribing for RTIs [38, 40]. One study (with a moderate risk of bias) examined the impact  
8  
9  
10 of nudges on RTI where an antibiotic was not indicated, i.e. antibiotic inappropriate  
11  
12  
13 RTIs.[38] This study reported a reduction in the prescribing of antibiotics for antibiotic  
14  
15  
16 inappropriate RTIs in the physician groups receiving social norm feedback and accountable  
17  
18  
19 justification nudges, and a non-significant reduction in the physician group receiving a  
20  
21  
22 suggested alternatives nudge intervention [38]. The second study (high risk of bias) compared  
23  
24  
25 the same three nudge interventions, and reported a reduction in antibiotic prescribing for all  
26  
27  
28 RTIs for the social norm feedback and suggested alternative nudges, but not in the groups  
29  
30  
31 receiving the accountable justification nudges.[40]  
32  
33  
34  
35  
36  
37  
38  
39  
40  
41 Supplementary file 4 provides details of the impact of interventions on outcomes and their  
42  
43  
44 vote counting results.  
45  
46  
47  
48  
49

### 50 **Social norm nudge effects over time and following repeat messaging**

51  
52  
53 Two studies examined the effect of a single social norm nudge letter sent to high antibiotic  
54  
55  
56 prescribing physicians over time and both reported a diminishing effect on prescribing rates  
57  
58  
59  
60

1  
2  
3 compared to controls over time [29, 30]. In one study, the effect of the intervention was  
4  
5  
6  
7 examined over 12-months after the letter was sent [30]. While there was a significant  
8  
9  
10 reduction in antibiotic prescribing compared to controls in the 12 months after the  
11  
12  
13 intervention, the effect diminished over time, such that the reductions in antibiotic  
14  
15  
16 prescribing rates in the second, third and fourth quarters after the intervention were not  
17  
18  
19 statistically significant. The second study also reported a diminishing effect of the social  
20  
21  
22 norm nudge letter over a 12-month period, but the reduction continued to remain significant  
23  
24  
25 at 12-months after the intervention [29, 45].  
26  
27  
28  
29  
30  
31  
32  
33

34 Two studies examined the impact of repeat social norm feedback interventions over time [33,  
35  
36 41]. In the first study, the effect of quarterly social norm feedback sent to the top 50% of  
37  
38  
39 antibiotic prescribers was assessed for 2 years [33]. While there was no difference in overall  
40  
41  
42 antibiotic prescribing rates in the first and second years of the intervention, there was a  
43  
44  
45 significant reduction in the antibiotic prescribing for children and adolescents in the first year  
46  
47  
48 (-8.6%) and young to middle-aged adults in the second year of the intervention (-4.6%).  
49  
50  
51  
52  
53

54 In the second study, a social norm nudge was first used in 2014 targeting the top 20%  
55  
56  
57 antibiotic prescribers, and due to its success was repeated annually since [41]. The study  
58  
59  
60

1  
2  
3  
4 evaluated whether the intervention reduced antibiotic prescribing by physicians who had  
5  
6  
7 previously received the letter and those that had not. The top 10% of prescribers did not  
8  
9  
10 reduce their prescribing whether or not they had previously been sent a letter. However, the  
11  
12  
13 top 11-20% antibiotic prescribers reduced their antibiotic prescribing even when they had  
14  
15  
16 previously been sent a letter. The authors speculated that the failure of the top 10% to reduce  
17  
18  
19 antibiotic prescribing may have been due to the more forceful message in the communication  
20  
21  
22 they received (i.e. that the great majority (90%) of practices prescribed fewer antibiotics),  
23  
24  
25 resulting in negative attitudes to the message and a lower behavioural intention to reduce  
26  
27  
28 prescribing.  
29  
30  
31  
32  
33  
34  
35  
36

## 37 **DISCUSSION**

38  
39  
40 In this systematic review we have compiled the evidence on the effectiveness of nudge  
41  
42 interventions in reducing antibiotic prescribing in primary care. Overall, 78.3% of studies  
43  
44 reported a reduction in antibiotic prescribing. Social norm feedback was the most frequently  
45  
46 evaluated nudge, and the evidence suggests that performance should be compared to high  
47  
48 performers, rather than the average, to enhance intervention effects. Only four studies  
49  
50 examined nudge strategies other than social norm nudges, such as changing option  
51  
52 consequences, providing reminders and facilitating commitment. Thus, while the evidence  
53  
54 base supports the effectiveness of social norm nudges in this context, further research is  
55  
56  
57  
58  
59  
60



1  
2  
3 needed to evaluate other nudge strategies despite promising results thus far of their  
4  
5 effectiveness.  
6  
7  
8  
9

10 The studies included in this review trialled five different nudges (social norm feedback,  
11 accountable justification, public reporting, suggested alternatives and public commitment)  
12 from four of the nine subcategories of choice architecture techniques described by  
13 Munscher.[23]. Two other broad reviews of nudges targeting health providers reported  
14 identifying a similar number of nudges employed in their included studies, but the types of  
15 nudges applied differed to those that we identified.[20, 46] For example, changing choice  
16 defaults is a frequently applied nudge to guide health care provider behaviour, but was not  
17 used to influence antibiotic prescribing in our review.[20, 46] Another example of a nudge  
18 not applied in studies in our review, but used in other contexts targeting health providers is  
19 changing the framing of information.[20, 46] Thus, there is scope for implementing and  
20 evaluating other nudge techniques in the primary care setting to improve antibiotic use. This  
21 is important since it is currently not clear whether the same nudge applied over more than one  
22 year will continue to have sustained impact.  
23  
24  
25  
26  
27  
28  
29  
30  
31  
32  
33  
34  
35  
36  
37  
38  
39  
40  
41

42 We attempted to elucidate whether features of social norm feedback nudges have a role in  
43 their effectiveness. For example, the behavioural economics literature suggests that social  
44 norm nudges should only be provided to poor performers (i.e. high antibiotic prescribers in  
45 our case).[22] This is because of the 'boomerang effect' that may occur in individuals  
46 performing above average when they are provided social norm feedback confirming their  
47 above average performance, i.e. they reduce their performance. The studies in our review  
48 most frequently provided the social norm feedback to all prescribers (not only high  
49 prescribers) and all but one of these studies showed a reduction in overall antibiotic  
50  
51  
52  
53  
54  
55  
56  
57  
58  
59  
60

1  
2  
3 prescribing. However, the studies providing feedback to all prescribers also predominantly  
4 provided feedback more than once, which may have played a role in the reduction in  
5 antibiotic prescribing. Other factors that may have played a role in the prevention of a  
6  
7  
8  
9  
10 ‘boomerang’ effect in low prescribers, was the way the message was delivered and the  
11 comparison group used in the feedback. For example, one study informed the physicians with  
12 the lowest prescribing that they were a ‘top performer’, whereas the remaining physicians  
13 were informed they were ‘not a top performer’.[38] The psychology literature supports the  
14 use of an injunctive when providing feedback i.e. conveying social approval or disapproval,  
15 as a way to eliminate the ‘boomerang’ effect.[47] The study also compared physicians’  
16 performance to the mean of the lowest decile prescribers, rather than the group mean. In fact,  
17 our results showed that comparison of performance to the group mean was the only feature of  
18 social norm feedback nudges that produced results that were evenly distributed between a  
19 reduction and no change in antibiotic prescribing. However, the studies that used  
20 comparisons to the lowest prescribers or ranked the prescriber against their peers all reported  
21 reductions in antibiotic prescribing.  
22  
23  
24  
25  
26  
27  
28  
29  
30  
31  
32  
33  
34  
35  
36  
37  
38  
39

40 The frequency of feedback may also play a role in social norm nudge effects. In the study  
41 described above that informed prescribers they were a ‘top performer’ or ‘not a top  
42 performer’, feedback was provided on a monthly basis, which allowed physicians to assess  
43 the degree to which they had changed their antibiotic prescribing.[38] This is a different  
44 approach to studies that targeted only the high prescribers, i.e. poor performers. These studies  
45 tended to provide the feedback once, informing the physicians that they prescribed at a higher  
46 rate than e.g. 80% of their peers.[29, 30, 32, 41, 45] The other behavioural feature included in  
47 the studies targeting high prescribers was that the letter was addressed from a high-profile  
48 figure to increase the credibility of the message.[29, 30, 32, 41, 45]  
49  
50  
51  
52  
53  
54  
55  
56  
57  
58  
59  
60

1  
2  
3  
4  
5  
6 It has been suggested that we can also learn from nudges that fail.[14, 48] There were four  
7  
8 studies that implemented a social norm feedback nudge that had no effect on overall  
9  
10 antibiotic prescribing.[33, 34, 39, 44] All four studies had two intervention features in  
11  
12 common. Firstly, the peer comparison used was the mean prescribing rate of the group or in  
13  
14 the case of one study the interquartile range of the group. For those prescribers that were at  
15  
16 the mean prescribing level or marginally below it, this may not have provided enough  
17  
18 motivation to change their behaviour. Furthermore, as mentioned above, the ‘boomerang  
19  
20 effect’ may occur in individuals performing above average. Secondly, the feedback in the  
21  
22 four evaluations of social norm nudges that did not reduce overall prescribing was not  
23  
24 provided from a high-profile or respected figure, which may have reduced the salience of the  
25  
26 message.  
27  
28  
29  
30  
31  
32

33 The literature on audit and feedback interventions in healthcare provides insights into what  
34  
35 features make these interventions more effective, and complement those from the behavioural  
36  
37 economics and psychology literature.[16] A Cochrane review found that feedback is more  
38  
39 likely to be effective when: baseline performance is low; the source is a supervisor or  
40  
41 colleague; the frequency is more than once; it is delivered both verbally and in written  
42  
43 formats; and when feedback includes both targets and an action plan.[15] Many of these  
44  
45 features were included in the social norm nudges we identified in this review. For example,  
46  
47 most of the social norm nudges included information on appropriate antibiotic prescribing in  
48  
49 primary care. Thus, synthesising such evidence from behavioural economics and psychology  
50  
51 is likely to enhance the effectiveness of these interventions.  
52  
53  
54  
55  
56  
57  
58  
59  
60

1  
2  
3 This systematic review has a number of strengths. Firstly, our search strategy was inclusive  
4 of all studies evaluating interventions to improve antibiotic prescribing in primary care. The  
5 selection of studies based on the type of intervention occurred at the full-text screening stage  
6 to ensure that studies not explicitly stating they used nudge techniques were included.  
7  
8 Secondly, we used a comprehensive taxonomy of behavioural architecture techniques,[23]  
9 rather than attempting to ascertain whether the underlying cognitive processes addressed by  
10 the intervention had the features of a nudge. However, we were unable to perform a meta-  
11 analysis or summarise the results quantitatively due to the heterogenous reporting of study  
12 outcomes. Nonetheless, this review has provided practical insights into the use of nudge  
13 interventions to reduce antibiotic use in primary care, and highlighted areas for further  
14 research.  
15  
16  
17  
18  
19  
20  
21  
22  
23  
24  
25  
26  
27  
28  
29  
30

## 31 **CONCLUSIONS**

32  
33 Health systems worldwide continue to struggle to deliver evidence-based care.[49] Nudges  
34 can be used in lieu of, or to augment, more traditional efforts such as education (targeting  
35 clinicians, as well as the public), financial incentives, promotion of guidelines, and changing  
36 models of care. Evaluation of nudges applied in healthcare will play a key role in identifying  
37 interventions suitable for use in different contexts, including primary care, and in further  
38 developing applications of nudge strategies to improve the delivery of effective healthcare  
39 services.  
40  
41  
42  
43  
44  
45  
46  
47  
48  
49  
50

## 51 **FUNDING**

52  
53 This study was funded by a National Health and Medical Research Council (NHMRC)  
54 Partnership Project (2006957). MZR is supported by a NHMRC Early Career Fellowship  
55 (APP1143941). JIW is supported by a NHMRC Elizabeth Blackburn Leadership Investigator  
56  
57  
58  
59  
60

1  
2  
3 Grant (APP1174021). The funding body had no role in the design of the study, data  
4 collection , analysis, interpretation or writing of the manuscript.  
5  
6  
7  
8  
9

## 10 **COMPETING INTERESTS**

11  
12 The authors declare that they have no competing interests.  
13  
14  
15  
16

## 17 **AUTHOR CONTRIBUTIONS**

18  
19 MZR conceived the study with JW and BN. MZR and GG designed the search strategy and  
20 GG ran the searches. MZR, GG and AN screened articles for inclusion with input from BN.  
21  
22 MZR, GG and AN conducted data extraction and quality assessments. LL and KS provided  
23 support for the compilation of results. MZR compiled results and wrote the initial manuscript  
24 draft. All authors contributed to the editorial process of the manuscript and approved the final  
25 manuscript.  
26  
27  
28  
29  
30  
31  
32  
33  
34

## 35 **DATA SHARING STATEMENT**

36 All data is available in the manuscript or Supplementary files.  
37  
38  
39  
40  
41

## 42 **ETHICS APPROVAL**

43 This study does not involve human participants.  
44  
45  
46  
47  
48

49 **WORD COUNT:** 4523  
50  
51

## 52 **REFERENCES**

- 53  
54 1. Jee Y, Carlson J, Rafai E, Musonda K, Huong TTG, Daza P, et al. Antimicrobial  
55 resistance: a threat to global health. *Lancet Infect Dis*. 2018;18(9):939-940.  
56  
57  
58  
59  
60

- 1  
2  
3 2. Van Boeckel TP, Gandra S, Ashok A, Caudron Q, Grenfell BT, Levin SA, et al.  
4  
5 Global antibiotic consumption 2000 to 2010: an analysis of national pharmaceutical  
6  
7 sales data. *Lancet Infect Dis.* 2014;14(8):742-750.  
8  
9
- 10 3. World Health Organization. Model List of Essential Medicines, 21st List. Geneva:  
11  
12 WHO. 2019. Available from:  
13  
14 [https://apps.who.int/iris/bitstream/handle/10665/325771/WHO-MVP-EMP-IAU-](https://apps.who.int/iris/bitstream/handle/10665/325771/WHO-MVP-EMP-IAU-2019.06-eng.pdf?sequence=1&isAllowed=y)  
15  
16 [2019.06-eng.pdf?sequence=1&isAllowed=y](https://apps.who.int/iris/bitstream/handle/10665/325771/WHO-MVP-EMP-IAU-2019.06-eng.pdf?sequence=1&isAllowed=y)  
17  
18
- 19 4. Klein EY, Milkowska-Shibata M, Tseng KK, Sharland M, Gandra S, Pulcini C, et al.  
20  
21 Assessment of WHO antibiotic consumption and access targets in 76 countries, 2000-  
22  
23 15: an analysis of pharmaceutical sales data. *Lancet Infect Dis.* 2020;21(1):107-115.  
24  
25
- 26 5. Arnolda G, Hibbert P, Ting HP, Molloy C, Wiles L, Warwick M, et al. Assessing the  
27  
28 appropriateness of paediatric antibiotic overuse in Australian children: a population-  
29  
30 based sample survey. *BMC Pediatr.* 2020;20(1):185.  
31  
32
- 33 6. Pouwels KB, Dolk FCK, Smith DRM, Robotham JV, Smieszek T. Actual versus  
34  
35 'ideal' antibiotic prescribing for common conditions in English primary care. *J*  
36  
37 *Antimicrob Chemother.* 2018;73(suppl\_2):19-26.  
38  
39
- 40 7. Hay AD. Antibiotic prescribing in primary care. *BMJ.* 2019;364:l780.  
41
- 42 8. Leis JA, Born KB, Theriault G, Ostrow O, Grill A, Johnston KB. Using antibiotics  
43  
44 wisely for respiratory tract infection in the era of covid-19. *BMJ.* 2020;371:m4125.  
45  
46
- 47 9. Lemiengre M, van Driel M, Merenstein D, Liira H, Makela M, De Sutter A.  
48  
49 Antibiotics for sinus infection of short duration in adults. *Cochrane Database of*  
50  
51 *Systematic Reviews.* 2018(9).  
52  
53
- 54 10. Köchling A, Löffler C, Reinsch S, Hornung A, Böhmer F, Altiner A, et al. Reduction  
55  
56 of antibiotic prescriptions for acute respiratory tract infections in primary care: a  
57  
58 systematic review. *Implement Sci.* 2018;13(1):47.  
59  
60

- 1  
2  
3 11. Tonkin-Crine S, Tan P, van Hecke O, Wang K, Roberts N, McCullough A, et al.  
4  
5 Clinician-targeted interventions to influence antibiotic prescribing behaviour for acute  
6  
7 respiratory infections in primary care: an overview of systematic reviews. *Cochrane*  
8  
9 *Database Syst Rev.* 2017;9(9):CD012252.  
10  
11
- 12 12. Vodicka TA, Thompson M, Lucas P, Heneghan C, Blair PS, Buckley DI, et al.  
13  
14 Reducing antibiotic prescribing for children with respiratory tract infections in  
15  
16 primary care: a systematic review. *Br J Gen Pract.* 2013;63(612):e445-54.  
17  
18
- 19 13. Michie S, van Stralen MM, West R. The behaviour change wheel: a new method for  
20  
21 characterising and designing behaviour change interventions. *Implement Sci.*  
22  
23 2011;6:42.  
24  
25
- 26 14. Osman M, McLachlan S, Fenton N, Neil M, Lofstedt R, Meder B. Learning from  
27  
28 behavioural changes that fail. *Trends in Cognitive Sciences.* 2020;24(12):969-980.  
29  
30
- 31 15. Ivers N, Jamtvedt G, Flottorp S, Young JM, Odgaard-Jensen J, French SD, et al.  
32  
33 Audit and feedback: effects on professional practice and healthcare outcomes.  
34  
35 *Cochrane Database of Systematic Reviews.* 2012(6).  
36  
37
- 38 16. Ivers NM, Sales A, Colquhoun H, Michie S, Foy R, Francis JJ, et al. No more  
39  
40 'business as usual' with audit and feedback interventions: towards an agenda for a  
41  
42 reinvigorated intervention. *Implement Sci.* 2014;9:14.  
43  
44
- 45 17. Hummel D, Maedche A. How effective is nudging? A quantitative review on the  
46  
47 effect sizes and limits of empirical nudging studies. *J Behav Exp Econ.* 2019;80:47-  
48  
49 58.  
50  
51
- 52 18. Adam A, Jensen J. What is the effectiveness of obesity related interventions at retail  
53  
54 grocery stores and supermarkets? a systematic review. *BMC Public Health.*  
55  
56 2016;16(1):1247.  
57  
58  
59  
60

- 1  
2  
3 19. Bucher T, Collins C, Rollo ME, McCaffrey TA, De Vlieger N, Van der Bend D, et al.  
4  
5 Nudging consumers towards healthier choices: a systematic review of positional  
6  
7 influences on food choice. *Br J Nutr.* 2016;115(12):2252-2263.  
8  
9
- 10 20. Yoong SL, Hall A, Stacey F, Grady A, Sutherland R, Wyse R, et al. Nudge strategies  
11  
12 to improve healthcare providers' implementation of evidence-based guidelines,  
13  
14 policies and practices: a systematic review of trials included within Cochrane  
15  
16 systematic reviews. *Implement Sci.* 2020;15(1):50.  
17  
18
- 19 21. Moher D, Liberati A, Tetzlaff J, Altman D. Preferred Reporting Items for Systematic  
20  
21 Reviews and Meta-Analyses: The PRISMA Statement. *PLoS Med.*  
22  
23 2009;6(7):e1000097.  
24  
25
- 26 22. Thaler R, Sunstein C, Nudge: Improving decisions about health, wealth, and  
27  
28 happiness. 2009, US: Penguin Putnam Inc.  
29
- 30 23. Münscher R, Vetter M, Scheuerle T. A Review and Taxonomy of Choice Architecture  
31  
32 Techniques. *J Behav Decis Mak.* 2016;29(5):511-524.  
33  
34
- 35 24. Cochrane Effective Practice and Organisation of Care. EPOC resources for review  
36  
37 authors: Suggested risk of bias criteria for EPOC reviews. 2017. Available from:  
38  
39 [https://epoc.cochrane.org/sites/epoc.cochrane.org/files/public/uploads/Resources-for-](https://epoc.cochrane.org/sites/epoc.cochrane.org/files/public/uploads/Resources-for-authors2017/suggested_risk_of_bias_criteria_for_epoc_reviews.pdf)  
40  
41 [authors2017/suggested\\_risk\\_of\\_bias\\_criteria\\_for\\_epoc\\_reviews.pdf](https://epoc.cochrane.org/sites/epoc.cochrane.org/files/public/uploads/Resources-for-authors2017/suggested_risk_of_bias_criteria_for_epoc_reviews.pdf)  
42  
43
- 44 25. Raban MZ, Gasparini C, Li L, Baysari MT, Westbrook JI. Effectiveness of  
45  
46 interventions targeting antibiotic use in long-term aged care facilities: a systematic  
47  
48 review and meta-analysis. *BMJ Open.* 2020;10(1):e028494.  
49  
50
- 51 26. Higgins J, Thomas J, Chandler J, Cumpston M, Li T, Page M, et al., Cochrane  
52  
53 Handbook for Systematic Reviews of Interventions version 6.2 (updated February  
54  
55 2021). 2021, Cochrane.  
56  
57  
58  
59  
60



- 1  
2  
3 27. Ogilvie D, Fayter D, Petticrew M, Sowden A, Thomas S, Whitehead M, et al. The  
4 harvest plot: a method for synthesising evidence about the differential effects of  
5 interventions. *BMC Med Res Methodol*. 2008;8:8.  
6  
7
- 8  
9  
10 28. Awad A, Eltayeb I, Baraka O. Changing antibiotics prescribing practices in health  
11 centers of Khartoum State, Sudan. *Eur J Clin Pharmacol*. 2006;62(2):135-42.  
12  
13
- 14 29. Behavioural Economics Team of the Australian Government (BETA). Nudge vs  
15 Superbugs: A behavioural economics trial to reduce the overprescribing of antibiotics.  
16 Canberra: Department of the Prime Minister and Cabinet. 2018. Available from:  
17 <https://www.health.gov.au/resources/publications/nudge-vs-superbugs>  
18  
19
- 20 30. Bradley D, Allen S, Quinn H, Bradley B, Dolan M. Social norm feedback reduces  
21 primary care antibiotic prescribing in a regression discontinuity study. *J Antimicrob*  
22 *Chemother*. 2019;74:2797–2802.  
23  
24
- 25 31. Gerber J, Prasad P, Ficks A, Localio A, Grundemeier R, Bell L, et al. Effect of an  
26 outpatient antimicrobial stewardship intervention on broad-spectrum antibiotic  
27 prescribing by primary care pediatricians. *JAMA*. 2013;309.  
28  
29
- 30 32. Hallsworth M, Chadborn T, Sallis A, Sanders M, Berry D, Greaves F, et al. Provision  
31 of social norm feedback to high prescribers of antibiotics in general practice: a  
32 pragmatic national randomised controlled trial. *Lancet*. 2016;387(10029):1743-52.  
33  
34
- 35 33. Hemkens L, Saccilotto R, Reyes S, Glinz D, Zumbrunn T, Grolimund O, et al.  
36 Personalized prescription feedback using routinely collected data to reduce antibiotic  
37 use in primary care. *JAMA*. 2017;177(2):176-183.  
38  
39
- 40 34. Hurlimann D, Limacher A, Schabel M, Zanetti G, Berger C, Muhlemann K, et al.  
41 Improvement of antibiotic prescription in outpatient care: a cluster-randomized  
42 intervention study using a sentinel surveillance network of physicians. *J Antimicrob*  
43 *Chemother*. 2015;70:602-608.  
44  
45  
46  
47  
48  
49  
50  
51  
52  
53  
54  
55  
56  
57  
58  
59  
60

- 1  
2  
3 35. Lagerløv P, Loeb M, Andrew M, Hjortdahl P. Improving doctors' prescribing  
4 behaviour through reflection on guidelines and prescription feedback: a randomised  
5 controlled study. *Qual Health Care*. 2000;9(159-165).  
6  
7
- 8  
9  
10 36. Mainous A, Hueston WJ, Love M, Evans M, Finger R. An evaluation of statewide  
11 strategies to reduce antibiotic overuse *Fam Med*. 2000;32(1):22-9.  
12  
13
- 14 37. Meeker D, Knight T, Friedberg M, Linder J, Goldstein N, Fox C, et al. Nudging  
15 guideline-concordant antibiotic prescribing: a randomized clinical trial. *JAMA Intern*  
16 *Med*. 2014;174(3):425-31.  
17  
18
- 19 38. Meeker D, Linder J, Fox C, Friedberg M, Persell S, Goldstein N, et al. Effect of  
20 Behavioral Interventions on Inappropriate Antibiotic Prescribing Among Primary  
21 Care Practices: A Randomized Clinical Trial. *JAMA*. 2016;315(6):562-70.  
22  
23
- 24 39. O'Connell D, Henry D, Tomlins R. Randomised controlled trial of effect of feedback  
25 on general practitioners' prescribing in Australia. *BMJ*. 1999;318.  
26  
27
- 28 40. Persell S, Doctor J, Friedberg M, Meeker D, Friesema E, Cooper A, et al. Behavioral  
29 interventions to reduce inappropriate antibiotic prescribing: a randomized pilot trial.  
30 *BMC Infect Dis*. 2016;16:373.  
31  
32
- 33 41. Ratajczak M, Gold N, Hailstone N, Chadborn T. The effectiveness of repeating a  
34 social norm feedback intervention to high prescribers of antibiotics in general  
35 practice: a national regression discontinuity design. *J Antimicrob Chemother*.  
36 2019;74:3603–3610.  
37  
38
- 39 42. Søndergaard J, Andersen M, Støvring H, Kragstrup J. Mailed prescriber feedback in  
40 addition to a clinical guideline has no impact: a randomised, controlled trial. *Scand J*  
41 *Prim Health Care*. 2003;21:47-51.  
42  
43  
44  
45  
46  
47  
48  
49  
50  
51  
52  
53  
54  
55  
56  
57  
58  
59  
60

- 1  
2  
3  
4  
5  
6  
7  
8  
9  
10  
11  
12  
13  
14  
15  
16  
17  
18  
19  
20  
21  
22  
23  
24  
25  
26  
27  
28  
29  
30  
31  
32  
33  
34  
35  
36  
37  
38  
39  
40  
41  
42  
43  
44  
45  
46  
47  
48  
49  
50  
51  
52  
53  
54  
55  
56  
57  
58  
59  
60
43. Yang L, Liu C, Wang L, Yin X, Zhang X. Public reporting improves antibiotic prescribing for upper respiratory tract infections in primary care: a matched-pair cluster-randomized trial in China. *Health Res Policy Syst.* 2014;12(61).
  44. Curtis H, Bacon S, Croker R, Walker A, Perera R, Hallsworth M, et al. Evaluating the impact of a very low-cost intervention to increase practices' engagement with data and change prescribing behaviour: a randomized trial in English primary care. *Fam Pract.* 2021.
  45. Behavioural Economics Team of the Australian Government (BETA). *Nudge vs Superbugs: 12 months on.* Canberra: Department of the Prime Minister and Cabinet. 2020. Available from: <https://www.health.gov.au/resources/publications/nudge-vs-superbugs-12-months-on>
  46. Last BS, Buitendijk AM, Timon CE, Mitra N, Beidas RS. Systematic review of clinician-directed nudges in healthcare contexts. *BMJ Open.* 2021;11(7):e048801.
  47. Schultz PW, Nolan JM, Cialdini RB, Goldstein NJ, Griskevicius V. The constructive, destructive, and reconstructive power of social norms. *Psychol Sci.* 2007;18(5):429-34.
  48. Sunstein C. Nudges that fail. *Behavioural Public Policy.* 2017;1(1):4-25.
  49. Braithwaite J, Glasziou P, Westbrook J. The three numbers you need to know about healthcare: the 60-30-10 Challenge. *BMC Med.* 2020;18(1):102.

## FIGURE LEGENDS

### Figure 1: PRISMA flow chart of search and screening results

\*One study had two publications.

### Figure 2: Harvest plot of effects of nudge interventions targeting antibiotic prescribing in primary care on overall antibiotic prescribing. Each mark or column represents one nudge

1  
2  
3 intervention. Column height represents the risk of bias in the study: tallest columns are  
4 studies with low risk of bias; medium columns are moderate risk of bias; short columns are  
5 high risk of bias.  
6  
7  
8  
9

10 **Figure 3: Harvest plot of effects of social norm feedback nudge interventions on overall**  
11 **antibiotic prescribing by intervention features.** Each mark or column represents one nudge  
12 intervention. Column height represents the risk of bias of the study: tallest columns are  
13 studies with low risk of bias; medium columns are moderate risk of bias; short columns are  
14 high risk of bias.  
15  
16  
17  
18  
19  
20  
21  
22  
23  
24  
25  
26  
27  
28  
29  
30  
31  
32  
33  
34  
35  
36  
37  
38  
39  
40  
41  
42  
43  
44  
45  
46  
47  
48  
49  
50  
51  
52  
53  
54  
55  
56  
57  
58  
59  
60

For peer review only

## TABLES

Table 2: Characteristics of studies evaluating nudge interventions to improve antibiotic prescribing in primary care

| Author, Year      | Country          | Sample size     | Infections targeted | Nudge intervention/s | Outcomes of interest                                                                                    | Overall risk of bias <sup>a</sup> |
|-------------------|------------------|-----------------|---------------------|----------------------|---------------------------------------------------------------------------------------------------------|-----------------------------------|
| Awad, 2006        | Sudan            | 20 practices    | All                 | Social norm feedback | No. of consultations with AB;<br>No. of consultations with an inappropriate AB <sup>b</sup>             | High                              |
| BETA, 2018 & 2020 | Australia        | 6608 physicians | All                 | Social norm feedback | No. of ABs per 1000 consultations                                                                       | Moderate                          |
| Bradley, 2019     | Northern Ireland | 331 practices   | All                 | Social norm feedback | No. of ABs per 1000 registered population                                                               | Moderate                          |
| Chang, 2020       | China            | 163 physicians  | All                 | Social norm feedback | No. of AB prescriptions per 100 prescriptions                                                           | Moderate                          |
| Curtis, 2021      | England          | 1401 practices  | All                 | Social norm feedback | % broad spectrum AB of all AB                                                                           | Low                               |
| Gerber, 2013      | USA              | 162 physicians  | RTI                 | Social norm feedback | % broad spectrum ABs among children with AB prescription;<br>ABs for viral RTI                          | High                              |
| Hallsworth, 2016  | England          | 1581 practices  | All                 | Social norm feedback | No. of ABs per 1000 registered population                                                               | Low                               |
| Hemkens, 2017     | Switzerland      | 2900 physicians | All                 | Social norm feedback | Antibiotic DDD per 1000 consultations                                                                   | Low                               |
| Hurlimann, 2016   | Switzerland      | 136 practices   | RTI; UTI            | Social norm feedback | % AB prescriptions for upper RTIs;<br>% penicillins for RTI;<br>% trimethoprim/sulfamethoxazole for UTI | Moderate                          |
| Kronman, 2020     | US               | 57 physicians   | RTI                 | Social norm feedback | % of RTI with AB prescribed                                                                             | Low                               |
| Lagerlov, 2000    | Norway           | 199 physicians  | UTI                 | Social norm feedback | % inappropriate ABs for UTI                                                                             | High                              |
| Mainous, 2000     | USA              | 216 physicians  | RTI                 | Social norm feedback | % inappropriate AB treatments                                                                           | Low                               |

|                   |           |                              |     |                                                                         |                                                                      |          |
|-------------------|-----------|------------------------------|-----|-------------------------------------------------------------------------|----------------------------------------------------------------------|----------|
| Meeker, 2014      | USA       | 14 physicians                | RTI | Public commitment                                                       | No. of ABs per 100 AB inappropriate RTIs                             | Moderate |
| Meeker, 2016      | USA       | 244 physicians               | RTI | Social norm feedback, accountable justification, suggested alternatives | No. of ABs per 100 AB inappropriate RTIs                             | Moderate |
| O'Connell, 1999   | Australia | 2440 physicians              | All | Social norm feedback                                                    | No. of ABs per 100 consultations                                     | Moderate |
| Persell, 2016     | USA       | 28 physicians                | RTI | Social norm feedback, accountable justification, suggested alternatives | No. of ABs per 100 RTIs;<br>No. of ABs per 100 AB inappropriate RTIs | High     |
| Ratajczak, 2019   | England   | 6995 practices               | All | Social norm feedback                                                    | No. of ABs per 1000 registered population                            | Moderate |
| Sondergaard, 2003 | Denmark   | 299 physicians               | RTI | Social norm feedback                                                    | No. of ABs per 1000 registered population                            | Moderate |
| Yang, 2014        | China     | 20 practices (54 physicians) | RTI | Public reporting                                                        | % of RTI consultations with AB;<br>% of RTI consultations with >1 AB | Low      |

RTI is respiratory tract infections; UTI is urinary tract infections. AB is antibiotic. No. is number. DDD is defined daily doses.

<sup>a</sup>Risk of bias assessed using the Cochrane Effective Practice and Organisation of Care group's tool for studies with a control group. Overall rating assigned 'low' when all criteria were 'low' risk; 'medium' when 1-2 criteria were scored 'unclear' or 'high' risk; and 'high' when >2 criteria were scored 'unclear' or 'high' risk.

<sup>b</sup>Inappropriate with respect to antibiotic, doses and/or duration.

Table 3: Characteristics and promise rating of social norm feedback nudge interventions to improve antibiotic prescribing in primary care

| Author, Year      | Based on individual physician or practice data? | Frequency of feedback  | Targeting high prescribers or all prescribers? | Prescribing compared to which peers?                     | Mode                | Graphic display of prescribing?            | Supporting information provided in intervention group                        | Effect on overall antibiotic prescribing |
|-------------------|-------------------------------------------------|------------------------|------------------------------------------------|----------------------------------------------------------|---------------------|--------------------------------------------|------------------------------------------------------------------------------|------------------------------------------|
| Awad, 2006        | Practice                                        | Twice, one month apart | All                                            | Average of region                                        | Letter              | No                                         | Recommendations for improvement; 2 personal visits                           | Reduction                                |
| BETA, 2018 & 2020 | Physician                                       | Once                   | Top 30% highest prescribers                    | Prescribing at a higher rate than e.g. 70% of physicians | Letter              | Group 1: No<br>Group 2: No<br>Group 3: Yes | Group 1: education material<br>Group 2: delayed prescribing<br>Group 3: none | Reduction                                |
| Bradley, 2019     | Practice                                        | Once                   | Top 20% highest prescribing practices          | Prescribing at higher rate than 80% of practices         | Letter              | No                                         | None                                                                         | Reduction                                |
| Chang, 2020       | Physician                                       | Every 10 days          | All                                            | Ranking within department                                | Electronic          | No                                         | Precautions for antibiotics being used                                       | Reduction                                |
| Curtis, 2021      | Practice                                        | Thrice, 5 weekly       | Top 20% highest broad-spectrum prescribing     | All other practices                                      | Letter, fax & email | Yes                                        | Group 1: none<br>Group 2: contact for more details, cost savings data        | No change                                |
| Gerber, 2013      | Physician                                       | Quarterly for 1 year   | All                                            | Mean of practice and region                              | Email               | Yes                                        | 1 hour presentation                                                          | Reduction                                |
| Hallsworth, 2016  | Practice                                        | Once                   | Top 20% highest prescribing practices          | Prescribing at higher rate than 80% of practices         | Letter              | No                                         | Patient focused education material                                           | Reduction                                |
| Hemkens, 2017     | Physician                                       | Quarterly for 2 years  | Top 50% highest prescribers                    | Mean of all physicians                                   | Letter              | Yes                                        | Link to guidelines                                                           | No change                                |

|                   |           |                            |                             |                                                                     |         |         |                                             |                       |
|-------------------|-----------|----------------------------|-----------------------------|---------------------------------------------------------------------|---------|---------|---------------------------------------------|-----------------------|
| Hurlimann, 2016   | Practice  | Twice yearly for 2 years   | All                         | Mean of intervention group                                          | Letter  | No      | Guidelines                                  | No change             |
| Kronman, 2020     | Physician | Four times, over 11 months | All                         | Mean of 20% lowest prescribers                                      | Unclear | Yes     | Online tutorials and videos                 | Reduction             |
| Lagerlov, 2000    | Physician | Twice, one week apart      | All <sup>a</sup>            | Mean of group                                                       | Meeting | Unclear | 2 x educational meetings                    | Reduction             |
| Mainous, 2000     | Physician | Once                       | All                         | Percentile rank compared to peers                                   | Letter  | Unclear | Group 1: none<br>Group 2: patient education | Reduction for group 2 |
| Meeker, 2016      | Physician | Monthly for 18 months      | All <sup>b</sup>            | Mean of top 10% lowest prescribers                                  | Email   | No      | Link to guidelines                          | Reduction             |
| O'Connell, 1999   | Physician | Twice, six months apart    | All                         | Interquartile range (25 <sup>th</sup> -75 <sup>th</sup> percentile) | Letter  | Yes     | Educational newsletter                      | No change             |
| Persell, 2016     | Physician | Monthly                    | All <sup>b</sup>            | Mean of top 10% lowest prescribers                                  | Email   | No      | Link to guidelines                          | Reduction             |
| Ratajczak, 2019   | Physician | Once                       | Top 20% highest prescribers | Prescribing at higher rate than 80%/90% of practices                | Letter  | No      | Patient focused education material          | Reduction             |
| Sondergaard, 2003 | Physician | Once                       | All                         | Mean of region                                                      | Letter  | Unclear | Guidelines                                  | Reduction             |

<sup>a</sup>Antibiotic prescribing rates for individual physicians were compared to that of 4-8 other physicians in their group based on geographical area.

<sup>b</sup>The prescribers with the lowest prescribing (bottom 10%) were notified they were 'Top performers'



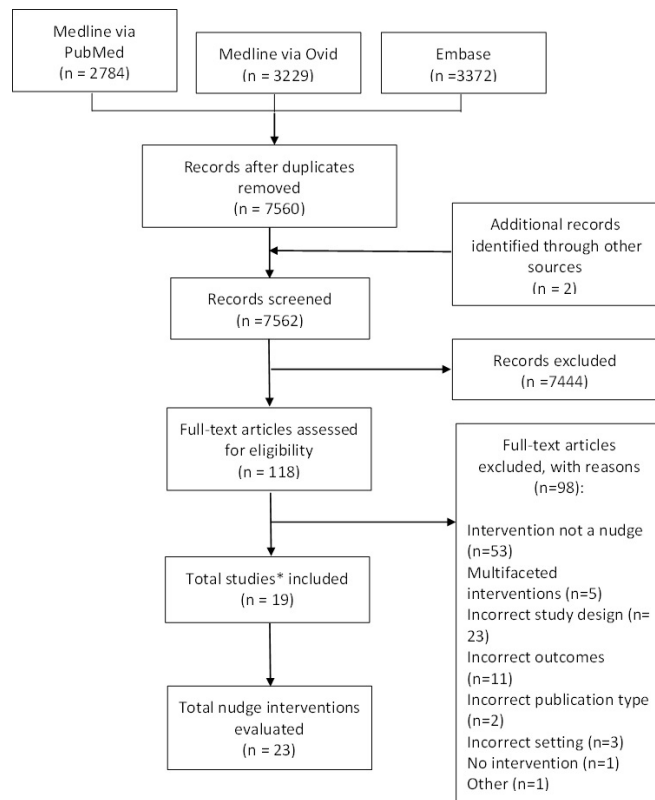

32 Figure 1: PRISMA flow chart of search and screening results

33 \*One study had two publications.

34 243x193mm (120 x 120 DPI)

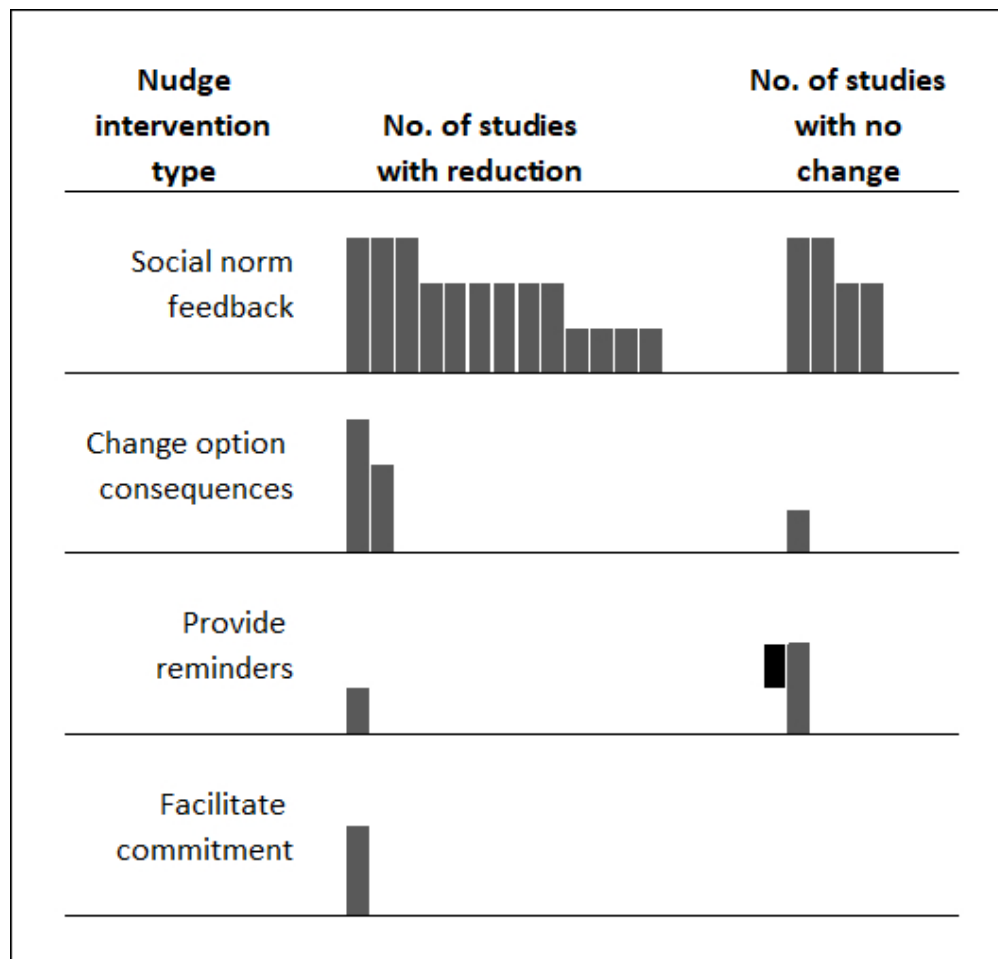

Figure 2: Harvest plot of effects of nudge interventions targeting antibiotic prescribing in primary care on overall antibiotic prescribing. Each mark or column represents one nudge intervention. Column height represents the risk of bias in the study: tallest columns are studies with low risk of bias; medium columns are moderate risk of bias; short columns are high risk of bias.

285x272mm (47 x 47 DPI)

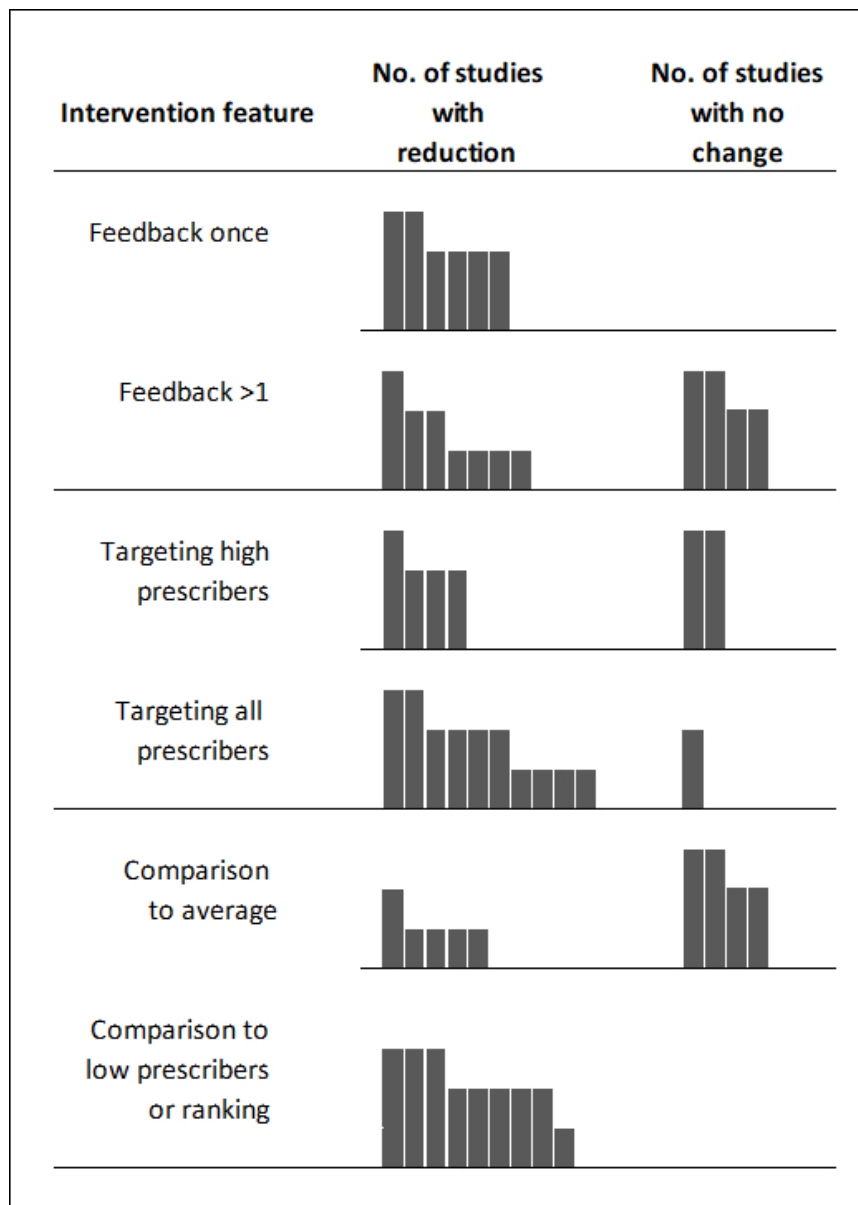

Figure 3: Harvest plot of effects of social norm feedback nudge interventions on overall antibiotic prescribing by intervention features. Each mark or column represents one nudge intervention. Column height represents the risk of bias of the study: tallest columns are studies with low risk of bias; medium columns are moderate risk of bias; short columns are high risk of bias.

281x390mm (47 x 47 DPI)

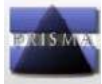

# PRISMA 2009 Checklist

| Section/topic                      | #  | Checklist item                                                                                                                                                                                                                                                                                              | Reported on page # |
|------------------------------------|----|-------------------------------------------------------------------------------------------------------------------------------------------------------------------------------------------------------------------------------------------------------------------------------------------------------------|--------------------|
| <b>TITLE</b>                       |    |                                                                                                                                                                                                                                                                                                             |                    |
| Title                              | 1  | Identify the report as a systematic review, meta-analysis, or both.                                                                                                                                                                                                                                         | 1                  |
| <b>ABSTRACT</b>                    |    |                                                                                                                                                                                                                                                                                                             |                    |
| Structured summary                 | 2  | Provide a structured summary including, as applicable: background; objectives; data sources; study eligibility criteria, participants, and interventions; study appraisal and synthesis methods; results; limitations; conclusions and implications of key findings; systematic review registration number. | 2                  |
| <b>INTRODUCTION</b>                |    |                                                                                                                                                                                                                                                                                                             |                    |
| Rationale                          | 3  | Describe the rationale for the review in the context of what is already known.                                                                                                                                                                                                                              | 4-5                |
| Objectives                         | 4  | Provide an explicit statement of questions being addressed with reference to participants, interventions, comparisons, outcomes, and study design (PICOS).                                                                                                                                                  | 5-6                |
| <b>METHODS</b>                     |    |                                                                                                                                                                                                                                                                                                             |                    |
| Protocol and registration          | 5  | Indicate if a review protocol exists, if and where it can be accessed (e.g., Web address), and, if available, provide registration information including registration number.                                                                                                                               | n/a                |
| Eligibility criteria               | 6  | Specify study characteristics (e.g., PICOS, length of follow-up) and report characteristics (e.g., years considered, language, publication status) used as criteria for eligibility, giving rationale.                                                                                                      | 7-8                |
| Information sources                | 7  | Describe all information sources (e.g., databases with dates of coverage, contact with study authors to identify additional studies) in the search and date last searched.                                                                                                                                  | 7                  |
| Search                             | 8  | Present full electronic search strategy for at least one database, including any limits used, such that it could be repeated.                                                                                                                                                                               | 7                  |
| Study selection                    | 9  | State the process for selecting studies (i.e., screening, eligibility, included in systematic review, and, if applicable, included in the meta-analysis).                                                                                                                                                   | 8                  |
| Data collection process            | 10 | Describe method of data extraction from reports (e.g., piloted forms, independently, in duplicate) and any processes for obtaining and confirming data from investigators.                                                                                                                                  | 8-9                |
| Data items                         | 11 | List and define all variables for which data were sought (e.g., PICOS, funding sources) and any assumptions and simplifications made.                                                                                                                                                                       | 8-9                |
| Risk of bias in individual studies | 12 | Describe methods used for assessing risk of bias of individual studies (including specification of whether this was done at the study or outcome level), and how this information is to be used in any data synthesis.                                                                                      | 10                 |
| Summary measures                   | 13 | State the principal summary measures (e.g., risk ratio, difference in means).                                                                                                                                                                                                                               | 8-9                |
| Synthesis of results               | 14 | Describe the methods of handling data and combining results of studies, if done, including measures of consistency (e.g., $I^2$ ) for each meta-analysis.                                                                                                                                                   | 10-11              |

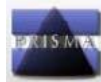

# PRISMA 2009 Checklist

| Section/topic                 | #  | Checklist item                                                                                                                                                                                           | Reported on page # |
|-------------------------------|----|----------------------------------------------------------------------------------------------------------------------------------------------------------------------------------------------------------|--------------------|
| Risk of bias across studies   | 15 | Specify any assessment of risk of bias that may affect the cumulative evidence (e.g., publication bias, selective reporting within studies).                                                             | n/a                |
| Additional analyses           | 16 | Describe methods of additional analyses (e.g., sensitivity or subgroup analyses, meta-regression), if done, indicating which were pre-specified.                                                         | 10-11              |
| <b>RESULTS</b>                |    |                                                                                                                                                                                                          |                    |
| Study selection               | 17 | Give numbers of studies screened, assessed for eligibility, and included in the review, with reasons for exclusions at each stage, ideally with a flow diagram.                                          | 12                 |
| Study characteristics         | 18 | For each study, present characteristics for which data were extracted (e.g., study size, PICOS, follow-up period) and provide the citations.                                                             | 12                 |
| Risk of bias within studies   | 19 | Present data on risk of bias of each study and, if available, any outcome level assessment (see item 12).                                                                                                | 12 & Supp file 3   |
| Results of individual studies | 20 | For all outcomes considered (benefits or harms), present, for each study: (a) simple summary data for each intervention group (b) effect estimates and confidence intervals, ideally with a forest plot. | Tables 3 & 4       |
| Synthesis of results          | 21 | Present results of each meta-analysis done, including confidence intervals and measures of consistency.                                                                                                  | 14-16              |
| Risk of bias across studies   | 22 | Present results of any assessment of risk of bias across studies (see Item 15).                                                                                                                          | 12 & Supp file 3   |
| Additional analysis           | 23 | Give results of additional analyses, if done (e.g., sensitivity or subgroup analyses, meta-regression [see Item 16]).                                                                                    | 17-18              |
| <b>DISCUSSION</b>             |    |                                                                                                                                                                                                          |                    |
| Summary of evidence           | 24 | Summarize the main findings including the strength of evidence for each main outcome; consider their relevance to key groups (e.g., healthcare providers, users, and policy makers).                     | 19                 |
| Limitations                   | 25 | Discuss limitations at study and outcome level (e.g., risk of bias), and at review-level (e.g., incomplete retrieval of identified research, reporting bias).                                            | 22                 |
| Conclusions                   | 26 | Provide a general interpretation of the results in the context of other evidence, and implications for future research.                                                                                  | 22-23              |
| <b>FUNDING</b>                |    |                                                                                                                                                                                                          |                    |
| Funding                       | 27 | Describe sources of funding for the systematic review and other support (e.g., supply of data); role of funders for the systematic review.                                                               | 24                 |

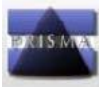

# PRISMA 2009 Checklist

For more information, visit: [www.prisma-statement.org](http://www.prisma-statement.org).

Page 2 of 2

For peer review only

1  
2  
3  
4  
5  
6  
7  
8  
9  
10  
11  
12  
13  
14  
15  
16  
17  
18  
19  
20  
21  
22  
23  
24  
25  
26  
27  
28  
29  
30  
31  
32  
33  
34  
35  
36  
37  
38  
39  
40  
41  
42  
43  
44  
45  
46  
47

Raban et al. Nudge interventions to reduce unnecessary antibiotic prescribing in primary care: a systematic review

## SEARCH STRATEGY

### MEDLINE (via Ovid and PubMed)

Date searched: 23 April 2021

| Search ID# | Search Terms                                                                                                                                                                                                                       |
|------------|------------------------------------------------------------------------------------------------------------------------------------------------------------------------------------------------------------------------------------|
| 1          | exp Ambulatory Care/                                                                                                                                                                                                               |
| 2          | exp Community Medicine/                                                                                                                                                                                                            |
| 3          | exp General Practice/                                                                                                                                                                                                              |
| 4          | exp General Practitioners/                                                                                                                                                                                                         |
| 5          | exp Primary Health Care/                                                                                                                                                                                                           |
| 6          | exp Physicians, Family/                                                                                                                                                                                                            |
| 7          | exp Physicians, Primary Care/                                                                                                                                                                                                      |
| 8          | "general practice".ti,ab.                                                                                                                                                                                                          |
| 9          | "general practitioner*".ti,ab.                                                                                                                                                                                                     |
| 10         | "family physician*".ti,ab.                                                                                                                                                                                                         |
| 11         | "family practice".ti,ab.                                                                                                                                                                                                           |
| 12         | "primary care".ti,ab.                                                                                                                                                                                                              |
| 13         | "primary health care".ti,ab.                                                                                                                                                                                                       |
| 14         | "primary healthcare".ti,ab.                                                                                                                                                                                                        |
| 15         | exp *anti-bacterial agents/tu or exp *anti-infective agents, urinary/tu                                                                                                                                                            |
| 16         | antibiot*.ti,ab.                                                                                                                                                                                                                   |
| 17         | anti-biot*.ti,ab.                                                                                                                                                                                                                  |
| 18         | anti-microb*.ti,ab.                                                                                                                                                                                                                |
| 19         | antimicrob*.ti,ab.                                                                                                                                                                                                                 |
| 20         | anti-infective*.ti,ab.                                                                                                                                                                                                             |
| 21         | antiinfective*.ti,ab.                                                                                                                                                                                                              |
| 22         | anti-bacterial*.ti,ab.                                                                                                                                                                                                             |
| 23         | antibacterial*.ti,ab.                                                                                                                                                                                                              |
| 24         | randomized controlled trial.pt                                                                                                                                                                                                     |
| 25         | controlled clinical trial.pt                                                                                                                                                                                                       |
| 26         | pragmatic clinical trial.pt                                                                                                                                                                                                        |
| 27         | multicenter study.pt                                                                                                                                                                                                               |
| 28         | exp non-randomized controlled trials as topic/                                                                                                                                                                                     |
| 29         | exp controlled before-after studies/                                                                                                                                                                                               |
| 30         | (randomis* or randomiz* or randomly).ti,ab.                                                                                                                                                                                        |
| 31         | groups.ab.                                                                                                                                                                                                                         |
| 32         | (trial or multicenter or multi center or multicentre or multi centre).ti.                                                                                                                                                          |
| 33         | (intervention? or effect? or impact? or controlled or control group? or (before adj5 after) or (pre adj5 post) or ((pretest or pre test) and (posttest or post test)) or quasiexperiment* or quasi experiment* or evaluat*).ti,ab. |
| 35         | or/1-14                                                                                                                                                                                                                            |
| 36         | or/15-23                                                                                                                                                                                                                           |
| 37         | or/24-34                                                                                                                                                                                                                           |

Raban et al. Nudge interventions to reduce unnecessary antibiotic prescribing in primary care: a systematic review

|    |                                |
|----|--------------------------------|
| 38 | 35 and 36 and 37               |
| 39 | limit 38 to yr="1997 -Current" |
| 40 | limit 39 to english language   |
| 41 | limit 40 to journal article    |
| 42 | limit 41 to humans             |

### Embase (via Ovid)

Date searched: 23 April 2021

| Search ID# | Search Terms                                                                                                                                                                                                                       |
|------------|------------------------------------------------------------------------------------------------------------------------------------------------------------------------------------------------------------------------------------|
| 1          | exp Ambulatory Care/                                                                                                                                                                                                               |
| 2          | exp Community Medicine/                                                                                                                                                                                                            |
| 3          | exp General Practice/                                                                                                                                                                                                              |
| 4          | exp General Practitioners/                                                                                                                                                                                                         |
| 5          | exp Primary Health Care/                                                                                                                                                                                                           |
| 6          | exp Family Medicine/                                                                                                                                                                                                               |
| 7          | exp Primary Medical Care/                                                                                                                                                                                                          |
| 8          | "general practice".ti,ab.                                                                                                                                                                                                          |
| 9          | "general practitioner*".ti,ab.                                                                                                                                                                                                     |
| 10         | "family physician*".ti,ab.                                                                                                                                                                                                         |
| 11         | "family practice".ti,ab.                                                                                                                                                                                                           |
| 12         | "primary care".ti,ab.                                                                                                                                                                                                              |
| 13         | "primary health care".ti,ab.                                                                                                                                                                                                       |
| 14         | "primary healthcare".ti,ab.                                                                                                                                                                                                        |
| 15         | exp *anti-infective agents/                                                                                                                                                                                                        |
| 16         | exp *anti-infective therapy/ or exp *antimicrobial therapy/                                                                                                                                                                        |
| 17         | exp *antibiotic agent/                                                                                                                                                                                                             |
| 18         | antibiot*.ti,ab.                                                                                                                                                                                                                   |
| 19         | anti-biot*.ti,ab.                                                                                                                                                                                                                  |
| 20         | anti-microb*.ti,ab.                                                                                                                                                                                                                |
| 21         | antimicrob*.ti,ab.                                                                                                                                                                                                                 |
| 22         | anti-infective*.ti,ab.                                                                                                                                                                                                             |
| 23         | antiinfective*.ti,ab.                                                                                                                                                                                                              |
| 24         | anti-bacterial*.ti,ab.                                                                                                                                                                                                             |
| 25         | antibacterial*.ti,ab.                                                                                                                                                                                                              |
| 26         | exp "controlled clinical trial (topic)"/                                                                                                                                                                                           |
| 27         | exp epidemiology/                                                                                                                                                                                                                  |
| 28         | (randomis* or randomiz* or randomly).ti,ab.                                                                                                                                                                                        |
| 29         | groups.ab.                                                                                                                                                                                                                         |
| 30         | (trial or multicenter or multi center or multicentre or multi centre).ti.                                                                                                                                                          |
| 31         | (intervention? or effect? or impact? or controlled or control group? or (before adj5 after) or (pre adj5 post) or ((pretest or pre test) and (posttest or post test)) or quasiexperiment* or quasi experiment* or evaluat*).ti,ab. |
| 32         | or/1-14                                                                                                                                                                                                                            |



Raban et al. Nudge interventions to reduce unnecessary antibiotic prescribing in primary care: a systematic review

|    |                                                                                                                |
|----|----------------------------------------------------------------------------------------------------------------|
| 33 | or/15-25                                                                                                       |
| 34 | or/26-31                                                                                                       |
| 35 | 32 and 33 and 34                                                                                               |
| 36 | limit 35 to english language                                                                                   |
| 37 | limit 36 to human                                                                                              |
| 38 | limit 37 to yr="1997 -Current"                                                                                 |
| 39 | limit 38 to (conference abstract or "conference review" or editorial or erratum or letter or note or "review") |
| 40 | 38 not 39                                                                                                      |
| 41 | remove duplicates from 40                                                                                      |
| 42 | limit 41 to embase                                                                                             |

### Websites searched

Date searched: 23 April 2021

| Organisation name                                       | URL                                                                                                               |
|---------------------------------------------------------|-------------------------------------------------------------------------------------------------------------------|
| Behavioural Economics Team of the Australian Government | <a href="https://behaviouraleconomics.pmc.gov.au/">https://behaviouraleconomics.pmc.gov.au/</a>                   |
| Behavioural Insights Team                               | <a href="https://www.bi.team">https://www.bi.team</a>                                                             |
| Danish Nudging Network                                  | <a href="https://www.danishnudgingnetwork.dk/">https://www.danishnudgingnetwork.dk/</a>                           |
| iNudgeyou                                               | <a href="https://inudgeyou.com/en/">https://inudgeyou.com/en/</a>                                                 |
| Nudge France                                            | <a href="http://www.nudgefrance.org/">http://www.nudgefrance.org/</a>                                             |
| Nudge-it                                                | <a href="https://www.nudge-it.eu/">https://www.nudge-it.eu/</a>                                                   |
| Nudge Italia                                            | <a href="http://www.nudgeitalia.it/">http://www.nudgeitalia.it/</a>                                               |
| Norwegian Nudging Network                               | <a href="https://sites.google.com/view/norsk nudgenet/home">https://sites.google.com/view/norsk nudgenet/home</a> |
| Penn Medicine Nudge Unit                                | <a href="https://nudgeunit.upenn.edu">https://nudgeunit.upenn.edu</a>                                             |
| The European Nudging Network                            | <a href="http://tenudge.eu/">http://tenudge.eu/</a>                                                               |
| The Swedish Nudging Network                             | <a href="https://theswedishnudgingnetwork.com/">https://theswedishnudgingnetwork.com/</a>                         |

Raban et al. Nudge interventions to reduce unnecessary antibiotic prescribing in primary care: a systematic review

### SUPPLEMENTARY FILE 3

Table S3: Assessment of risk of bias\* against each criterion for individual studies

| Study                                    | Random sequence generation | Allocation concealment | Baseline outcome measurements similar | Baseline characteristics similar | Incomplete outcome data | Blinding of outcome measurement assessment | Protections against contamination | Selective reporting | Other bias | TOTAL number of criteria with low risk of bias |
|------------------------------------------|----------------------------|------------------------|---------------------------------------|----------------------------------|-------------------------|--------------------------------------------|-----------------------------------|---------------------|------------|------------------------------------------------|
| Awad, 2006                               | ✓                          | ?                      | ✓                                     | ?                                | ?                       | ?                                          | ✓                                 | X                   | ✓          | 4/9                                            |
| BETA, 2018 & 2020                        | ✓                          | ✓                      | ✓                                     | ✓                                | ?                       | ✓                                          | ✓                                 | ✓                   | ✓          | 8/9                                            |
| Bradley, 2019                            | X                          | X                      | ✓                                     | ✓                                | ✓                       | ✓                                          | ✓                                 | ✓                   | ✓          | 7/9                                            |
| Chang, 2020                              | ✓                          | X                      | ✓                                     | ✓                                | ✓                       | ✓                                          | ✓                                 | ✓                   | ✓          | 8/9                                            |
| Curtis, 2021                             | ✓                          | ✓                      | ✓                                     | ✓                                | ✓                       | ✓                                          | ✓                                 | ✓                   | ✓          | 9/9                                            |
| Gerber, 2013                             | ✓                          | ✓                      | ✓                                     | ✓                                | ?                       | X                                          | ?                                 | ✓                   | ✓          | 6/9                                            |
| Hallsworth, 2016                         | ✓                          | ✓                      | ✓                                     | ✓                                | ✓                       | ✓                                          | ✓                                 | ✓                   | ✓          | 9/9                                            |
| Hemkens, 2017                            | ✓                          | ✓                      | ✓                                     | ✓                                | ✓                       | ✓                                          | ✓                                 | ✓                   | ✓          | 9/9                                            |
| Hurlimann, 2016                          | ✓                          | ✓                      | ✓                                     | ✓                                | ✓                       | X                                          | ✓                                 | ✓                   | ✓          | 8/9                                            |
| Kronman, 2020                            | ✓                          | ✓                      | ✓                                     | ✓                                | ✓                       | ✓                                          | ✓                                 | ✓                   | ✓          | 9/9                                            |
| Lagerlov, 2000                           | ✓                          | ✓                      | ✓                                     | ✓                                | X                       | ?                                          | ✓                                 | ?                   | X          | 6/9                                            |
| Mainous, 2000                            | ✓                          | ✓                      | ✓                                     | ✓                                | ✓                       | ✓                                          | ✓                                 | ✓                   | ✓          | 9/9                                            |
| Meeker, 2014                             | ✓                          | ✓                      | ✓                                     | ✓                                | ✓                       | ✓                                          | ?                                 | ✓                   | ✓          | 8/9                                            |
| Meeker, 2016                             | ✓                          | ✓                      | ?                                     | ?                                | ✓                       | ✓                                          | ✓                                 | ✓                   | X          | 6/9                                            |
| O'Connell, 1999                          | ?                          | ✓                      | ✓                                     | ✓                                | ✓                       | ✓                                          | ✓                                 | ✓                   | ✓          | 8/9                                            |
| Persell, 2016                            | ✓                          | ✓                      | ✓                                     | ?                                | ✓                       | ✓                                          | ?                                 | ✓                   | X          | 7/9                                            |
| Ratajczak, 2019                          | X                          | X                      | ✓                                     | ✓                                | ✓                       | ✓                                          | ✓                                 | ✓                   | ✓          | 7/9                                            |
| Sondergaard, 2003                        | ?                          | ✓                      | ✓                                     | ✓                                | ✓                       | ✓                                          | ✓                                 | ✓                   | ✓          | 8/9                                            |
| Yang, 2014                               | ✓                          | ✓                      | ✓                                     | ✓                                | ✓                       | ✓                                          | ✓                                 | ✓                   | ✓          | 9/9                                            |
| Number of studies with high risk of bias | 2                          | 3                      | 0                                     | 0                                | 1                       | 2                                          | 0                                 | 1                   | 3          |                                                |
| Number of studies with unclear bias      | 2                          | 1                      | 1                                     | 3                                | 3                       | 2                                          | 3                                 | 1                   | 0          |                                                |
| Number of studies with                   | 15                         | 15                     | 15                                    | 16                               | 15                      | 15                                         | 16                                | 17                  | 16         |                                                |

Raban et al. Nudge interventions to reduce unnecessary antibiotic prescribing in primary care: a systematic review

|                  |  |  |  |  |  |  |  |  |  |  |
|------------------|--|--|--|--|--|--|--|--|--|--|
| low risk of bias |  |  |  |  |  |  |  |  |  |  |
|------------------|--|--|--|--|--|--|--|--|--|--|

'X' denotes high risk of bias for this criterion; '?' denotes unclear risk of bias; '✓' denotes low risk of bias.

\*Risk of bias assessed using the Cochrane Effective Practice and Organisation of Care group's tool ([https://epoc.cochrane.org/sites/epoc.cochrane.org/files/public/uploads/Resources-for-authors2017/suggested\\_risk\\_of\\_bias\\_criteria\\_for\\_epoc\\_reviews.pdf](https://epoc.cochrane.org/sites/epoc.cochrane.org/files/public/uploads/Resources-for-authors2017/suggested_risk_of_bias_criteria_for_epoc_reviews.pdf))

For peer review only

1  
2  
3  
4  
5  
6  
7  
8  
9  
10  
11  
12  
13  
14  
15  
16  
17  
18  
19  
20  
21  
22  
23  
24  
25  
26  
27  
28  
29  
30  
31  
32  
33  
34  
35  
36  
37  
38  
39  
40  
41  
42  
43  
44  
45  
46  
47  
48  
49  
50  
51  
52  
53  
54  
55  
56  
57  
58  
59  
60

Raban et al. Nudge interventions to reduce unnecessary antibiotic prescribing in primary care: a systematic review

#### SUPPLEMENTARY FILE 4

Table S4: Effects of nudge interventions to improve antibiotic use in primary care

| Study                                                        | Design                   | Interventions                                | Control    | Outcome/s                                                  | Follow-up period   | Reported statistics                                                                       | 95% CI, p-value                                                          | Vote counting assessment |
|--------------------------------------------------------------|--------------------------|----------------------------------------------|------------|------------------------------------------------------------|--------------------|-------------------------------------------------------------------------------------------|--------------------------------------------------------------------------|--------------------------|
| <b>Decision information – provide social reference point</b> |                          |                                              |            |                                                            |                    |                                                                                           |                                                                          |                          |
| Awad, 2006                                                   | Cluster randomised trial | Social norm feedback                         | Usual care | No. of consultations with AB prescribed                    | 3-months post      | Mean difference: -2.8                                                                     | (-1.1, -4.6), p=0.004                                                    | Reduction                |
|                                                              |                          |                                              |            | No. of consultations with an inappropriate AB <sup>a</sup> | 3-months post      | Mean difference: -1.9                                                                     | (-0.1, -3.7), p=0.040                                                    | n/a                      |
| BETA, 2018 & 2020                                            | Cluster randomised trial | Social norm feedback with graph              | Usual care | No. of ABs per 1000 consultations                          | 6 & 12months post  | Mean difference (6-months): -13.6 (~12% reduction)<br>(12-months): -9.3 (~9.4% reduction) | 6-months: (-16.6, -10.6), p<0.00001<br>12-months: (-12.3, -6.2); p<0.001 | Reduction                |
|                                                              |                          | Social norm feedback with education material | Usual care | No. of ABs per 1000 consultations                          | 6 & 12-months post | Mean difference (6-months): -10.3 (~9.3% reduction)<br>(12-months):                       | 6-months: (-13.8, -6.8), p<0.001<br>12-months: (-11, -5.6); p<0.001      | n/a                      |

Raban et al. Nudge interventions to reduce unnecessary antibiotic prescribing in primary care: a systematic review

|               |                                               |                                               |            |                                                 |                                               |                                                                                                 |                                                                           |           |
|---------------|-----------------------------------------------|-----------------------------------------------|------------|-------------------------------------------------|-----------------------------------------------|-------------------------------------------------------------------------------------------------|---------------------------------------------------------------------------|-----------|
|               |                                               |                                               |            |                                                 |                                               | -8.3 (~8.4% reduction)                                                                          |                                                                           |           |
|               |                                               | Social norm feedback with delayed prescribing | Usual      | No. ABs per 1000 consultation                   | 6 & 12-months post                            | Mean difference (6-months): -11.8 (~10.7% reduction)<br><br>(12-months): -8.8 (~8.9% reduction) | 6 months: (-14.7, -8.9); p<0.001<br><br>12-months: (-11.6, -6.0); p<0.001 | n/a       |
| Bradley, 2019 | Regression discontinuity study                | Social norm feedback                          | Usual care | No. of ABs per 1000 registered population       | 3-months post                                 | Mean difference: -25.7                                                                          | (-42.5, -8.8), p=0.0028                                                   | Reduction |
|               |                                               |                                               |            |                                                 | 12-months post                                | Mean difference: -58.7 (~5% reduction)                                                          | (-116.7, -0.7), p=0.047                                                   | n/a       |
| Chang, 2020   | Cluster randomised crossover-controlled trial | Social norm feedback                          | Usual care | No. of AB prescriptions per total prescriptions | 3-month intervention period                   | Relative reduction in intervention arm: 35.2%; in control arm: 30.8%                            | p<0.001                                                                   | Reduction |
|               |                                               |                                               |            |                                                 | 3-month intervention period (after crossover) | Relative reduction in intervention arm: 14.2%; in control arm: 4.6%                             | p<0.001                                                                   | n/a       |

## Raban et al. Nudge interventions to reduce unnecessary antibiotic prescribing in primary care: a systematic review

|                  |                          |                                  |            |                                                                   |                                   |                                           |                          |           |
|------------------|--------------------------|----------------------------------|------------|-------------------------------------------------------------------|-----------------------------------|-------------------------------------------|--------------------------|-----------|
| Curtis, 2021     | Randomised trial         | Social norm feedback (standard)  | Usual care | AB prescriptions per 1000 population                              | 6-months post                     | No change                                 | NS                       | No change |
|                  |                          |                                  |            | Proportion of antibiotics which were broad spectrum               | 6-months post                     | 2.1% reduction compared to controls       | p=0.104                  | n/a       |
|                  |                          | Social norm feedback (optimised) | Usual care | AB prescriptions per 1000 population                              | 6-months post                     | No change                                 | NS                       | No change |
|                  |                          |                                  |            | Proportion of antibiotics which were broad spectrum               | 6-months post                     | 2.1% reduction compared to controls       | P=0.046                  | n/a       |
| Gerber, 2013     | Cluster randomised trial | Social norm feedback             | Usual care | ABs for viral RTI                                                 | 12-month intervention period      | DID: -1.7%                                | NR, p=0.93               | Reduction |
|                  |                          |                                  |            | Percent of broad spectrum ABs among children with AB prescription | 12-month intervention period      | DID: -6.7%                                | NR, p=0.01               | n/a       |
| Hallsworth, 2016 | Randomised trial         | Social norm feedback             | Usual care | No. of ABs per 1000 registered population                         | 6-months post                     | IRR: 0.967 <sup>b</sup> (~3.3% reduction) | (0.957, 0.977), p<0.0001 | Reduction |
| Hemkens, 2017    | Randomised trial         | Social norm feedback             | Usual care | DDD per 1000 consultations                                        | First 1-year intervention period  | Between group difference: 0.81%           | (-2.56, 4.30), NR        | No change |
|                  |                          |                                  |            |                                                                   | Second 1-year intervention period | Between group difference: -1.73%          | (-5.07, 1.72%), p=0.32   |           |

## Raban et al. Nudge interventions to reduce unnecessary antibiotic prescribing in primary care: a systematic review

|                 |                                        |                                                      |                                        |                                                     |                              |                                                         |                       |           |
|-----------------|----------------------------------------|------------------------------------------------------|----------------------------------------|-----------------------------------------------------|------------------------------|---------------------------------------------------------|-----------------------|-----------|
| Hurlimann, 2016 | Cluster randomised trial               | Social norm feedback                                 | Usual care                             | Percentage of AB prescriptions for upper RTIs       | 24-month intervention period | Difference in proportion: -1.2                          | (-10.5, -8.2), p=0.66 | No change |
|                 |                                        |                                                      |                                        | Percentage of penicillins for RTI                   | 24-month intervention period | OR: 1.42                                                | (1.08-1.89), p=0.01   | n/a       |
|                 |                                        |                                                      |                                        | Percentage of trimethoprim/sulfamethoxazole for UTI | 24-month intervention period | OR: 2.16                                                | (1.19-3.91), p=0.01   | n/a       |
| Kronman, 2020   | Stepped wedge cluster randomised trial | Social norm feedback                                 | Usual care                             | Percentage of RTI with antibiotic prescription      | 12-months                    | OR: 0.93                                                | (0.90, 0.96), NR      | Reduction |
| Lagerlov, 2000  | Randomised trial                       | Social norm feedback                                 | Intervention for asthma care           | Percentage of inappropriate ABs for UTI             | 12-months post               | Relative decrease: -9.6%                                | NR, p=0.0004          | Reduction |
| Mainous, 2000   | Randomised trial                       | Social norm feedback                                 | Usual care                             | Mean proportion of inappropriate AB treatments      | 5-months post                | NR                                                      | Not significant       | -         |
|                 |                                        | Social norm feedback with patient education material | Usual care                             | Mean proportion of inappropriate AB treatments      | 5-months post                | Dunnett's T: 2.374                                      | NR, p<0.05            | Reduction |
| Meeker, 2016    | Cluster randomised trial               | Social norm feedback                                 | Usual care                             | No. of ABs per 100 AB inappropriate RTIs            | 18-month intervention period | DID: -5.2%                                              | (-6.9, -1.6), p<0.01  | Reduction |
| O'Connell, 1999 | Randomised trial                       | Social norm feedback                                 | Interventions for other medication use | No. of AB prescriptions per 100 consultations       | 4-months post                | Median: no difference between intervention and controls | NR                    | No change |

## Raban et al. Nudge interventions to reduce unnecessary antibiotic prescribing in primary care: a systematic review

|                                                        |                                |                           |            |                                                          |                              |                                              |                             |           |
|--------------------------------------------------------|--------------------------------|---------------------------|------------|----------------------------------------------------------|------------------------------|----------------------------------------------|-----------------------------|-----------|
| Persell, 2016                                          | Randomised trial               | Social norm feedback      | Usual care | No. of ABs per 100 RTIs                                  | 12-month intervention period | OR: 0.73                                     | (0.53, 0.995), $p < 0.05$   | Reduction |
|                                                        |                                |                           |            | No. of ABs per 100 AB inappropriate RTIs                 | 12-month intervention period | OR: 0.45                                     | (0.18, 1.11), NR            | n/a       |
| Ratajczak, 2019                                        | Regression discontinuity study | Social norm feedback      | Usual care | No. of ABs per 1000 registered population                | 6-months post                | Percent change in intervention group: -3.69% | (-5.10, -2.29), $p < 0.001$ | Reduction |
| Sondergaard, 2003                                      | Randomised trial               | Social norm feedback      | Guidelines | No. of ABs per 1000 registered patients                  | 3-months post                | Mean difference: -0.6                        | (-2.8, 1.6), NR             | Reduction |
|                                                        |                                |                           |            | Percent of prescriptions for narrow-spectrum penicillins | 3-months post                | Mean difference: 0.7                         | (-0.41, 1.7), NR            | n/a       |
| <b>Decision structure – change option consequences</b> |                                |                           |            |                                                          |                              |                                              |                             |           |
| Meeker, 2016                                           | Cluster randomised trial       | Accountable justification | Usual care | No. of ABs per 100 AB inappropriate RTIs                 | 18-month intervention period | DID: -7.0%                                   | (-9.1, -2.9), $p < 0.001$   | Reduction |
| Persell, 2016                                          | Randomised trial               | Accountable justification | Usual care | No. of ABs per 100 RTIs                                  | 12-month intervention period | OR: 1.05                                     | (0.80, 1.39), NR            | No change |
|                                                        |                                |                           |            | No. of ABs per 100 AB inappropriate RTIs                 | 12-month intervention period | OR: 0.98                                     | (0.42, 2.29), NR            | n/a       |
| Yang, 2014                                             | Cluster randomised trial       | Public reporting          | Education  | Percentage of RTI consultations with AB                  | 5-8 months post              | DID: -1.93                                   | (-6.61, 2.75), $p = 0.419$  | Reduction |
|                                                        |                                |                           |            | Percentage of RTI consultations with >1 AB               | 5-8 months post              | DID: -6.97                                   | (-13.94, 0.00), $p = 0.049$ | n/a       |



Raban et al. Nudge interventions to reduce unnecessary antibiotic prescribing in primary care: a systematic review

| <b>Decision assistance – provide reminders</b>     |                          |                        |            |                                          |                              |             |                        |           |
|----------------------------------------------------|--------------------------|------------------------|------------|------------------------------------------|------------------------------|-------------|------------------------|-----------|
| Meeker, 2016                                       | Cluster randomised trial | Suggested alternatives | Usual care | No. of ABs per 100 AB inappropriate RTIs | 18-month intervention period | DID: -5.0%  | (-7.8, 0.1%), p=0.66   | Reduction |
| Persell, 2016                                      | Randomised trial         | Suggested alternatives | Usual care | No. of ABs per 100 RTIs                  | 12-month intervention period | OR: 0.72    | (0.54, 0.96), p<0.01   | Reduction |
|                                                    |                          |                        |            | No. of ABs per 100 AB inappropriate RTIs | 12-month intervention period | OR: 0.68    | (0.29, 1.58), NR       | n/a       |
| <b>Decision assistance – facilitate commitment</b> |                          |                        |            |                                          |                              |             |                        |           |
| Meeker, 2014                                       | Randomised trial         | Public commitment      |            | No. of ABs per 100 AB inappropriate RTIs | 12-week intervention period  | DID: -19.7% | (-5.8, -33.04), p=0.02 | Reduction |

No. is 'number'. AB is 'antibiotic'. CI is 'confidence interval'. IRR is 'incidence rate ratio'. DDD is 'defined daily doses'. OR is odds ratio. RTI is 'respiratory tract infection'. UTI is 'urinary tract infection'. DID is 'difference in differences analysis'. NR is not reported. NS is 'not significant'.

\*The intervention promise was assessed based on all antibiotic outcomes reported in each study.

<sup>a</sup>Inappropriate with respect to antibiotic, doses and/or duration.

# BMJ Open

## Nudge interventions to reduce unnecessary antibiotic prescribing in primary care: a systematic review

|                                 |                                                                                                                                                                                                                                                                                                |
|---------------------------------|------------------------------------------------------------------------------------------------------------------------------------------------------------------------------------------------------------------------------------------------------------------------------------------------|
| Journal:                        | <i>BMJ Open</i>                                                                                                                                                                                                                                                                                |
| Manuscript ID                   | bmjopen-2022-062688.R1                                                                                                                                                                                                                                                                         |
| Article Type:                   | Original research                                                                                                                                                                                                                                                                              |
| Date Submitted by the Author:   | 13-Aug-2022                                                                                                                                                                                                                                                                                    |
| Complete List of Authors:       | Raban, Magdalena; Macquarie University<br>Gonzalez, Gabriela; Macquarie University<br>Nguyen, A; Macquarie University; St Vincent's Clinical School<br>Newell, Ben; UNSW<br>Li, Ling; Macquarie University<br>Seaman, Karla ; Macquarie University<br>Westbrook, Johanna; Macquarie University |
| <b>Primary Subject Heading</b>: | Health services research                                                                                                                                                                                                                                                                       |
| Secondary Subject Heading:      | Infectious diseases, Public health, General practice / Family practice                                                                                                                                                                                                                         |
| Keywords:                       | Quality in health care < HEALTH SERVICES ADMINISTRATION & MANAGEMENT, Public health < INFECTIOUS DISEASES, PRIMARY CARE, Respiratory infections < THORACIC MEDICINE, INFECTIOUS DISEASES                                                                                                       |
|                                 |                                                                                                                                                                                                                                                                                                |

SCHOLARONE™  
Manuscripts



I, the Submitting Author has the right to grant and does grant on behalf of all authors of the Work (as defined in the below author licence), an exclusive licence and/or a non-exclusive licence for contributions from authors who are: i) UK Crown employees; ii) where BMJ has agreed a CC-BY licence shall apply, and/or iii) in accordance with the terms applicable for US Federal Government officers or employees acting as part of their official duties; on a worldwide, perpetual, irrevocable, royalty-free basis to BMJ Publishing Group Ltd ("BMJ") its licensees and where the relevant Journal is co-owned by BMJ to the co-owners of the Journal, to publish the Work in this journal and any other BMJ products and to exploit all rights, as set out in our [licence](#).

The Submitting Author accepts and understands that any supply made under these terms is made by BMJ to the Submitting Author unless you are acting as an employee on behalf of your employer or a postgraduate student of an affiliated institution which is paying any applicable article publishing charge ("APC") for Open Access articles. Where the Submitting Author wishes to make the Work available on an Open Access basis (and intends to pay the relevant APC), the terms of reuse of such Open Access shall be governed by a Creative Commons licence – details of these licences and which [Creative Commons](#) licence will apply to this Work are set out in our licence referred to above.

Other than as permitted in any relevant BMJ Author's Self Archiving Policies, I confirm this Work has not been accepted for publication elsewhere, is not being considered for publication elsewhere and does not duplicate material already published. I confirm all authors consent to publication of this Work and authorise the granting of this licence.

1  
2  
3  
4 **Nudge interventions to reduce unnecessary antibiotic prescribing in primary care: a**  
5  
6 **systematic review**  
7  
8  
9

10  
11 Magdalena Z. Raban<sup>1\*</sup>, Gabriela Gonzalez<sup>1</sup>, Amy D. Nguyen<sup>1,2</sup>, Ben R. Newell<sup>3</sup>, Ling Li<sup>1</sup>,

12  
13 Karla Seaman<sup>1</sup>, Johanna I Westbrook<sup>1</sup>  
14  
15

16  
17 <sup>1</sup>Centre for Health Systems and Safety Research, Australian Institute of Health Innovation,  
18 Macquarie University, Sydney, Australia.  
19

20 <sup>2</sup>St Vincent's Clinical School, UNSW Medicine, UNSW Sydney, NSW, Australia  
21

22 <sup>3</sup>School of Psychology, UNSW, Sydney, Australia.  
23  
24  
25

26  
27 \*Corresponding author:  
28

29 Dr Magdalena Raban, Senior Research Fellow  
30 Centre for Health Systems and Safety Research, Australian Institute of Health Innovation,  
31 Macquarie University, Sydney, Australia.  
32

33 [magda.raban@mq.edu.au](mailto:magda.raban@mq.edu.au)  
34  
35  
36  
37  
38  
39  
40  
41  
42  
43  
44  
45  
46  
47  
48  
49  
50  
51  
52  
53  
54  
55  
56  
57  
58  
59  
60

## ABSTRACT

### Objectives

Antibiotic prescribing in primary care contributes significantly to antibiotic overuse. Nudge interventions alter the decision-making environment to achieve behaviour change without restricting options. Our objectives were to conduct a systematic review to describe the types of nudge interventions used to reduce unnecessary antibiotic prescribing in primary care, their key features, and their effects on antibiotic prescribing overall.

### Methods

Medline, Embase and grey literature were searched for randomised trials or regression discontinuity studies in April 2021. Risk of bias was assessed independently by two researchers using the Cochrane Effective Practice and Organisation of Care group's tool. Results were synthesised to report the percentage of studies demonstrating a reduction in overall antibiotic prescribing for different types of nudges. Effects of social norm nudges were examined for features that may enhance effectiveness.

### Results

Nineteen studies were included, testing 23 nudge interventions. Four studies were rated as having a high risk of bias, nine as moderate risk of bias, and six as at low risk. Overall, 78.3% (n=23, 95% CI: 58.1, 90.3) of the nudges evaluated resulted in a reduction in overall antibiotic prescribing. Social norm feedback was the most frequently applied nudge (n=17), with 76.5% (n=13; 95% CI: 52.7, 90.4) of these studies reporting a reduction. Other nudges applied were changing option consequences (n=3; with 2 reporting a reduction), providing

1  
2  
3 reminders (n=2; 1 reporting a reduction), and facilitating commitment (n=1; reporting a  
4  
5 reduction). Successful social norm nudges typically either included an injunctive norm,  
6  
7 compared prescribing to physicians with the lowest prescribers or targeted high prescribers. .  
8  
9

## 10 11 12 **Conclusions**

13  
14 Nudge interventions are effective for improving antibiotic prescribing in primary care.  
15  
16 Expanding the use of nudge interventions beyond social norm nudges could reap further  
17  
18 improvements in antibiotic prescribing practices. Policy-makers and managers need to be  
19  
20 mindful how social norm nudges are implemented to enhance intervention effects.  
21  
22  
23  
24  
25

## 26 **STRENGTHS AND LIMITATIONS**

- 27  
28 • This study employed a broad search strategy and the assessment of whether an intervention was a  
29  
30 nudge was conducted at the full-text stage.
- 31  
32 • Implementation features of social norm nudges were extracted from the studies.
- 33  
34 • We were not able to synthesise results with meta-analysis due to the differences in outcome  
35  
36 measures reported.  
37  
38  
39  
40  
41

## 42 **KEYWORDS**

43  
44 Antimicrobial Stewardship; Primary Health Care; General Practice; Clinical Decision-  
45  
46 Making; Quality of Health Care; Economics, Behavioural; Psychology; Systematic Review;  
47  
48  
49  
50  
51  
52  
53  
54  
55  
56  
57  
58  
59  
60

## INTRODUCTION

Antimicrobial resistance is one of the most pressing challenges to global health [1]. Overuse and inappropriate use of antibiotics is a major contributor to the rise of antimicrobial resistance, and yet, between 2000 and 2010 global antibiotic consumption rose by 35% [2]. Concerningly, global per-capita consumption of antibiotics flagged by the World Health Organization (WHO) as having high resistance potential (Watch category) [3] rose by 90.9% between 2000 and 2015 [4]. Primary care accounts for the majority of antibiotic use, and rates of inappropriate use are estimated to be high [5-7]. For example, the majority of upper respiratory tract infections do not benefit from antibiotic treatment, particularly when weighed against the rates of adverse effects, however, antibiotics continue to be prescribed [5, 8, 9].

Efforts to reduce antibiotic prescribing in primary care have predominantly focused on the use of point-of-care testing, shared decision-making, and education strategies aimed at physicians and patients [10-12]. While some of these intervention strategies have been successful in improving antibiotic prescribing, they can be resource intensive, and in some cases only provide marginal reductions in antibiotic prescribing [10-12]. Furthermore, these intervention strategies rarely take account of how cues in the environment, unrelated to clinician knowledge or access to resources such as information or tests, can influence decision-making.

The field of behavioural economics has generated a collection of approaches, called ‘nudges’, that involve subtle changes in the decision-making environment, or choice architecture, to guide people towards a specific decision or behaviour. Nudge interventions are typically simple and low-cost interventions, and thus are attractive to healthcare managers and policy

1  
2  
3 makers. Furthermore, they do not restrict choices or penalise ‘unfavourable’ choices, thus  
4  
5 preserving an individual’s autonomy in the decision-making process. Examples of nudge  
6  
7 interventions include changing default settings, changing option consequences, and providing  
8  
9 reminders during the decision-making process.  
10  
11  
12  
13

14  
15 Nudge interventions have similarities to traditional behaviour change techniques applied in  
16  
17 health services and public health.[13, 14] For example, audit and feedback has long been  
18  
19 applied in health service interventions and has similarities to social norm feedback nudges.  
20  
21 However, audit and feedback may not necessarily include a comparison to the performance  
22  
23 of peers, the essential component that would make it a nudge.[15, 16] Furthermore, social  
24  
25 norm feedback nudges tend to target ‘underperformers’, as evidence from psychology has  
26  
27 demonstrated a ‘boomerang’ effect; i.e. that high performers drop their performance toward  
28  
29 the group mean (beyond that expected due to regression toward the mean).[17] However,  
30  
31 audit and feedback interventions used in health services may not take performance into  
32  
33 account when deciding on who should receive feedback. Thus, there can be nuanced  
34  
35 differences in the techniques from each of these paradigms.  
36  
37  
38  
39  
40  
41

42  
43 Nudge interventions have been successfully implemented in fields other than health [18], and  
44  
45 the evidence base for their use in influencing consumers’ health-related behaviours is  
46  
47 growing [19, 20]. However, while the use of nudge interventions in specific areas of health  
48  
49 services and to influence clinical decision making is increasing,[18, 21] there is emerging  
50  
51 evidence that the effect of nudges can vary depending on the context in which they are  
52  
53 applied, as well as the type of nudge implemented [22, 23]. Against this background, our aim  
54  
55 was to explore the use of nudge interventions and their effectiveness to improve antibiotic  
56  
57 prescribing in primary care, and to draw out lessons to inform future directions for nudge  
58  
59  
60



1  
2  
3 intervention design and testing in healthcare. Our specific objectives were to describe the  
4 types of nudge interventions trialled to date, their key features, and their effects on the rates  
5 of antibiotic prescribing overall, in order to elucidate “what kind of nudges work best in this  
6 ... setting?”[22].  
7  
8  
9  
10  
11  
12  
13  
14  
15

## 16 **METHODS**

17  
18  
19 This systematic review is reported in accordance with the Preferred Reporting Items for  
20 Systematic Reviews and Meta-Analyses (PRISMA) statement (Supplementary file 1) [24].  
21  
22  
23  
24  
25  
26  
27  
28  
29

### 30 **Information sources and search strategy**

31  
32  
33 The databases MEDLINE (via Ovid and PubMed) and Embase were searched for original  
34 research articles reporting on randomised trials or regression discontinuity studies of  
35 interventions to improve antibiotic prescribing in primary care, published in English in the  
36 last 20 years. Though the behavioural economics term ‘nudge’ was proposed in 2008, many  
37 of the interventions now termed ‘nudges’ have been applied to influence behaviour prior to  
38 the emergence of this term. Therefore, we did not exclude articles published before 2008 if  
39 the interventions met the criteria for a nudge intervention, and our search strategy did not  
40 include ‘nudges’ as a theme. Instead, our search strategy covered three themes: antibiotics  
41 AND primary care AND intervention study designs. The reference lists of included studies  
42  
43  
44  
45  
46  
47  
48  
49  
50  
51  
52  
53  
54  
55  
56  
57  
58  
59  
60

1  
2  
3  
4 were hand searched for relevant citations. Websites of government nudge units and other  
5  
6  
7 organisations working to apply and test nudge theory were also searched for grey literature of  
8  
9  
10 relevance. Searches were carried out in April 2021. The full search strategy is presented in  
11  
12  
13  
14 Supplementary file 2.

### 23 **Eligibility criteria**

24  
25  
26  
27 Studies conducted in primary care facilities, general and family practices were included.

28  
29  
30 Studies in hospital wards or in long-term care were excluded. The intervention tested had to  
31  
32  
33 fall under the broad definition of a nudge proposed by Thaler and Sunstein: “*A nudge... is*  
34  
35  
36 *any aspect of the choice architecture that alters people’s behaviour in a predictable way*  
37  
38 *without forbidding any options or significantly changing their economic incentives. To count*  
39  
40  
41 *as a mere nudge, the intervention must be easy and cheap to avoid*” [25]. For further  
42  
43  
44 guidance on whether the intervention used qualified as a nudge, we used a taxonomy of  
45  
46  
47 choice architecture techniques which focuses on interventions rather than the underlying  
48  
49  
50 cognitive processes of the interventions [26]. Interventions involving education, providing  
51  
52  
53 physicians with access to guidelines, passive decision support tools the clinician had to  
54  
55  
56 actively decide to use, and audit and feedback interventions with no social norm comparison  
57  
58  
59  
60

1  
2  
3 were excluded. Studies evaluating multifaceted interventions that included a nudge strategy  
4  
5  
6 were also excluded as they did not allow evaluation of the impact of the nudge intervention  
7  
8  
9  
10 alone. Studies had to evaluate the impact of the intervention on antibiotic prescribing rates or  
11  
12 rates of appropriate antibiotic prescribing to be eligible. Randomised controlled trials and  
13  
14 regression discontinuity studies were included. Regression discontinuity studies allow  
15  
16  
17 assessment of causality in studies where a cut-off point is used to allocate an intervention.  
18  
19  
20  
21 This is of particular relevance to social norm nudges, where, e.g. the bottom 10% performers  
22  
23  
24 are targeted by an intervention. Studies have shown that regression discontinuity studies have  
25  
26  
27 similar effect estimates to randomised trials, though they require a large sample size.[27, 28]  
28  
29  
30  
31 Interrupted time-series, controlled before-after, cross-sectional, and before-after studies were  
32  
33  
34 excluded as they are at higher risk of bias.  
35  
36  
37  
38  
39  
40  
41  
42  
43  
44  
45  
46

### 47 **Study selection**

48  
49  
50 Titles and abstracts of citations returned from the searches were independently reviewed by at  
51  
52  
53 least two reviewers. At this stage, the reviewers assessed study setting, study design and  
54  
55  
56  
57 outcomes for eligibility. The full-text of all selected citations were then reviewed  
58  
59  
60

1  
2  
3  
4 independently by two of three authors against all eligibility criteria, including an assessment  
5  
6  
7 of whether the intervention qualified as a nudge using the definitions outlined above.  
8  
9

10 Discrepancies between reviewers were resolved through discussions until consensus was  
11  
12  
13 reached.  
14  
15  
16  
17  
18  
19

### 20 **Data collection and data items**

21  
22  
23 Data extraction and categorisation of interventions was carried out independently by two  
24  
25  
26 reviewers for each study. We extracted data on study characteristics (country, study years,  
27  
28  
29 sample size), nudge intervention description, types of infections targeted (e.g. all, respiratory  
30  
31  
32 tract infections [RTIs], urinary tract infections [UTIs]), outcomes, and study results. When  
33  
34  
35 studies reported more than one outcome, we extracted results for the outcome measuring  
36  
37  
38 changes in overall antibiotic use, appropriate antibiotic use, and any outcome defined as the  
39  
40  
41 primary outcome of the study. When a study trialled more than one nudge intervention, we  
42  
43  
44  
45  
46  
47 extracted intervention data on the impact of each nudge individually.  
48  
49  
50  
51  
52  
53

54 Nudge interventions were classified using a taxonomy of choice architecture techniques  
55  
56  
57 (Table 1) [26], and we refer to these as nudge intervention categories.  
58  
59  
60

Table 1: Taxonomy of choice architecture techniques with implementation examples[26]

| Category                | Technique                                  | Technique examples                                                                                                                  |
|-------------------------|--------------------------------------------|-------------------------------------------------------------------------------------------------------------------------------------|
| A. Decision information | A1. Translate information                  | <ul style="list-style-type: none"> <li>Reframe information</li> <li>Simplify information</li> </ul>                                 |
|                         | A2. Make information visible               | <ul style="list-style-type: none"> <li>Provide real-time feedback</li> <li>Make external information visible</li> </ul>             |
|                         | A3. Provide social reference point         | <ul style="list-style-type: none"> <li>Refer to descriptive norm (social norm feedback)</li> <li>Refer to opinion leader</li> </ul> |
| B. Decision structure   | B1. Change choice defaults                 | <ul style="list-style-type: none"> <li>Set no-action default</li> <li>Use prompted choice</li> </ul>                                |
|                         | B2. Change option-related effort           | <ul style="list-style-type: none"> <li>Increase/decrease physical effort</li> <li>Increase/decrease financial effort</li> </ul>     |
|                         | B3. Change range or composition of options | <ul style="list-style-type: none"> <li>Change categories of options</li> <li>Change grouping of options</li> </ul>                  |
|                         | B4. Change option consequences             | <ul style="list-style-type: none"> <li>Connect decision to benefit or cost</li> <li>Change social consequences</li> </ul>           |
| C. Decision assistance  | C1. Provide reminders                      | <ul style="list-style-type: none"> <li>Make information more or less salient</li> </ul>                                             |
|                         | C2. Facilitate commitment                  | <ul style="list-style-type: none"> <li>Support self-commitment/public commitment</li> </ul>                                         |

Social norm feedback nudge interventions are a frequent behaviour change technique in healthcare, often termed audit and feedback. Social norm feedback involves providing people with feedback on their performance relative to their peers. However, this can be implemented in a variety of way. For example, the comparison can be descriptive or injunctive, i.e. associating a judgement to the performance. Psychology and health research has shown that

1  
2  
3 certain features may enhance social norm feedback interventions,[15-17, 29] and thus, we  
4  
5  
6  
7 extracted details of how social norm nudges were implemented (Box 1), with the aim that this  
8  
9  
10 may further elucidate the important features of effective social norm nudges to reduce  
11  
12  
13  
14 antibiotic prescribing in primary care.  
15  
16  
17  
18  
19  
20  
21  
22  
23  
24  
25  
26  
27  
28  
29

30 **Box 1: Social norm feedback nudge features extracted from studies**

- Target of intervention: high antibiotic prescribers or all physicians
- The comparison group (average of group, top performers or rank within peers)
- Use of injunctive or descriptive norm
- Frequency of feedback
- For studies with more than one round of feedback: whether the norm for comparison was static or dynamic (i.e. did it change as the outcome change?)
- Use of a static norm or dynamic norm (i.e. one that changes with group performance)
- Whether feedback was based on prescribing data for practices or individual physicians
- Whether the reported performance was relative or absolute
- Was the antibiotic use reported on for all antibiotics or for diagnoses where antibiotic use is inappropriate
- The mode of intervention delivery (e.g. letter, email, meeting)
- Whether a graphic representation of data was included
- Whether supporting information was provided to aid behaviour change

52  
53  
54  
55  
56 **Assessment of risk of bias in included studies**  
57  
58  
59  
60

1  
2  
3  
4 The risk of bias of each study was assessed using the Cochrane Effective Practice and  
5  
6  
7 Organisation of Care group's tool for studies with a separate control group [30]. Each study  
8  
9  
10 was independently assessed by two authors against each of the nine criteria assigning a score  
11  
12  
13 of either low risk, high risk, or unclear risk of bias. Discrepancies were resolved through  
14  
15  
16 discussion. A summary assessment of the overall risk of bias was allocated to each study as  
17  
18  
19 follows: *low risk of bias* when all criteria were scored 'low', *medium risk of bias* when one  
20  
21  
22 or two criteria were scored 'unclear' or 'high' risk, and *high risk* when more than two criteria  
23  
24  
25 scored 'unclear' or 'high' [31].  
26  
27  
28  
29  
30  
31  
32

### 33 **Synthesis of results**

34  
35  
36  
37 Inconsistencies in the outcomes and data reported in the studies precluded meta-analysis.  
38

39  
40 Thus, we applied vote counting to summarise results for each category of nudge intervention  
41  
42  
43 and for features of social norm feedback nudges [32]. Vote counting allows a comparison of  
44  
45  
46 the number of effects reporting a benefit to the number that showed no benefit. It is the  
47  
48  
49 recommended method by Cochrane for summarising studies when meta-analysis or other  
50  
51  
52 quantitative methods are not able to be applied [32]. For each nudge intervention, we  
53  
54  
55  
56  
57 recorded whether the study demonstrated a reduction or no change in overall antibiotic  
58  
59  
60

1  
2  
3 prescribing compared to controls. As per the Cochrane Handbook, the statistical significance  
4  
5  
6 of the effect was not taken into account, so as not to erroneously conclude that underpowered  
7  
8  
9 studies had no effect. For studies with multiple study outcomes, we only considered the effect  
10  
11  
12 on overall antibiotic prescribing. The percentage of interventions with a reduction in overall  
13  
14  
15 antibiotic prescribing was calculated for all nudge interventions and social norm feedback  
16  
17  
18 nudges. Sensitivity analyses were conducted removing studies with a high risk of bias.  
19  
20  
21  
22  
23 Confidence intervals for proportions were calculated using the Wilson method. Effect sizes  
24  
25  
26 from studies were summarised narratively by reporting the range of change for overall  
27  
28  
29  
30 antibiotic prescribing outcomes.  
31  
32  
33  
34  
35  
36

37 We used harvest plots to graphically summarise the vote counting results [33]. In a harvest  
38  
39  
40 plot, each mark represents a study or intervention. We used the position of the mark to  
41  
42  
43 indicate whether the intervention effect (reduction or no change in overall antibiotic  
44  
45  
46 prescribing) and the size of the mark to indicate the risk of bias of the study (low risk studies  
47  
48  
49 having a larger mark). Harvest plots were created for all nudge interventions by nudge  
50  
51  
52 category, and for social norm nudges by whether the intervention targeted high antibiotic  
53  
54  
55 prescribers or all prescribers, whether the comparison group was the average or above  
56  
57  
58  
59  
60



1  
2  
3  
4 average performers, and whether the feedback was a descriptive or injunctive norm. These  
5  
6  
7 features were chosen as there is evidence from the psychology literature that they play an  
8  
9  
10 important role in intervention effects and avoid possible negative impacts, such as the  
11  
12  
13 boomerang effect. Thus, the stratification of the social norm nudge interventions by these  
14  
15  
16 features aimed to examine if there was evidence these features were important for  
17  
18  
19 intervention effects in the context of antibiotic prescribing in primary care. Lastly, results  
20  
21  
22 from studies that directly compared different nudge interventions, social norm nudge  
23  
24  
25 implementation strategies, or examined intervention effects over time or on different sub-  
26  
27  
28 groups, were described narratively.  
29  
30  
31  
32  
33  
34  
35  
36

### 37 **Public and patient involvement**

38  
39  
40 Patients or the public were not involved.  
41  
42  
43  
44  
45  
46

## 47 **RESULTS**

48  
49  
50 Nineteen studies were assessed as eligible for inclusion (Figure 1) [34-49]. Table 2 presents  
51  
52  
53 study characteristics. One study was a pilot study [46] of a larger trial [44], but was included  
54  
55  
56 as a separate study as it was conducted in a different population. The majority of studies were  
57  
58  
59  
60

1  
2  
3 conducted in Europe (n=8) [36, 38-41, 47, 48], six in the United States [37, 42-44, 46], two in  
4  
5  
6  
7 Australia [35, 45], two in China [49], and one in Sudan [34]. Seventeen studies were  
8  
9  
10 randomised controlled trials and two were regression discontinuity studies [36, 47].  
11  
12

13 Interventions were aimed at improving antibiotic use for all types of infections in nine studies  
14  
15  
16 [34-36, 38, 39, 45, 47], RTIs in eight studies [37, 42-44, 46, 48, 49], UTIs in one study [41],  
17  
18  
19 and both RTIs and UTIs in one study [40].  
20  
21  
22  
23  
24  
25  
26

### 27 **Risk of bias in included studies**

28  
29  
30 Four studies were rated as having a high overall risk of bias [34, 37, 41, 46], nine as moderate  
31  
32  
33 risk of bias [35, 36, 40, 43-45, 47, 48], and six as at low risk of bias (Table 2) [38, 39, 42,  
34  
35  
36  
37 49]. Overall scores of meeting risk of bias criteria ranged from 4/9 to 9/9 across studies. No  
38  
39  
40 single criterion was more frequently at high or unclear risk of bias across studies.  
41  
42  
43

44 Supplementary file 3 shows the risk of bias assessment against each of the criteria for each  
45  
46  
47 study.  
48  
49  
50  
51  
52  
53  
54  
55  
56

### 57 **Description of nudge interventions**

58  
59  
60

1  
2  
3  
4 Seventeen studies evaluated one type of nudge intervention and two evaluated three types of  
5  
6  
7 nudge interventions each [43, 44], with a total of 23 nudge interventions evaluated. Three  
8  
9  
10 studies compared different features of social norm nudges[35, 42].  
11  
12  
13

14  
15  
16 Social norm feedback nudges ('Decision information' category of nudge interventions) were  
17  
18 the most common intervention (n=17) evaluated [34-42, 44-48]. Implementation of social  
19  
20 norm feedback varied between studies (Figure 2). Social norm feedback was most  
21  
22 commonly: sent to all prescribers (n=11) [34, 37, 40-42, 45, 46, 48] as opposed to the highest  
23  
24 prescribers only [35, 36, 38, 39, 47, 50, 51]; and compared prescribing to the group average  
25  
26 (n=12) [34-36, 38, 40, 41, 45, 47, 48, 50]. Only four studies used an injunctive norm, which  
27  
28 also provided a positive reinforcement to those performing well.[41, 44, 46, 52] Feedback  
29  
30 was typically provided more than once (n=11) [34, 37, 39-41, 44-46]; based on prescribing  
31  
32 data for individual physicians (n=12) [35, 37, 39, 41, 42, 44-48]; and distributed via letters  
33  
34 (n=11) [34-36, 38-40, 42, 45, 47, 48]. Studies also cited application of other behavioural  
35  
36 techniques or considerations in the design of their social norm feedback, such as the inclusion  
37  
38 of actionable advice, and addressing the feedback letter from a high profile or respected  
39  
40 individuals.  
41  
42  
43  
44  
45  
46  
47  
48  
49  
50  
51  
52  
53  
54  
55  
56  
57  
58  
59  
60

Three interventions used nudge techniques from the 'Decision structure' category involving changing option consequences (Table 3) [44, 46, 49]. Three interventions used techniques from the 'Decision assistance' category (Table 3) involving providing reminders via suggested alternatives to antibiotic use (n=2) [44, 46] and a statement of public commitment to reducing antibiotic use in RTIs (n=1) [43].

Table 3: Description of nudge and direction of effect on overall antibiotic prescribing in primary care (other than social norm feedback)

| Nudge category/<br>Author,<br>year                     | Type of nudge             | Mode                     | Description                                                                                                                                                                                                                | Intervention effect* |
|--------------------------------------------------------|---------------------------|--------------------------|----------------------------------------------------------------------------------------------------------------------------------------------------------------------------------------------------------------------------|----------------------|
| <b>Decision structure – change option consequences</b> |                           |                          |                                                                                                                                                                                                                            |                      |
| Meeker, 2016                                           | Accountable justification | Electronic health record | At time of prescribing an antibiotic, physicians were asked to justify their treatment decision in a mandatory free text field. The prompt informed physicians the justification would be visible in the patient's record. | Reduction            |
| Persell, 2016                                          | Accountable justification | Electronic health record | At time of prescribing an antibiotic, physicians were asked to justify their treatment decision in a mandatory free text field. The prompt informed physicians the justification would be visible in the patient's record. | No change            |
| Yang, 2014                                             | Public reporting          | Posters and reports      | Posters with antibiotic prescribing data were publicly displayed in the primary care clinics and reports with the data were sent to clinic managers and local health authorities.                                          | Reduction            |
| <b>Decision assistance – provide reminders</b>         |                           |                          |                                                                                                                                                                                                                            |                      |
| Meeker, 2016                                           | Suggested alternatives    | Electronic health record | At time of prescribing an antibiotic, a pop-up screen stated antibiotics are generally not indicated for the diagnosis and showed a list of alternative treatments.                                                        | Reduction            |
| Persell, 2016                                          | Suggested alternatives    | Electronic health record | At time of prescribing an antibiotic, a computerised order set appeared with treatment alternatives and education materials for the patient.                                                                               | Reduction            |

| Decision assistance – facilitate commitment |                   |        |                                                                                                                                    |           |
|---------------------------------------------|-------------------|--------|------------------------------------------------------------------------------------------------------------------------------------|-----------|
| Meeker, 2014                                | Public commitment | Poster | A poster-sized letter signed by physicians and posted in examination rooms indicating commitment to reducing antibiotics for RTIs. | Reduction |

\*Results of vote counting assessment based on nudge effect on overall antibiotic prescribing

### Effect of nudge interventions on overall antibiotic prescribing rates

Of the 23 nudge interventions evaluated, 78.3% (n=17, 95% CI: 58.1, 90.3) showed a reduction in overall antibiotic prescribing rates. Removing studies with a high risk of bias, the percentage of studies showing a reduction in overall antibiotic prescribing was 76.5% (n=12, 95% CI: 52.7, 90.4). Figure 3 shows the distribution of intervention effects by the type of nudge strategy evaluated.

Of the seventeen studies evaluating social norm feedback nudges, 76.5% (n=13, 95% CI: 52.7, 90.4) reported a reduction in overall antibiotic prescribing (Figure 3). Removing studies with a high risk of bias, this percentage was 69.2% (n=9, 95% CI: 42.4, 87.3). Figure 4 shows social norm nudges stratified by whether they targeted only high prescribers or all prescribers, the comparison group and the use of an injunctive or descriptive norm. All but two (83%) studies targeting high prescribers or using an injunctive norm or a comparison to

1  
2  
3  
4 low prescribers reported a reduction in overall prescribing. Whereas 60% of studies without  
5  
6  
7 these features reported a reduction in antibiotic prescribing.  
8  
9

### 11 **Effect size of nudge interventions on antibiotic prescribing rates**

12  
13  
14  
15 The effect sizes of social norm feedback interventions on the number of antibiotics/1000  
16  
17  
18 consultations (n=3) ranged from no change [45] to a reduction of 13.6% (95% CI: 16.6, 10.6)  
19  
20  
21 at 6-months post-intervention [35]; and the number of antibiotic prescriptions/1000 registered  
22  
23  
24 population (n=5) from no change [51] to an approximate 5% reduction (-58.7/1000  
25  
26  
27 population [95% CI: 116.7, 0.7]) 12-months post intervention [36].  
28  
29  
30  
31  
32  
33  
34

35 Studies measuring antibiotic prescribing for specific infection types reported absolute  
36  
37  
38 difference effect sizes of -1.2% (95% CI: -10.5, 8.2) [40], -1.7% (p=0.93) [37], and -5.2%  
39  
40  
41 (95% CI: -6.9, -1.6) [44] in the proportion of upper RTI treated with an antibiotic; a relative  
42  
43  
44 decrease of 9.6% (p=0.0004) [41] in inappropriate antibiotic for UTIs, and lower odds of  
45  
46  
47 antibiotic prescribing for RTI (OR: 0.73 (95% CI: 0.53, 0.995)) [46].  
48  
49  
50  
51  
52  
53  
54

55 The effect sizes of the two studies of accountable justification interventions ranged from no  
56  
57  
58 change [46] to a reduction of 7.0 percentage points (95% CI: 9.1, 2.9) [44] in the number of  
59  
60

1  
2  
3 antibiotics/100 antibiotic inappropriate infections. One study of public reporting showed a  
4  
5  
6  
7 1.93 percentage point reduction (95% CI: -6.61, 2.75) in the percentage of RTI consultations  
8  
9  
10 with an antibiotic, and a 6.97 percentage point (95% CI: -13.9, 0.00) reduction in the  
11  
12  
13 percentage of RTI consultations with >1 antibiotic.  
14  
15  
16  
17  
18  
19

20 Supplementary file 4 provides details of the effects of interventions on outcomes.  
21  
22  
23  
24  
25  
26

### 27 **Studies comparing the effects of different nudge interventions**

28  
29

30 Two studies compared the impact of three different types of nudge interventions on antibiotic  
31  
32  
33 prescribing for RTIs [44, 46]. One study (with a moderate risk of bias) examined the impact  
34  
35  
36 of nudges on RTI where an antibiotic was not indicated, i.e. antibiotic inappropriate RTIs  
37  
38  
39 [44]. This study reported a reduction in the prescribing of antibiotics for antibiotic  
40  
41  
42 inappropriate RTIs in the physician groups receiving social norm feedback and accountable  
43  
44  
45 justification nudges, and a non-significant reduction in the physician group receiving a  
46  
47  
48 suggested alternatives nudge intervention [44]. The second study (high risk of bias) compared  
49  
50  
51 the same three nudge interventions, and reported a reduction in antibiotic prescribing for all  
52  
53  
54  
55  
56  
57  
58  
59  
60

1  
2  
3  
4 RTIs for the social norm feedback and suggested alternative nudges, but not in the groups  
5  
6  
7 receiving the accountable justification nudges [46].  
8  
9

10  
11  
12  
13 Supplementary file 4 provides details of the impact of interventions on outcomes and their  
14  
15  
16  
17 vote counting results.  
18  
19

### 20 21 22 23 **Social norm nudge effects over time and following repeat messaging** 24

25  
26  
27 Two studies examined the effect of a single social norm nudge letter sent to high antibiotic  
28  
29  
30 prescribing physicians over time and both reported a diminishing effect on prescribing rates  
31  
32  
33 compared to controls over time [35, 36]. In one study, the effect of the intervention was  
34  
35  
36 examined over 12-months after the letter was sent [36]. While there was a significant  
37  
38  
39 reduction in antibiotic prescribing compared to controls in the 12 months after the  
40  
41  
42 intervention, the effect diminished over time, such that the reductions in antibiotic  
43  
44  
45 prescribing rates in the second, third and fourth quarters after the intervention were not  
46  
47  
48 statistically significant. The second study also reported a diminishing effect of the social  
49  
50  
51 norm nudge letter over a 12-month period, but the reduction continued to remain significant  
52  
53  
54 at 12-months after the intervention [35, 50].  
55  
56  
57  
58  
59  
60



1  
2  
3  
4  
5  
6  
7 Two studies examined the impact of repeat social norm feedback interventions over time [39,  
8  
9  
10 47]. In the first study, the effect of quarterly social norm feedback sent to the top 50% of  
11  
12  
13 antibiotic prescribers was assessed for 2 years [39]. While there was no difference in overall  
14  
15  
16 antibiotic prescribing rates in the first and second years of the intervention, there was a  
17  
18  
19 significant reduction in the antibiotic prescribing for children and adolescents in the first year  
20  
21  
22 (-8.6%) and young to middle-aged adults in the second year of the intervention (-4.6%).  
23  
24  
25  
26  
27 In the second study, a social norm nudge was first used in 2014 targeting the top 20%  
28  
29  
30 antibiotic prescribers, and due to its success was repeated annually since [47]. The study  
31  
32  
33 evaluated whether the intervention reduced antibiotic prescribing by physicians who had  
34  
35  
36 previously received the letter and those that had not. The top 10% of prescribers did not  
37  
38  
39 reduce their prescribing whether or not they had previously been sent a letter. However, the  
40  
41  
42 top 11-20% antibiotic prescribers reduced their antibiotic prescribing even when they had  
43  
44  
45 previously been sent a letter. The authors speculated that the failure of the top 10% to reduce  
46  
47  
48 antibiotic prescribing may have been due to the more forceful message in the communication  
49  
50  
51 they received (i.e. that the great majority (90%) of practices prescribed fewer antibiotics),  
52  
53  
54  
55  
56  
57  
58  
59  
60

1  
2  
3 resulting in negative attitudes to the message and a lower behavioural intention to reduce  
4  
5  
6  
7 prescribing.  
8  
9  
10  
11  
12

## 13 **DISCUSSION**

14  
15  
16 In this systematic review we have compiled the evidence on the effectiveness of nudge  
17 interventions in reducing antibiotic prescribing in primary care. Overall, 78.3% of studies  
18 reported a reduction in antibiotic prescribing. Social norm feedback was the most frequently  
19 evaluated nudge, and the evidence suggests that comparisons should include an aspirational  
20 target, injunctive norm or target high prescribers to enhance intervention effects. However,  
21 future research should explore the types of features that will further enhance social norm  
22 feedback nudges in this context. Only four studies examined nudge strategies other than  
23 social norm nudges, such as changing option consequences, providing reminders and  
24 facilitating commitment, thus further research is also needed to evaluate other nudge  
25 strategies despite promising results thus far of their effectiveness.  
26  
27  
28  
29  
30  
31  
32  
33  
34  
35  
36  
37  
38  
39  
40  
41

42 The studies included in this review trialled five different nudges (social norm feedback,  
43 accountable justification, public reporting, suggested alternatives and public commitment)  
44 from four of the nine subcategories of choice architecture techniques described by Munscher  
45 [26]. Two other broad reviews of nudges targeting health providers reported identifying a  
46 similar number of nudges employed in their included studies, but the types of nudges applied  
47 differed to those that we identified.[21, 53] For example, changing choice defaults is a  
48 frequently applied nudge to guide health care provider behaviour, but was not used to  
49 influence antibiotic prescribing in our review.[21, 53] Another example of a nudge not  
50  
51  
52  
53  
54  
55  
56  
57  
58  
59  
60

1  
2  
3 applied in studies in our review, but used in other contexts targeting health providers is  
4  
5 changing the framing of information.[21, 53] Thus, there is scope for implementing and  
6  
7 evaluating other nudge techniques in the primary care setting to improve antibiotic use. This  
8  
9 is important since it is currently not clear whether the same nudge applied over more than one  
10  
11 year will continue to have sustained impact.  
12  
13  
14

15  
16  
17 We attempted to elucidate whether features of social norm feedback nudges have a role in  
18  
19 their effectiveness. For example, the behavioural economics literature suggests that social  
20  
21 norm nudges should only be provided to poor performers (i.e. high antibiotic prescribers in  
22  
23 our case).[25] This is because of the ‘boomerang effect’ that may occur in individuals  
24  
25 performing above average when they are provided social norm feedback confirming their  
26  
27 above average performance, i.e. they reduce their performance. The studies in our review  
28  
29 most frequently provided the social norm feedback to all prescribers (not only high  
30  
31 prescribers) and all but one of these studies showed a reduction in overall antibiotic  
32  
33 prescribing. However, the studies providing feedback to all prescribers also predominantly  
34  
35 provided feedback more than once, which may have played a role in the reduction in  
36  
37 antibiotic prescribing. Other factors that may have played a role in the prevention of a  
38  
39 ‘boomerang’ effect in low prescribers, was the way the use of an injunctive norm and the  
40  
41 comparison group used in the feedback. For example, one study informed the physicians with  
42  
43 the lowest prescribing that they were a ‘top performer’, whereas the remaining physicians  
44  
45 were informed they were ‘not a top performer’ [44]. The psychology literature supports the  
46  
47 use of an injunctive norm when providing feedback i.e. conveying social approval or  
48  
49 disapproval, as a way to eliminate the ‘boomerang’ effect [17]. The study also compared  
50  
51 physicians’ performance to the mean of the lowest decile prescribers, rather than the group  
52  
53 mean [44]. Our results showed that comparison of performance to the group mean, use of a  
54  
55  
56  
57  
58  
59  
60

1  
2  
3 descriptive norm and targeting all prescribers produced mixed results with three of five  
4 studies reporting a reduction in antibiotic prescribing. Thus, our results support the use of  
5 injunctive norms, comparisons to the lowest prescribers or targeting the highest prescribers.  
6  
7  
8  
9

10  
11  
12 The frequency of feedback may also play a role in social norm nudge effects. In the study  
13 described above that informed prescribers they were a ‘top performer’ or ‘not a top  
14 performer’, feedback was provided on a monthly basis, which allowed physicians to assess  
15 the degree to which they had changed their antibiotic prescribing [44]. This is a different  
16 approach to studies that targeted only the high prescribers, i.e. poor performers. These studies  
17 tended to provide the feedback once, informing the physicians that they prescribed at a higher  
18 rate than e.g. 80% of their peers [35, 36, 38, 47, 50]. However, care should be taken when  
19 deciding on the comparison group, as if becoming a ‘top performer’ is perceived as  
20 unattainable, this can be demotivating. This can occur when the comparison norm is  
21 dynamic, i.e. changes according the group’s behaviour, which was the case in all our studies  
22 that provided feedback more than once (Figure 2). For example, if the comparison group is  
23 consistently the top 10%, 90% of people will never reach the target. One study included in  
24 our review reported that the top 10% of prescribers did not change their prescribing  
25 behaviour following the social norm nudge, despite an overall reduction following the  
26 intervention [47]. The authors speculated this may be due to the message not motivating  
27 behaviour change. Furthermore, individuals need to trust the data being presented is an  
28 accurate representation of their performance, and in the case of antibiotic prescribing,  
29 adequately accounts for the clinical features of the populations they treat. Thus, it is crucial  
30 for there to be an understanding of factors that may affect the intervention during intervention  
31 design so as to maximise impact [23].  
32  
33  
34  
35  
36  
37  
38  
39  
40  
41  
42  
43  
44  
45  
46  
47  
48  
49  
50  
51  
52  
53  
54  
55  
56  
57  
58  
59  
60

1  
2  
3 It has been suggested that we can also learn from nudges that fail [14, 54]. There were four  
4 studies that implemented a social norm feedback nudge that had no effect on overall  
5 antibiotic prescribing [39, 40, 45, 51]. All four studies had two intervention features in  
6 common. Firstly, the peer comparison used was the mean prescribing rate of the group or in  
7 the case of one study the interquartile range of the group. For those prescribers that were at  
8 the mean prescribing level or marginally below it, this may not have provided enough  
9 motivation to change their behaviour. Furthermore, as mentioned above, the ‘boomerang  
10 effect’ may occur in individuals performing above average. Secondly, the feedback in the  
11 four evaluations of social norm nudges that did not reduce overall prescribing was not  
12 provided from a high-profile or respected figure, which may have reduced the salience of the  
13 message.  
14  
15  
16  
17  
18  
19  
20  
21  
22  
23  
24  
25  
26  
27  
28  
29  
30

31 The literature on audit and feedback interventions in healthcare provides insights into what  
32 features make these interventions more effective, and complement those from the behavioural  
33 economics and psychology literature [16]. A Cochrane review found that feedback is more  
34 likely to be effective when: baseline performance is low; the source is a supervisor or  
35 colleague; the frequency is more than once; it is delivered both verbally and in written  
36 formats; and when feedback includes both targets and an action plan [15]. Many of these  
37 features were included in the social norm nudges we identified in this review. For example,  
38 most of the social norm nudges included information on appropriate antibiotic prescribing in  
39 primary care. Thus, synthesising such evidence from behavioural economics and psychology  
40 is likely to enhance the effectiveness of these interventions.  
41  
42  
43  
44  
45  
46  
47  
48  
49  
50  
51  
52  
53  
54  
55

56 This systematic review has a number of strengths. Firstly, our search strategy was inclusive  
57 of all studies evaluating interventions to improve antibiotic prescribing in primary care. The  
58  
59  
60

1  
2  
3 selection of studies based on the type of intervention occurred at the full-text screening stage  
4  
5 to ensure that studies not explicitly stating they used nudge techniques were included.  
6

7  
8 Secondly, we used a comprehensive taxonomy of behavioural architecture techniques,[26]  
9  
10 rather than attempting to ascertain whether the underlying cognitive processes addressed by  
11  
12 the intervention had the features of a nudge. However, there are a number of limitations. We  
13  
14 were unable to perform a meta-analysis or summarise the results quantitatively due to the  
15  
16 heterogenous reporting of study outcomes. Furthermore, though we aimed to examine the  
17  
18 features of social norm nudges that may enhance their effectiveness, the variation with which  
19  
20 these nudges were implemented across a small number of studies prevented firm conclusions  
21  
22 being drawn. The need for further research to improve the effectiveness of social norm  
23  
24 nudges, also sometimes called audit and feedback interventions, in healthcare is recognised.  
25  
26 Nonetheless, this review has provided practical insights into the use of nudge interventions to  
27  
28 reduce antibiotic use in primary care, and highlighted areas for further research.  
29  
30  
31  
32  
33  
34

## 35 **CONCLUSIONS**

36  
37 Health systems worldwide continue to struggle to consistently deliver evidence-based care  
38  
39 [55]. Nudges can be used in lieu of, or to augment, more traditional efforts such as education  
40  
41 (targeting clinicians, as well as the public), financial incentives, promotion of guidelines, and  
42  
43 changing models of care. Evaluation of nudges applied in healthcare will play a key role in  
44  
45 identifying interventions suitable for use in different contexts, including primary care, and in  
46  
47 further developing applications of nudge strategies to improve the delivery of effective  
48  
49 healthcare services.  
50  
51  
52  
53  
54

## 55 **FUNDING**

56  
57  
58  
59  
60

1  
2  
3 This study was funded by a National Health and Medical Research Council (NHMRC)  
4  
5 Partnership Project (2006957). MZR is supported by a NHMRC Early Career Fellowship  
6  
7 (APP1143941). JIW is supported by a NHMRC Elizabeth Blackburn Leadership Investigator  
8  
9 Grant (APP1174021). The funding body had no role in the design of the study, data  
10  
11 collection , analysis, interpretation or writing of the manuscript.  
12  
13  
14  
15  
16

### 17 **COMPETING INTERESTS**

18  
19 The authors declare that they have no competing interests.  
20  
21  
22  
23  
24  
25

### 26 **AUTHOR CONTRIBUTIONS**

27  
28 MZR conceived the study with JW and BN. MZR and GG designed the search strategy and  
29  
30 GG ran the searches. MZR, GG and AN screened articles for inclusion with input from BN.  
31  
32 MZR, GG and AN conducted data extraction and quality assessments. LL and KS provided  
33  
34 support for the compilation of results. MZR compiled results and wrote the initial manuscript  
35  
36 draft. All authors contributed to the editorial process of the manuscript and approved the final  
37  
38 manuscript.  
39  
40  
41  
42  
43

### 44 **DATA SHARING STATEMENT**

45  
46 All data is available in the manuscript or Supplementary files.  
47  
48  
49  
50

### 51 **ETHICS APPROVAL**

52  
53 This study does not involve human participants.  
54  
55  
56  
57

58 **WORD COUNT:** 4821  
59  
60

## REFERENCES

1. Jee, Y., et al., *Antimicrobial resistance: a threat to global health*. Lancet Infect Dis, 2018. **18**(9): p. 939-940.
2. Van Boeckel, T.P., et al., *Global antibiotic consumption 2000 to 2010: an analysis of national pharmaceutical sales data*. Lancet Infect Dis, 2014. **14**(8): p. 742-750.
3. World Health Organization, *Model List of Essential Medicines, 21st List*. 2019, WHO: Geneva.
4. Klein, E.Y., et al., *Assessment of WHO antibiotic consumption and access targets in 76 countries, 2000-15: an analysis of pharmaceutical sales data*. Lancet Infect Dis, 2020. **21**(1): p. 107-115.
5. Arnolda, G., et al., *Assessing the appropriateness of paediatric antibiotic overuse in Australian children: a population-based sample survey*. BMC Pediatr, 2020. **20**(1): p. 185.
6. Pouwels, K.B., et al., *Actual versus 'ideal' antibiotic prescribing for common conditions in English primary care*. J Antimicrob Chemother, 2018. **73**(suppl\_2): p. 19-26.
7. Hay, A.D., *Antibiotic prescribing in primary care*. BMJ, 2019. **364**: p. 1780.
8. Leis, J.A., et al., *Using antibiotics wisely for respiratory tract infection in the era of covid-19*. BMJ, 2020. **371**: p. m4125.
9. Lemiengre, M., et al., *Antibiotics for sinus infection of short duration in adults*. Cochrane Database of Systematic Reviews, 2018(9).
10. Köchling, A., et al., *Reduction of antibiotic prescriptions for acute respiratory tract infections in primary care: a systematic review*. Implement Sci, 2018. **13**(1): p. 47.



- 1  
2  
3 11. Tonkin-Crine, S., et al., *Clinician-targeted interventions to influence antibiotic*  
4 *prescribing behaviour for acute respiratory infections in primary care: an overview*  
5 *of systematic reviews*. Cochrane Database Syst Rev, 2017. **9**(9): p. CD012252.  
6  
7
- 8  
9  
10 12. Vodicka, T.A., et al., *Reducing antibiotic prescribing for children with respiratory*  
11 *tract infections in primary care: a systematic review*. Br J Gen Pract, 2013. **63**(612):  
12  
13 p. e445-54.  
14
- 15  
16 13. Michie, S., M.M. van Stralen, and R. West, *The behaviour change wheel: a new*  
17 *method for characterising and designing behaviour change interventions*. Implement  
18  
19 Sci, 2011. **6**: p. 42.  
20  
21
- 22  
23 14. Osman, M., et al., *Learning from behavioural changes that fail*. Trends in Cognitive  
24  
25 Sciences, 2020. **24**(12): p. 969-980.  
26  
27
- 28  
29 15. Ivers, N., et al., *Audit and feedback: effects on professional practice and healthcare*  
30 *outcomes*. Cochrane Database of Systematic Reviews, 2012(6).  
31  
32
- 33  
34 16. Ivers, N.M., et al., *No more 'business as usual' with audit and feedback interventions:*  
35 *towards an agenda for a reinvigorated intervention*. Implement Sci, 2014. **9**: p. 14.  
36  
37
- 38  
39 17. Schultz, P.W., et al., *The constructive, destructive, and reconstructive power of social*  
40 *norms*. Psychol Sci, 2007. **18**(5): p. 429-34.  
41  
42
- 43  
44 18. Hummel, D. and A. Maedche, *How effective is nudging? A quantitative review on the*  
45 *effect sizes and limits of empirical nudging studies*. J Behav Exp Econ, 2019. **80**: p.  
46  
47 47-58.  
48
- 49  
50 19. Adam, A. and J. Jensen, *What is the effectiveness of obesity related interventions at*  
51 *retail grocery stores and supermarkets? a systematic review*. BMC Public Health,  
52  
53 2016. **16**(1): p. 1247.  
54  
55
- 56  
57 20. Bucher, T., et al., *Nudging consumers towards healthier choices: a systematic review*  
58 *of positional influences on food choice*. Br J Nutr, 2016. **115**(12): p. 2252-2263.  
59  
60

- 1  
2  
3 21. Yoong, S.L., et al., *Nudge strategies to improve healthcare providers' implementation*  
4  
5  
6  
7  
8  
9  
10  
11  
12  
13  
14  
15  
16  
17  
18  
19  
20  
21  
22  
23  
24  
25  
26  
27  
28  
29  
30  
31  
32  
33  
34  
35  
36  
37  
38  
39  
40  
41  
42  
43  
44  
45  
46  
47  
48  
49  
50  
51  
52  
53  
54  
55  
56  
57  
58  
59  
60  
22. Fox, C.R., et al., *Details matter: predicting when nudging clinicians will succeed or*  
*fail*. *Bmj*, 2020. **370**: p. m3256.
23. de Ridder, D., F. Kroese, and L. van Gestel, *Nudgeability: Mapping Conditions of*  
*Susceptibility to Nudge Influence*. *Perspect Psychol Sci*, 2022. **17**(2): p. 346-359.
24. Moher, D., et al., *Preferred Reporting Items for Systematic Reviews and Meta-*  
*Analyses: The PRISMA Statement*. *PLoS Med*, 2009. **6**(7): p. e1000097.
25. Thaler, R. and C. Sunstein, *Nudge: Improving decisions about health, wealth, and*  
*happiness*. 2009, US: Penguin Putnam Inc.
26. Münscher, R., M. Vetter, and T. Scheuerle, *A Review and Taxonomy of Choice*  
*Architecture Techniques*. *J Behav Decis Mak*, 2016. **29**(5): p. 511-524.
27. Hagemeyer, A., C. Samel, and M. Hellmich, *The regression discontinuity design:*  
*Methods and implementation with a worked example in health services research*. *Z*  
*Evid Fortbild Qual Gesundheitswes*, 2022.
28. Tang, Y. and T.D. Cook, *Statistical Power for the Comparative Regression*  
*Discontinuity Design With a Pretest No-Treatment Control Function: Theory and*  
*Evidence From the National Head Start Impact Study*. *Eval Rev*, 2018. **42**(1): p. 71-  
110.
29. Colquhoun, H.L., et al., *Informing the research agenda for optimizing audit and*  
*feedback interventions: results of a prioritization exercise*. *BMC Med Res Methodol*,  
2021. **21**(1): p. 20.
30. Cochrane Effective Practice and Organisation of Care, *EPOC resources for review*  
*authors: Suggested risk of bias criteria for EPOC reviews*. 2017.

- 1  
2  
3 31. Raban, M.Z., et al., *Effectiveness of interventions targeting antibiotic use in long-term*  
4 *aged care facilities: a systematic review and meta-analysis*. BMJ Open, 2020. **10**(1):  
5 p. e028494.  
6  
7  
8  
9  
10 32. Higgins, J., et al., *Cochrane Handbook for Systematic Reviews of Interventions*  
11 *version 6.2 (updated February 2021)*. 2021, Cochrane.  
12  
13  
14 33. Ogilvie, D., et al., *The harvest plot: a method for synthesising evidence about the*  
15 *differential effects of interventions*. BMC Med Res Methodol, 2008. **8**: p. 8.  
16  
17  
18 34. Awad, A., I. Eltayeb, and O. Baraka, *Changing antibiotics prescribing practices in*  
19 *health centers of Khartoum State, Sudan*. Eur J Clin Pharmacol, 2006. **62**(2): p. 135-  
20 42.  
21  
22  
23 35. Behavioural Economics Team of the Australian Government (BETA), *Nudge vs*  
24 *Superbugs: A behavioural economics trial to reduce the overprescribing of*  
25 *antibiotics*. 2018, Department of the Prime Minister and Cabinet: Canberra.  
26  
27  
28 36. Bradley, D., et al., *Social norm feedback reduces primary care antibiotic prescribing*  
29 *in a regression discontinuity study*. J Antimicrob Chemother, 2019. **74**: p. 2797–2802.  
30  
31  
32 37. Gerber, J., et al., *Effect of an outpatient antimicrobial stewardship intervention on*  
33 *broad-spectrum antibiotic prescribing by primary care pediatricians*. JAMA, 2013.  
34 **309**.  
35  
36  
37 38. Hallsworth, M., et al., *Provision of social norm feedback to high prescribers of*  
38 *antibiotics in general practice: a pragmatic national randomised controlled trial*.  
39 Lancet, 2016. **387**(10029): p. 1743-52.  
40  
41  
42 39. Hemkens, L., et al., *Personalized prescription feedback using routinely collected data*  
43 *to reduce antibiotic use in primary care*. JAMA, 2017. **177**(2): p. 176-183.  
44  
45  
46  
47  
48  
49  
50  
51  
52  
53  
54  
55  
56  
57  
58  
59  
60

- 1  
2  
3  
4  
5  
6  
7  
8  
9  
10  
11  
12  
13  
14  
15  
16  
17  
18  
19  
20  
21  
22  
23  
24  
25  
26  
27  
28  
29  
30  
31  
32  
33  
34  
35  
36  
37  
38  
39  
40  
41  
42  
43  
44  
45  
46  
47  
48  
49  
50  
51  
52  
53  
54  
55  
56  
57  
58  
59  
60
40. Hurlimann, D., et al., *Improvement of antibiotic prescription in outpatient care: a cluster-randomized intervention study using a sentinel surveillance network of physicians*. J Antimicrob Chemother, 2015. **70**: p. 602-608.
  41. Lagerløv, P., et al., *Improving doctors' prescribing behaviour through reflection on guidelines and prescription feedback: a randomised controlled study*. Qual Health Care, 2000. **9**(159-165).
  42. Mainous, A., et al., *An evaluation of statewide strategies to reduce antibiotic overuse* Fam Med, 2000. **32**(1): p. 22-9.
  43. Meeker, D., et al., *Nudging guideline-concordant antibiotic prescribing: a randomized clinical trial*. JAMA Intern Med, 2014. **174**(3): p. 425-31.
  44. Meeker, D., et al., *Effect of Behavioral Interventions on Inappropriate Antibiotic Prescribing Among Primary Care Practices: A Randomized Clinical Trial*. JAMA, 2016. **315**(6): p. 562-70.
  45. O'Connell, D., D. Henry, and R. Tomlins, *Randomised controlled trial of effect of feedback on general practitioners' prescribing in Australia*. BMJ, 1999. **318**.
  46. Persell, S., et al., *Behavioral interventions to reduce inappropriate antibiotic prescribing: a randomized pilot trial*. BMC Infect Dis, 2016. **16**: p. 373.
  47. Ratajczak, M., et al., *The effectiveness of repeating a social norm feedback intervention to high prescribers of antibiotics in general practice: a national regression discontinuity design*. J Antimicrob Chemother, 2019. **74**: p. 3603–3610.
  48. Søndergaard, J., et al., *Mailed prescriber feedback in addition to a clinical guideline has no impact: a randomised, controlled trial*. Scand J Prim Health Care, 2003. **21**: p. 47-51.

- 1  
2  
3  
4  
5  
6  
7  
8  
9  
10  
11  
12  
13  
14  
15  
16  
17  
18  
19  
20  
21  
22  
23  
24  
25  
26  
27  
28  
29  
30  
31  
32  
33  
34  
35  
36  
37  
38  
39  
40  
41  
42  
43  
44  
45  
46  
47  
48  
49  
50  
51  
52  
53  
54  
55  
56  
57  
58  
59  
60
49. Yang, L., et al., *Public reporting improves antibiotic prescribing for upper respiratory tract infections in primary care: a matched-pair cluster-randomized trial in China*. Health Res Policy Syst, 2014. **12**(61).
  50. Behavioural Economics Team of the Australian Government (BETA), *Nudge vs Superbugs: 12 months on*. 2020, Department of the Prime Minister and Cabinet: Canberra.
  51. Curtis, H., et al., *Evaluating the impact of a very low-cost intervention to increase practices' engagement with data and change prescribing behaviour: a randomized trial in English primary care*. Fam Pract, 2021.
  52. Kronman, M.P., et al., *Reducing Antibiotic Prescribing in Primary Care for Respiratory Illness*. Pediatrics, 2020. **146**(3).
  53. Last, B.S., et al., *Systematic review of clinician-directed nudges in healthcare contexts*. BMJ Open, 2021. **11**(7): p. e048801.
  54. Sunstein, C., *Nudges that fail*. Behavioural Public Policy, 2017. **1**(1): p. 4-25.
  55. Braithwaite, J., P. Glasziou, and J. Westbrook, *The three numbers you need to know about healthcare: the 60-30-10 Challenge*. BMC Med, 2020. **18**(1): p. 102.

## FIGURE LEGENDS

### Figure 1: PRISMA flow chart of search and screening results

\*One study had two publications.

### Figure 2: Implementation features of social norm feedback nudge interventions

**Figure 3: Harvest plot of effects of nudge interventions targeting antibiotic prescribing in primary care on overall antibiotic prescribing.** Each mark or column represents one nudge intervention. Column height represents the risk of bias in the study: tallest columns are studies with low risk of bias; medium columns are moderate risk of bias; short columns are high risk of bias.

1  
2  
3 **Figure 4: Harvest plot of effects of social norm feedback nudge interventions on overall**  
4 **antibiotic prescribing by implementation features.** Each mark or column represents one  
5 nudge intervention. Column height represents the risk of bias of the study: tallest columns  
6 are studies with low risk of bias; medium columns are moderate risk of bias; short columns  
7 are high risk of bias.  
8  
9  
10  
11  
12  
13  
14  
15  
16  
17  
18  
19  
20  
21  
22  
23  
24  
25  
26  
27  
28  
29  
30  
31  
32  
33  
34  
35  
36  
37  
38  
39  
40  
41  
42  
43  
44  
45  
46  
47  
48  
49  
50  
51  
52  
53  
54  
55  
56  
57  
58  
59  
60

For peer review only

## TABLES

Table 2: Characteristics of studies evaluating nudge interventions to improve antibiotic prescribing in primary care

| Author, Year      | Country          | Sample size     | Infections targeted | Nudge intervention/s | Outcomes of interest                                                                                    | Overall risk of bias <sup>a</sup> |
|-------------------|------------------|-----------------|---------------------|----------------------|---------------------------------------------------------------------------------------------------------|-----------------------------------|
| Awad, 2006        | Sudan            | 20 practices    | All                 | Social norm feedback | No. of consultations with AB;<br>No. of consultations with an inappropriate AB <sup>b</sup>             | High                              |
| BETA, 2018 & 2020 | Australia        | 6608 physicians | All                 | Social norm feedback | No. of ABs per 1000 consultations                                                                       | Moderate                          |
| Bradley, 2019     | Northern Ireland | 331 practices   | All                 | Social norm feedback | No. of ABs per 1000 registered population                                                               | Moderate                          |
| Chang, 2020       | China            | 163 physicians  | All                 | Social norm feedback | No. of AB prescriptions per 100 prescriptions                                                           | Moderate                          |
| Curtis, 2021      | England          | 1401 practices  | All                 | Social norm feedback | % broad spectrum AB of all AB                                                                           | Low                               |
| Gerber, 2013      | USA              | 162 physicians  | RTI                 | Social norm feedback | % broad spectrum ABs among children with AB prescription;<br>ABs for viral RTI                          | High                              |
| Hallsworth, 2016  | England          | 1581 practices  | All                 | Social norm feedback | No. of ABs per 1000 registered population                                                               | Low                               |
| Hemkens, 2017     | Switzerland      | 2900 physicians | All                 | Social norm feedback | Antibiotic DDD per 1000 consultations                                                                   | Low                               |
| Hurlimann, 2016   | Switzerland      | 136 practices   | RTI; UTI            | Social norm feedback | % AB prescriptions for upper RTIs;<br>% penicillins for RTI;<br>% trimethoprim/sulfamethoxazole for UTI | Moderate                          |
| Kronman, 2020     | US               | 57 physicians   | RTI                 | Social norm feedback | % of RTI with AB prescribed                                                                             | Low                               |
| Lagerlov, 2000    | Norway           | 199 physicians  | UTI                 | Social norm feedback | % inappropriate ABs for UTI                                                                             | High                              |
| Mainous, 2000     | USA              | 216 physicians  | RTI                 | Social norm feedback | % inappropriate AB treatments                                                                           | Low                               |

|                   |           |                              |     |                                                                         |                                                                      |          |
|-------------------|-----------|------------------------------|-----|-------------------------------------------------------------------------|----------------------------------------------------------------------|----------|
| Meeker, 2014      | USA       | 14 physicians                | RTI | Public commitment                                                       | No. of ABs per 100 AB inappropriate RTIs                             | Moderate |
| Meeker, 2016      | USA       | 244 physicians               | RTI | Social norm feedback, accountable justification, suggested alternatives | No. of ABs per 100 AB inappropriate RTIs                             | Moderate |
| O'Connell, 1999   | Australia | 2440 physicians              | All | Social norm feedback                                                    | No. of ABs per 100 consultations                                     | Moderate |
| Persell, 2016     | USA       | 28 physicians                | RTI | Social norm feedback, accountable justification, suggested alternatives | No. of ABs per 100 RTIs;<br>No. of ABs per 100 AB inappropriate RTIs | High     |
| Ratajczak, 2019   | England   | 6995 practices               | All | Social norm feedback                                                    | No. of ABs per 1000 registered population                            | Moderate |
| Sondergaard, 2003 | Denmark   | 299 physicians               | RTI | Social norm feedback                                                    | No. of ABs per 1000 registered population                            | Moderate |
| Yang, 2014        | China     | 20 practices (54 physicians) | RTI | Public reporting                                                        | % of RTI consultations with AB;<br>% of RTI consultations with >1 AB | Low      |

RTI is respiratory tract infections; UTI is urinary tract infections. AB is antibiotic. No. is number. DDD is defined daily doses.

<sup>a</sup>Risk of bias assessed using the Cochrane Effective Practice and Organisation of Care group's tool for studies with a control group. Overall rating assigned 'low' when all criteria were 'low' risk; 'medium' when 1-2 criteria were scored 'unclear' or 'high' risk; and 'high' when >2 criteria were scored 'unclear' or 'high' risk.

<sup>b</sup>Inappropriate with respect to antibiotic, doses and/or duration.



1  
2  
3  
4  
5  
6  
7  
8  
9  
10  
11  
12  
13  
14  
15  
16  
17  
18  
19  
20  
21  
22  
23  
24  
25  
26  
27  
28  
29  
30  
31  
32  
33  
34  
35  
36  
37  
38  
39  
40  
41  
42  
43  
44  
45  
46

For peer review only

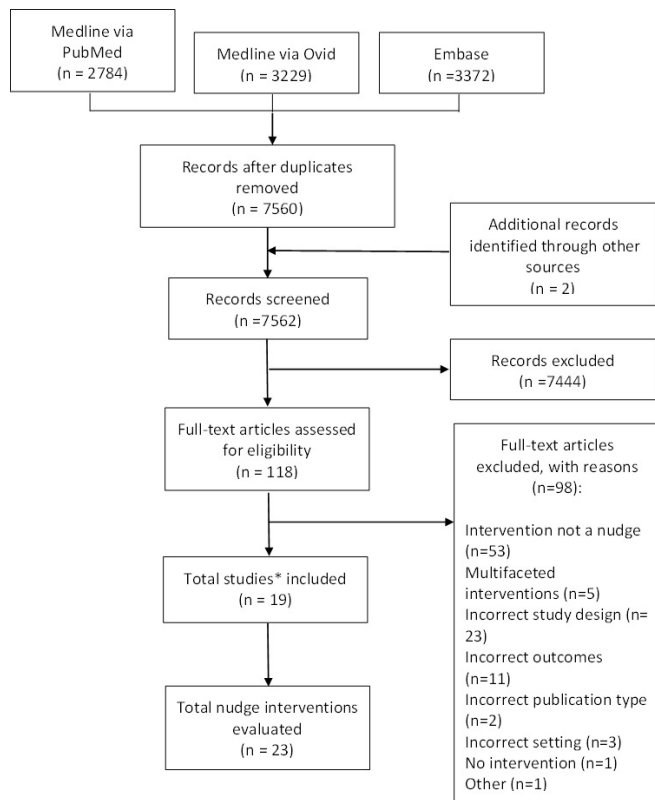

Figure 1: PRISMA flow chart of search and screening results

\*One study had two publications.

243x193mm (120 x 120 DPI)

|                                      | Targeting high prescribers or all prescribers? |        | Prescribing compared to which peers? |                |                     | Injunctive or descriptive norm | Targeting high prescribers or comparison to top performers/rank or injunctive norm |             | Relative or absolute performance to peers |         | Based on individual physician or practice data? |          | Frequency of feedback | Static vs dynamic norms |           | Private vs public reporting |      | All or diagnosis-specific antibiotics |         |         | Mode of feedback |        | Graphic display of prescribing? |               | Supporting information provided in intervention group |            |         |         |       |     |
|--------------------------------------|------------------------------------------------|--------|--------------------------------------|----------------|---------------------|--------------------------------|------------------------------------------------------------------------------------|-------------|-------------------------------------------|---------|-------------------------------------------------|----------|-----------------------|-------------------------|-----------|-----------------------------|------|---------------------------------------|---------|---------|------------------|--------|---------------------------------|---------------|-------------------------------------------------------|------------|---------|---------|-------|-----|
|                                      | All                                            | High   | Average/median                       | Top performers | Rank with all peers |                                | Injunctive                                                                         | Descriptive | Yes                                       | No      | Absolute                                        | Relative |                       | Both                    | Physician | Practice                    | Once | >1                                    | Static  | Dynamic | Private          | Public | All                             | Inappropriate | Letter                                                | Electronic | Meeting | Yes     | No    | Yes |
| <b>Studies reporting a reduction</b> |                                                |        |                                      |                |                     |                                |                                                                                    |             |                                           |         |                                                 |          |                       |                         |           |                             |      |                                       |         |         |                  |        |                                 |               |                                                       |            |         |         |       |     |
| Awad, 2006                           | •                                              | •      | •                                    | •              | •                   | •                              | •                                                                                  | •           | •                                         | •       | •                                               | •        | •                     | •                       | •         | •                           | •    | •                                     | •       | •       | •                | •      | •                               | •             | •                                                     | •          | •       | •       | •     | •   |
| BETA, 2018 & 2020                    | •                                              | •      | •                                    | •              | •                   | •                              | •                                                                                  | •           | •                                         | •       | •                                               | •        | •                     | •                       | •         | •                           | •    | •                                     | •       | •       | •                | •      | •                               | •             | •                                                     | •          | •       | •       | •     | •   |
| Bradley, 2019                        | •                                              | •      | •                                    | •              | •                   | •                              | •                                                                                  | •           | •                                         | •       | •                                               | •        | •                     | •                       | •         | •                           | •    | •                                     | •       | •       | •                | •      | •                               | •             | •                                                     | •          | •       | •       | •     | •   |
| Chang, 2020                          | •                                              | •      | •                                    | •              | •                   | •                              | •                                                                                  | •           | •                                         | •       | •                                               | •        | •                     | •                       | •         | •                           | •    | •                                     | •       | •       | •                | •      | •                               | •             | •                                                     | •          | •       | •       | •     | •   |
| Gerber, 2013                         | •                                              | •      | •                                    | •              | •                   | •                              | •                                                                                  | •           | •                                         | •       | •                                               | •        | •                     | •                       | •         | •                           | •    | •                                     | •       | •       | •                | •      | •                               | •             | •                                                     | •          | •       | •       | •     | •   |
| Hallsworth, 2016                     | •                                              | •      | •                                    | •              | •                   | •                              | •                                                                                  | •           | •                                         | •       | •                                               | •        | •                     | •                       | •         | •                           | •    | •                                     | •       | •       | •                | •      | •                               | •             | •                                                     | •          | •       | •       | •     | •   |
| Kronman, 2020                        | •                                              | •      | •                                    | •              | •                   | •                              | •                                                                                  | •           | •                                         | •       | •                                               | •        | •                     | •                       | •         | •                           | •    | •                                     | •       | •       | •                | •      | •                               | •             | •                                                     | •          | •       | •       | •     | •   |
| Lagerlof, 2000                       | •                                              | •      | •                                    | •              | •                   | •                              | •                                                                                  | •           | •                                         | •       | •                                               | •        | •                     | •                       | •         | •                           | •    | •                                     | •       | •       | •                | •      | •                               | •             | •                                                     | •          | •       | •       | •     | •   |
| Maimous, 2000                        | •                                              | •      | •                                    | •              | •                   | •                              | •                                                                                  | •           | •                                         | •       | •                                               | •        | •                     | •                       | •         | •                           | •    | •                                     | •       | •       | •                | •      | •                               | •             | •                                                     | •          | •       | •       | •     | •   |
| Meeskes, 2016                        | •                                              | •      | •                                    | •              | •                   | •                              | •                                                                                  | •           | •                                         | •       | •                                               | •        | •                     | •                       | •         | •                           | •    | •                                     | •       | •       | •                | •      | •                               | •             | •                                                     | •          | •       | •       | •     | •   |
| Persell, 2016                        | •                                              | •      | •                                    | •              | •                   | •                              | •                                                                                  | •           | •                                         | •       | •                                               | •        | •                     | •                       | •         | •                           | •    | •                                     | •       | •       | •                | •      | •                               | •             | •                                                     | •          | •       | •       | •     | •   |
| Ratajczak, 2019                      | •                                              | •      | •                                    | •              | •                   | •                              | •                                                                                  | •           | •                                         | •       | •                                               | •        | •                     | •                       | •         | •                           | •    | •                                     | •       | •       | •                | •      | •                               | •             | •                                                     | •          | •       | •       | •     | •   |
| Sondergaard, 2003                    | •                                              | •      | •                                    | •              | •                   | •                              | •                                                                                  | •           | •                                         | •       | •                                               | •        | •                     | •                       | •         | •                           | •    | •                                     | •       | •       | •                | •      | •                               | •             | •                                                     | •          | •       | •       | •     | •   |
| Total number of studies (%)          | 9 (64)                                         | 5 (36) | 8 (62)                               | 3 (23)         | 2 (15)              | 4 (31)                         | 9 (69)                                                                             | 10 (77)     | 3 (23)                                    | 8 (62)  | 4 (31)                                          | 1 (8)    | 10 (77)               | 3 (23)                  | 5 (38)    | 8 (62)                      | 0    | 6 (100)                               | 12 (92) | 1 (8)   | 7 (58)           | 5 (42) | 7 (58)                          | 4 (33)        | 1 (8)                                                 | 4 (36)     | 7 (64)  | 12 (92) | 1 (8) |     |
| <b>Studies reporting no change</b>   |                                                |        |                                      |                |                     |                                |                                                                                    |             |                                           |         |                                                 |          |                       |                         |           |                             |      |                                       |         |         |                  |        |                                 |               |                                                       |            |         |         |       |     |
| Curtis, 2021                         | •                                              | •      | •                                    | •              | •                   | •                              | •                                                                                  | •           | •                                         | •       | •                                               | •        | •                     | •                       | •         | •                           | •    | •                                     | •       | •       | •                | •      | •                               | •             | •                                                     | •          | •       | •       | •     | •   |
| Hemkens, 2017                        | •                                              | •      | •                                    | •              | •                   | •                              | •                                                                                  | •           | •                                         | •       | •                                               | •        | •                     | •                       | •         | •                           | •    | •                                     | •       | •       | •                | •      | •                               | •             | •                                                     | •          | •       | •       | •     | •   |
| Hurlimann, 2016                      | •                                              | •      | •                                    | •              | •                   | •                              | •                                                                                  | •           | •                                         | •       | •                                               | •        | •                     | •                       | •         | •                           | •    | •                                     | •       | •       | •                | •      | •                               | •             | •                                                     | •          | •       | •       | •     | •   |
| O'Connell, 1999                      | •                                              | •      | •                                    | •              | •                   | •                              | •                                                                                  | •           | •                                         | •       | •                                               | •        | •                     | •                       | •         | •                           | •    | •                                     | •       | •       | •                | •      | •                               | •             | •                                                     | •          | •       | •       | •     | •   |
| Total number of studies (%)          | 2 (50)                                         | 2 (50) | 4 (100)                              | 0              | 0                   | 0                              | 4 (100)                                                                            | 2 (50)      | 2 (50)                                    | 4 (100) | 0                                               | 0        | 2 (50)                | 2 (50)                  | 0         | 4 (100)                     | 0    | 3 (100)                               | 4 (100) | 0       | 4 (100)          | 0      | 4 (100)                         | 0             | 0                                                     | 3 (75)     | 1 (25)  | 4 (100) | 0     |     |

na is not applicable. ■ indicates the feature was present in the study  
a All antibiotics for respiratory tract infection  
b Individual performance discussed within the group of physicians  
c Interquartile range for all other physicians

Figure 2: Implementation features of social norm feedback nudge interventions

869x610mm (47 x 47 DPI)

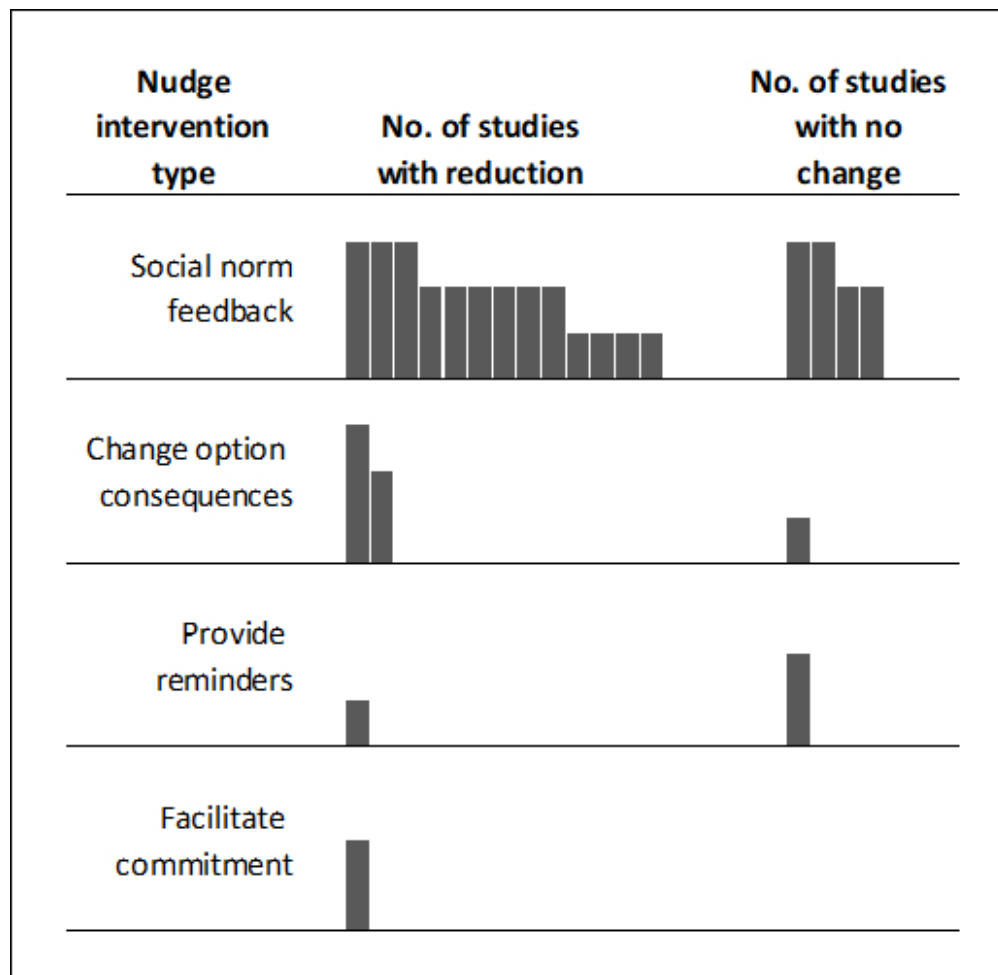

Figure 3: Harvest plot of effects of nudge interventions targeting antibiotic prescribing in primary care on overall antibiotic prescribing.

Each mark or column represents one nudge intervention. Column height represents the risk of bias in the study: tallest columns are studies with low risk of bias; medium columns are moderate risk of bias; short columns are high risk of bias.

278x270mm (47 x 47 DPI)

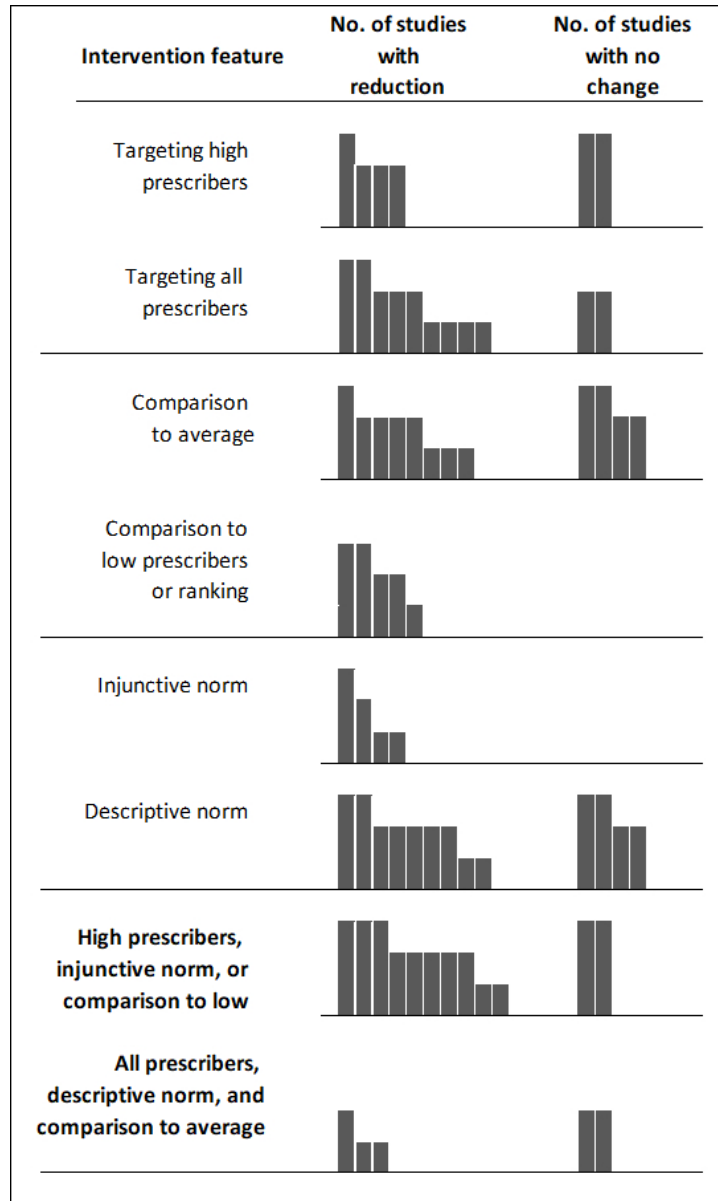

Figure 4: Harvest plot of effects of social norm feedback nudge interventions on overall antibiotic prescribing by implementation features.

Each mark or column represents one nudge intervention. Column height represents the risk of bias of the study: tallest columns are studies with low risk of bias; medium columns are moderate risk of bias; short columns are high risk of bias.

295x489mm (47 x 47 DPI)

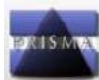

## PRISMA 2020 for Abstracts Checklist

| Section and Topic       | Item # | Checklist item                                                                                                                                                                                                                                                                                        | Reported (Yes/No) |
|-------------------------|--------|-------------------------------------------------------------------------------------------------------------------------------------------------------------------------------------------------------------------------------------------------------------------------------------------------------|-------------------|
| <b>TITLE</b>            |        |                                                                                                                                                                                                                                                                                                       |                   |
| Title                   | 1      | Identify the report as a systematic review.                                                                                                                                                                                                                                                           | Yes               |
| <b>BACKGROUND</b>       |        |                                                                                                                                                                                                                                                                                                       |                   |
| Objectives              | 2      | Provide an explicit statement of the main objective(s) or question(s) the review addresses.                                                                                                                                                                                                           | Yes               |
| <b>METHODS</b>          |        |                                                                                                                                                                                                                                                                                                       |                   |
| Eligibility criteria    | 3      | Specify the inclusion and exclusion criteria for the review.                                                                                                                                                                                                                                          | Yes               |
| Information sources     | 4      | Specify the information sources (e.g. databases, registers) used to identify studies and the date when each was last searched.                                                                                                                                                                        | Yes               |
| Risk of bias            | 5      | Specify the methods used to assess risk of bias in the included studies.                                                                                                                                                                                                                              | Yes               |
| Synthesis of results    | 6      | Specify the methods used to present and synthesise results.                                                                                                                                                                                                                                           | Yes               |
| <b>RESULTS</b>          |        |                                                                                                                                                                                                                                                                                                       |                   |
| Included studies        | 7      | Give the total number of included studies and participants and summarise relevant characteristics of studies.                                                                                                                                                                                         | Yes               |
| Synthesis of results    | 8      | Present results for main outcomes, preferably indicating the number of included studies and participants for each. If meta-analysis was done, report the summary estimate and confidence/credible interval. If comparing groups, indicate the direction of the effect (i.e. which group is favoured). | Yes               |
| <b>DISCUSSION</b>       |        |                                                                                                                                                                                                                                                                                                       |                   |
| Limitations of evidence | 9      | Provide a brief summary of the limitations of the evidence included in the review (e.g. study risk of bias, inconsistency and imprecision).                                                                                                                                                           | Yes               |
| Interpretation          | 10     | Provide a general interpretation of the results and important implications.                                                                                                                                                                                                                           | Yes               |
| <b>OTHER</b>            |        |                                                                                                                                                                                                                                                                                                       |                   |
| Funding                 | 11     | Specify the primary source of funding for the review.                                                                                                                                                                                                                                                 | In main text      |
| Registration            | 12     | Provide the register name and registration number.                                                                                                                                                                                                                                                    | N/A               |

From: Page MJ, McKenzie JE, Bossuyt PM, Boutron I, Hoffmann TC, Mulrow CD, et al. The PRISMA 2020 statement: an updated guideline for reporting systematic reviews. *BMJ* 2021;372:n71. doi: 10.1136/bmj.n71

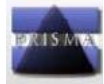

## PRISMA 2020 Checklist

| Section and Topic             | Item # | Checklist item                                                                                                                                                                                                                                                                                       | Location where item is reported |
|-------------------------------|--------|------------------------------------------------------------------------------------------------------------------------------------------------------------------------------------------------------------------------------------------------------------------------------------------------------|---------------------------------|
| <b>TITLE</b>                  |        |                                                                                                                                                                                                                                                                                                      |                                 |
| Title                         | 1      | Identify the report as a systematic review.                                                                                                                                                                                                                                                          | 1                               |
| <b>ABSTRACT</b>               |        |                                                                                                                                                                                                                                                                                                      |                                 |
| Abstract                      | 2      | See the PRISMA 2020 for Abstracts checklist.                                                                                                                                                                                                                                                         | See previous page               |
| <b>INTRODUCTION</b>           |        |                                                                                                                                                                                                                                                                                                      |                                 |
| Rationale                     | 3      | Describe the rationale for the review in the context of existing knowledge.                                                                                                                                                                                                                          | 5                               |
| Objectives                    | 4      | Provide an explicit statement of the objective(s) or question(s) the review addresses.                                                                                                                                                                                                               | 6                               |
| <b>METHODS</b>                |        |                                                                                                                                                                                                                                                                                                      |                                 |
| Eligibility criteria          | 5      | Specify the inclusion and exclusion criteria for the review and how studies were grouped for the syntheses.                                                                                                                                                                                          | 7                               |
| Information sources           | 6      | Specify all databases, registers, websites, organisations, reference lists and other sources searched or consulted to identify studies. Specify the date when each source was last searched or consulted.                                                                                            | 6                               |
| Search strategy               | 7      | Present the full search strategies for all databases, registers and websites, including any filters and limits used.                                                                                                                                                                                 | 6                               |
| Selection process             | 8      | Specify the methods used to decide whether a study met the inclusion criteria of the review, including how many reviewers screened each record and each report retrieved, whether they worked independently, and if applicable, details of automation tools used in the process.                     | 8                               |
| Data collection process       | 9      | Specify the methods used to collect data from reports, including how many reviewers collected data from each report, whether they worked independently, any processes for obtaining or confirming data from study investigators, and if applicable, details of automation tools used in the process. | 8                               |
| Data items                    | 10a    | List and define all outcomes for which data were sought. Specify whether all results that were compatible with each outcome domain in each study were sought (e.g. for all measures, time points, analyses), and if not, the methods used to decide which results to collect.                        | 8                               |
|                               | 10b    | List and define all other variables for which data were sought (e.g. participant and intervention characteristics, funding sources). Describe any assumptions made about any missing or unclear information.                                                                                         | 9                               |
| Study risk of bias assessment | 11     | Specify the methods used to assess risk of bias in the included studies, including details of the tool(s) used, how many reviewers assessed each study and whether they worked independently, and if applicable, details of automation tools used in the process.                                    | 10                              |
| Effect measures               | 12     | Specify for each outcome the effect measure(s) (e.g. risk ratio, mean difference) used in the synthesis or presentation of results.                                                                                                                                                                  | 11                              |
| Synthesis methods             | 13a    | Describe the processes used to decide which studies were eligible for each synthesis (e.g. tabulating the study intervention characteristics and comparing against the planned groups for each synthesis (item #5)).                                                                                 | 11-12                           |
|                               | 13b    | Describe any methods required to prepare the data for presentation or synthesis, such as handling of missing summary statistics, or data conversions.                                                                                                                                                | 11                              |
|                               | 13c    | Describe any methods used to tabulate or visually display results of individual studies and syntheses.                                                                                                                                                                                               | 12                              |
|                               | 13d    | Describe any methods used to synthesize results and provide a rationale for the choice(s). If meta-analysis was performed, describe the model(s), method(s) to identify the presence and extent of statistical heterogeneity, and software package(s) used.                                          | 12                              |
|                               | 13e    | Describe any methods used to explore possible causes of heterogeneity among study results (e.g. subgroup analysis, meta-regression).                                                                                                                                                                 | 12                              |
|                               | 13f    | Describe any sensitivity analyses conducted to assess robustness of the synthesized results.                                                                                                                                                                                                         | 12                              |
| Reporting bias assessment     | 14     | Describe any methods used to assess risk of bias due to missing results in a synthesis (arising from reporting biases).                                                                                                                                                                              | 10                              |
| Certainty                     | 15     | Describe any methods used to assess certainty (or confidence) in the body of evidence for an outcome.                                                                                                                                                                                                | N/A                             |



# PRISMA 2020 Checklist

| Section and Topic                              | Item # | Checklist item                                                                                                                                                                                                                                                                       | Location where item is reported |
|------------------------------------------------|--------|--------------------------------------------------------------------------------------------------------------------------------------------------------------------------------------------------------------------------------------------------------------------------------------|---------------------------------|
| assessment                                     |        |                                                                                                                                                                                                                                                                                      |                                 |
| <b>RESULTS</b>                                 |        |                                                                                                                                                                                                                                                                                      |                                 |
| Study selection                                | 16a    | Describe the results of the search and selection process, from the number of records identified in the search to the number of studies included in the review, ideally using a flow diagram.                                                                                         | 12                              |
|                                                | 16b    | Cite studies that might appear to meet the inclusion criteria, but which were excluded, and explain why they were excluded.                                                                                                                                                          | 12                              |
| Study characteristics                          | 17     | Cite each included study and present its characteristics.                                                                                                                                                                                                                            | 12                              |
| Risk of bias in studies                        | 18     | Present assessments of risk of bias for each included study.                                                                                                                                                                                                                         | 13                              |
| Results of individual studies                  | 19     | For all outcomes, present, for each study: (a) summary statistics for each group (where appropriate) and (b) an effect estimate and its precision (e.g. confidence/credible interval), ideally using structured tables or plots.                                                     | Supplementary file 4            |
| Results of syntheses                           | 20a    | For each synthesis, briefly summarise the characteristics and risk of bias among contributing studies.                                                                                                                                                                               | Table 2                         |
|                                                | 20b    | Present results of all statistical syntheses conducted. If meta-analysis was done, present for each the summary estimate and its precision (e.g. confidence/credible interval) and measures of statistical heterogeneity. If comparing groups, describe the direction of the effect. | 13-18                           |
|                                                | 20c    | Present results of all investigations of possible causes of heterogeneity among study results.                                                                                                                                                                                       | N/A                             |
|                                                | 20d    | Present results of all sensitivity analyses conducted to assess the robustness of the synthesized results.                                                                                                                                                                           | 13-18                           |
| Reporting biases                               | 21     | Present assessments of risk of bias due to missing results (arising from reporting biases) for each synthesis assessed.                                                                                                                                                              | N/A                             |
| Certainty of evidence                          | 22     | Present assessments of certainty (or confidence) in the body of evidence for each outcome assessed.                                                                                                                                                                                  | N/A                             |
| <b>DISCUSSION</b>                              |        |                                                                                                                                                                                                                                                                                      |                                 |
| Discussion                                     | 23a    | Provide a general interpretation of the results in the context of other evidence.                                                                                                                                                                                                    | 19-22                           |
|                                                | 23b    | Discuss any limitations of the evidence included in the review.                                                                                                                                                                                                                      | 23                              |
|                                                | 23c    | Discuss any limitations of the review processes used.                                                                                                                                                                                                                                | 23                              |
|                                                | 23d    | Discuss implications of the results for practice, policy, and future research.                                                                                                                                                                                                       | 22                              |
| <b>OTHER INFORMATION</b>                       |        |                                                                                                                                                                                                                                                                                      |                                 |
| Registration and protocol                      | 24a    | Provide registration information for the review, including register name and registration number, or state that the review was not registered.                                                                                                                                       | Not registered                  |
|                                                | 24b    | Indicate where the review protocol can be accessed, or state that a protocol was not prepared.                                                                                                                                                                                       | N/A                             |
|                                                | 24c    | Describe and explain any amendments to information provided at registration or in the protocol.                                                                                                                                                                                      | N/A                             |
| Support                                        | 25     | Describe sources of financial or non-financial support for the review, and the role of the funders or sponsors in the review.                                                                                                                                                        | 24                              |
| Competing interests                            | 26     | Declare any competing interests of review authors.                                                                                                                                                                                                                                   | 24                              |
| Availability of data, code and other materials | 27     | Report which of the following are publicly available and where they can be found: template data collection forms; data extracted from included studies; data used for all analyses; analytic code; any other materials used in the review.                                           | Supplementary files             |



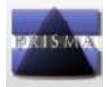

## PRISMA 2020 Checklist

For more information, visit: <http://www.prisma-statement.org/>

For peer review only

- 1
- 2
- 3
- 4
- 5
- 6
- 7
- 8
- 9
- 10
- 11
- 12
- 13
- 14
- 15
- 16
- 17
- 18
- 19
- 20
- 21
- 22
- 23
- 24
- 25
- 26
- 27
- 28
- 29
- 30
- 31
- 32
- 33
- 34
- 35
- 36
- 37
- 38
- 39
- 40
- 41
- 42
- 43
- 44
- 45
- 46
- 47

Raban et al. Nudge interventions to reduce unnecessary antibiotic prescribing in primary care: a systematic review

## SEARCH STRATEGY

### MEDLINE (via Ovid and PubMed)

Date searched: 23 April 2021

| Search ID# | Search Terms                                                                                                                                                                                                                       |
|------------|------------------------------------------------------------------------------------------------------------------------------------------------------------------------------------------------------------------------------------|
| 1          | exp Ambulatory Care/                                                                                                                                                                                                               |
| 2          | exp Community Medicine/                                                                                                                                                                                                            |
| 3          | exp General Practice/                                                                                                                                                                                                              |
| 4          | exp General Practitioners/                                                                                                                                                                                                         |
| 5          | exp Primary Health Care/                                                                                                                                                                                                           |
| 6          | exp Physicians, Family/                                                                                                                                                                                                            |
| 7          | exp Physicians, Primary Care/                                                                                                                                                                                                      |
| 8          | "general practice".ti,ab.                                                                                                                                                                                                          |
| 9          | "general practitioner*".ti,ab.                                                                                                                                                                                                     |
| 10         | "family physician*".ti,ab.                                                                                                                                                                                                         |
| 11         | "family practice".ti,ab.                                                                                                                                                                                                           |
| 12         | "primary care".ti,ab.                                                                                                                                                                                                              |
| 13         | "primary health care".ti,ab.                                                                                                                                                                                                       |
| 14         | "primary healthcare".ti,ab.                                                                                                                                                                                                        |
| 15         | exp *anti-bacterial agents/tu or exp *anti-infective agents, urinary/tu                                                                                                                                                            |
| 16         | antibiot*.ti,ab.                                                                                                                                                                                                                   |
| 17         | anti-biot*.ti,ab.                                                                                                                                                                                                                  |
| 18         | anti-microb*.ti,ab.                                                                                                                                                                                                                |
| 19         | antimicrob*.ti,ab.                                                                                                                                                                                                                 |
| 20         | anti-infective*.ti,ab.                                                                                                                                                                                                             |
| 21         | antiinfective*.ti,ab.                                                                                                                                                                                                              |
| 22         | anti-bacterial*.ti,ab.                                                                                                                                                                                                             |
| 23         | antibacterial*.ti,ab.                                                                                                                                                                                                              |
| 24         | randomized controlled trial.pt                                                                                                                                                                                                     |
| 25         | controlled clinical trial.pt                                                                                                                                                                                                       |
| 26         | pragmatic clinical trial.pt                                                                                                                                                                                                        |
| 27         | multicenter study.pt                                                                                                                                                                                                               |
| 28         | exp non-randomized controlled trials as topic/                                                                                                                                                                                     |
| 29         | exp controlled before-after studies/                                                                                                                                                                                               |
| 30         | (randomis* or randomiz* or randomly).ti,ab.                                                                                                                                                                                        |
| 31         | groups.ab.                                                                                                                                                                                                                         |
| 32         | (trial or multicenter or multi center or multicentre or multi centre).ti.                                                                                                                                                          |
| 33         | (intervention? or effect? or impact? or controlled or control group? or (before adj5 after) or (pre adj5 post) or ((pretest or pre test) and (posttest or post test)) or quasiexperiment* or quasi experiment* or evaluat*).ti,ab. |
| 35         | or/1-14                                                                                                                                                                                                                            |
| 36         | or/15-23                                                                                                                                                                                                                           |
| 37         | or/24-34                                                                                                                                                                                                                           |

Raban et al. Nudge interventions to reduce unnecessary antibiotic prescribing in primary care: a systematic review

|    |                                |
|----|--------------------------------|
| 38 | 35 and 36 and 37               |
| 39 | limit 38 to yr="1997 -Current" |
| 40 | limit 39 to english language   |
| 41 | limit 40 to journal article    |
| 42 | limit 41 to humans             |

**Embase (via Ovid)**

Date searched: 23 April 2021

| Search ID# | Search Terms                                                                                                                                                                                                                       |
|------------|------------------------------------------------------------------------------------------------------------------------------------------------------------------------------------------------------------------------------------|
| 1          | exp Ambulatory Care/                                                                                                                                                                                                               |
| 2          | exp Community Medicine/                                                                                                                                                                                                            |
| 3          | exp General Practice/                                                                                                                                                                                                              |
| 4          | exp General Practitioners/                                                                                                                                                                                                         |
| 5          | exp Primary Health Care/                                                                                                                                                                                                           |
| 6          | exp Family Medicine/                                                                                                                                                                                                               |
| 7          | exp Primary Medical Care/                                                                                                                                                                                                          |
| 8          | "general practice".ti,ab.                                                                                                                                                                                                          |
| 9          | "general practitioner*".ti,ab.                                                                                                                                                                                                     |
| 10         | "family physician*".ti,ab.                                                                                                                                                                                                         |
| 11         | "family practice".ti,ab.                                                                                                                                                                                                           |
| 12         | "primary care".ti,ab.                                                                                                                                                                                                              |
| 13         | "primary health care".ti,ab.                                                                                                                                                                                                       |
| 14         | "primary healthcare".ti,ab.                                                                                                                                                                                                        |
| 15         | exp *anti-infective agents/                                                                                                                                                                                                        |
| 16         | exp *anti-infective therapy/ or exp *antimicrobial therapy/                                                                                                                                                                        |
| 17         | exp *antibiotic agent/                                                                                                                                                                                                             |
| 18         | antibiot*.ti,ab.                                                                                                                                                                                                                   |
| 19         | anti-biot*.ti,ab.                                                                                                                                                                                                                  |
| 20         | anti-microb*.ti,ab.                                                                                                                                                                                                                |
| 21         | antimicrob*.ti,ab.                                                                                                                                                                                                                 |
| 22         | anti-infective*.ti,ab.                                                                                                                                                                                                             |
| 23         | antiinfective*.ti,ab.                                                                                                                                                                                                              |
| 24         | anti-bacterial*.ti,ab.                                                                                                                                                                                                             |
| 25         | antibacterial*.ti,ab.                                                                                                                                                                                                              |
| 26         | exp "controlled clinical trial (topic)"/                                                                                                                                                                                           |
| 27         | exp epidemiology/                                                                                                                                                                                                                  |
| 28         | (randomis* or randomiz* or randomly).ti,ab.                                                                                                                                                                                        |
| 29         | groups.ab.                                                                                                                                                                                                                         |
| 30         | (trial or multicenter or multi center or multicentre or multi centre).ti.                                                                                                                                                          |
| 31         | (intervention? or effect? or impact? or controlled or control group? or (before adj5 after) or (pre adj5 post) or ((pretest or pre test) and (posttest or post test)) or quasiexperiment* or quasi experiment* or evaluat*).ti,ab. |
| 32         | or/1-14                                                                                                                                                                                                                            |

Raban et al. Nudge interventions to reduce unnecessary antibiotic prescribing in primary care: a systematic review

|    |                                                                                                                |
|----|----------------------------------------------------------------------------------------------------------------|
| 33 | or/15-25                                                                                                       |
| 34 | or/26-31                                                                                                       |
| 35 | 32 and 33 and 34                                                                                               |
| 36 | limit 35 to english language                                                                                   |
| 37 | limit 36 to human                                                                                              |
| 38 | limit 37 to yr="1997 -Current"                                                                                 |
| 39 | limit 38 to (conference abstract or "conference review" or editorial or erratum or letter or note or "review") |
| 40 | 38 not 39                                                                                                      |
| 41 | remove duplicates from 40                                                                                      |
| 42 | limit 41 to embase                                                                                             |

### Websites searched

Date searched: 23 April 2021

| Organisation name                                       | URL                                                                                                               |
|---------------------------------------------------------|-------------------------------------------------------------------------------------------------------------------|
| Behavioural Economics Team of the Australian Government | <a href="https://behaviouraleconomics.pmc.gov.au/">https://behaviouraleconomics.pmc.gov.au/</a>                   |
| Behavioural Insights Team                               | <a href="https://www.bi.team">https://www.bi.team</a>                                                             |
| Danish Nudging Network                                  | <a href="https://www.danishnudgingnetwork.dk/">https://www.danishnudgingnetwork.dk/</a>                           |
| iNudgeyou                                               | <a href="https://inudgeyou.com/en/">https://inudgeyou.com/en/</a>                                                 |
| Nudge France                                            | <a href="http://www.nudgefrance.org/">http://www.nudgefrance.org/</a>                                             |
| Nudge-it                                                | <a href="https://www.nudge-it.eu/">https://www.nudge-it.eu/</a>                                                   |
| Nudge Italia                                            | <a href="http://www.nudgeitalia.it/">http://www.nudgeitalia.it/</a>                                               |
| Norwegian Nudging Network                               | <a href="https://sites.google.com/view/norsk nudgenet/home">https://sites.google.com/view/norsk nudgenet/home</a> |
| Penn Medicine Nudge Unit                                | <a href="https://nudgeunit.upenn.edu">https://nudgeunit.upenn.edu</a>                                             |
| The European Nudging Network                            | <a href="http://tenudge.eu/">http://tenudge.eu/</a>                                                               |
| The Swedish Nudging Network                             | <a href="https://theswedishnudgingnetwork.com/">https://theswedishnudgingnetwork.com/</a>                         |

Raban et al. Nudge interventions to reduce unnecessary antibiotic prescribing in primary care: a systematic review

### SUPPLEMENTARY FILE 3

Table S3: Assessment of risk of bias\* against each criterion for individual studies

| Study                                    | Random sequence generation | Allocation concealment | Baseline outcome measurements similar | Baseline characteristics similar | Incomplete outcome data | Blinding of outcome measurement assessment | Protections against contamination | Selective reporting | Other bias | TOTAL number of criteria with low risk of bias |
|------------------------------------------|----------------------------|------------------------|---------------------------------------|----------------------------------|-------------------------|--------------------------------------------|-----------------------------------|---------------------|------------|------------------------------------------------|
| Awad, 2006                               | ✓                          | ?                      | ✓                                     | ?                                | ?                       | ?                                          | ✓                                 | X                   | ✓          | 4/9                                            |
| BETA, 2018 & 2020                        | ✓                          | ✓                      | ✓                                     | ✓                                | ?                       | ✓                                          | ✓                                 | ✓                   | ✓          | 8/9                                            |
| Bradley, 2019                            | X                          | X                      | ✓                                     | ✓                                | ✓                       | ✓                                          | ✓                                 | ✓                   | ✓          | 7/9                                            |
| Chang, 2020                              | ✓                          | X                      | ✓                                     | ✓                                | ✓                       | ✓                                          | ✓                                 | ✓                   | ✓          | 8/9                                            |
| Curtis, 2021                             | ✓                          | ✓                      | ✓                                     | ✓                                | ✓                       | ✓                                          | ✓                                 | ✓                   | ✓          | 9/9                                            |
| Gerber, 2013                             | ✓                          | ✓                      | ✓                                     | ✓                                | ?                       | X                                          | ?                                 | ✓                   | ✓          | 6/9                                            |
| Hallsworth, 2016                         | ✓                          | ✓                      | ✓                                     | ✓                                | ✓                       | ✓                                          | ✓                                 | ✓                   | ✓          | 9/9                                            |
| Hemkens, 2017                            | ✓                          | ✓                      | ✓                                     | ✓                                | ✓                       | ✓                                          | ✓                                 | ✓                   | ✓          | 9/9                                            |
| Hurlimann, 2016                          | ✓                          | ✓                      | ✓                                     | ✓                                | ✓                       | X                                          | ✓                                 | ✓                   | ✓          | 8/9                                            |
| Kronman, 2020                            | ✓                          | ✓                      | ✓                                     | ✓                                | ✓                       | ✓                                          | ✓                                 | ✓                   | ✓          | 9/9                                            |
| Lagerlov, 2000                           | ✓                          | ✓                      | ✓                                     | ✓                                | X                       | ?                                          | ✓                                 | ?                   | X          | 6/9                                            |
| Mainous, 2000                            | ✓                          | ✓                      | ✓                                     | ✓                                | ✓                       | ✓                                          | ✓                                 | ✓                   | ✓          | 9/9                                            |
| Meeker, 2014                             | ✓                          | ✓                      | ✓                                     | ✓                                | ✓                       | ✓                                          | ?                                 | ✓                   | ✓          | 8/9                                            |
| Meeker, 2016                             | ✓                          | ✓                      | ?                                     | ?                                | ✓                       | ✓                                          | ✓                                 | ✓                   | X          | 6/9                                            |
| O'Connell, 1999                          | ?                          | ✓                      | ✓                                     | ✓                                | ✓                       | ✓                                          | ✓                                 | ✓                   | ✓          | 8/9                                            |
| Persell, 2016                            | ✓                          | ✓                      | ✓                                     | ?                                | ✓                       | ✓                                          | ?                                 | ✓                   | X          | 7/9                                            |
| Ratajczak, 2019                          | X                          | X                      | ✓                                     | ✓                                | ✓                       | ✓                                          | ✓                                 | ✓                   | ✓          | 7/9                                            |
| Sondergaard, 2003                        | ?                          | ✓                      | ✓                                     | ✓                                | ✓                       | ✓                                          | ✓                                 | ✓                   | ✓          | 8/9                                            |
| Yang, 2014                               | ✓                          | ✓                      | ✓                                     | ✓                                | ✓                       | ✓                                          | ✓                                 | ✓                   | ✓          | 9/9                                            |
| Number of studies with high risk of bias | 2                          | 3                      | 0                                     | 0                                | 1                       | 2                                          | 0                                 | 1                   | 3          |                                                |
| Number of studies with unclear bias      | 2                          | 1                      | 1                                     | 3                                | 3                       | 2                                          | 3                                 | 1                   | 0          |                                                |
| Number of studies with                   | 15                         | 15                     | 15                                    | 16                               | 15                      | 15                                         | 16                                | 17                  | 16         |                                                |

Raban et al. Nudge interventions to reduce unnecessary antibiotic prescribing in primary care: a systematic review

|                  |  |  |  |  |  |  |  |  |  |  |  |
|------------------|--|--|--|--|--|--|--|--|--|--|--|
| low risk of bias |  |  |  |  |  |  |  |  |  |  |  |
|------------------|--|--|--|--|--|--|--|--|--|--|--|

'X' denotes high risk of bias for this criterion; '?' denotes unclear risk of bias; '✓' denotes low risk of bias.

\*Risk of bias assessed using the Cochrane Effective Practice and Organisation of Care group's tool ([https://epoc.cochrane.org/sites/epoc.cochrane.org/files/public/uploads/Resources-for-authors2017/suggested\\_risk\\_of\\_bias\\_criteria\\_for\\_epoc\\_reviews.pdf](https://epoc.cochrane.org/sites/epoc.cochrane.org/files/public/uploads/Resources-for-authors2017/suggested_risk_of_bias_criteria_for_epoc_reviews.pdf))

For peer review only

1  
2  
3  
4  
5  
6  
7  
8  
9  
10  
11  
12  
13  
14  
15  
16  
17  
18  
19  
20  
21  
22  
23  
24  
25  
26  
27  
28  
29  
30  
31  
32  
33  
34  
35  
36  
37  
38  
39  
40  
41  
42  
43  
44  
45  
46  
47  
48  
49  
50  
51  
52  
53  
54  
55  
56  
57  
58  
59  
60

**SUPPLEMENTARY FILE 4**

Table S4: Effects of nudge interventions to improve antibiotic use in primary care

| Study                                                        | Design                   | Interventions                                | Control    | Outcome/s                                                  | Follow-up period   | Reported statistics                                                                       | 95% CI, p-value                                                          | Vote counting assessment |
|--------------------------------------------------------------|--------------------------|----------------------------------------------|------------|------------------------------------------------------------|--------------------|-------------------------------------------------------------------------------------------|--------------------------------------------------------------------------|--------------------------|
| <b>Decision information – provide social reference point</b> |                          |                                              |            |                                                            |                    |                                                                                           |                                                                          |                          |
| Awad, 2006                                                   | Cluster randomised trial | Social norm feedback                         | Usual care | No. of consultations with AB prescribed                    | 3-months post      | Mean difference: -2.8                                                                     | (-1.1, -4.6), p=0.004                                                    | Reduction                |
|                                                              |                          |                                              |            | No. of consultations with an inappropriate AB <sup>a</sup> | 3-months post      | Mean difference: -1.9                                                                     | (-0.1, -3.7), p=0.040                                                    | n/a                      |
| BETA, 2018 & 2020                                            | Cluster randomised trial | Social norm feedback with graph              | Usual care | No. of ABs per 1000 consultations                          | 6 & 12months post  | Mean difference (6-months): -13.6 (~12% reduction)<br>(12-months): -9.3 (~9.4% reduction) | 6-months: (-16.6, -10.6), p<0.00001<br>12-months: (-12.3, -6.2); p<0.001 | Reduction                |
|                                                              |                          | Social norm feedback with education material | Usual care | No. of ABs per 1000 consultations                          | 6 & 12-months post | Mean difference (6-months): -10.3 (~9.3% reduction)<br>(12-months):                       | 6-months: (-13.8, -6.8), p<0.001<br>12-months: (-11, -5.6); p<0.001      | n/a                      |

## Raban et al. Nudge interventions to reduce unnecessary antibiotic prescribing in primary care: a systematic review

|               |                                               |                                               |            |                                                 |                                               |                                                                                                 |                                                                           |           |
|---------------|-----------------------------------------------|-----------------------------------------------|------------|-------------------------------------------------|-----------------------------------------------|-------------------------------------------------------------------------------------------------|---------------------------------------------------------------------------|-----------|
|               |                                               |                                               |            |                                                 |                                               | -8.3 (~8.4% reduction)                                                                          |                                                                           |           |
|               |                                               | Social norm feedback with delayed prescribing | Usual      | No. ABs per 1000 consultation                   | 6 & 12-months post                            | Mean difference (6-months): -11.8 (~10.7% reduction)<br><br>(12-months): -8.8 (~8.9% reduction) | 6 months: (-14.7, -8.9); p<0.001<br><br>12-months: (-11.6, -6.0); p<0.001 | n/a       |
| Bradley, 2019 | Regression discontinuity study                | Social norm feedback                          | Usual care | No. of ABs per 1000 registered population       | 3-months post                                 | Mean difference: -25.7                                                                          | (-42.5, -8.8), p=0.0028                                                   | Reduction |
|               |                                               |                                               |            |                                                 | 12-months post                                | Mean difference: -58.7 (~5% reduction)                                                          | (-116.7, -0.7), p=0.047                                                   | n/a       |
| Chang, 2020   | Cluster randomised crossover-controlled trial | Social norm feedback                          | Usual care | No. of AB prescriptions per total prescriptions | 3-month intervention period                   | Relative reduction in intervention arm: 35.2%; in control arm: 30.8%                            | p<0.001                                                                   | Reduction |
|               |                                               |                                               |            |                                                 | 3-month intervention period (after crossover) | Relative reduction in intervention arm: 14.2%; in control arm: 4.6%                             | p<0.001                                                                   | n/a       |



## Raban et al. Nudge interventions to reduce unnecessary antibiotic prescribing in primary care: a systematic review

|    |                  |                          |                                  |            |                                                                   |                                   |                                           |                          |           |
|----|------------------|--------------------------|----------------------------------|------------|-------------------------------------------------------------------|-----------------------------------|-------------------------------------------|--------------------------|-----------|
| 1  |                  |                          |                                  |            |                                                                   |                                   |                                           |                          |           |
| 2  |                  |                          |                                  |            |                                                                   |                                   |                                           |                          |           |
| 3  |                  |                          |                                  |            |                                                                   |                                   |                                           |                          |           |
| 4  | Curtis, 2021     | Randomised trial         | Social norm feedback (standard)  | Usual care | AB prescriptions per 1000 population                              | 6-months post                     | No change                                 | NS                       | No change |
| 5  |                  |                          |                                  |            |                                                                   |                                   |                                           |                          |           |
| 6  |                  |                          |                                  |            |                                                                   |                                   |                                           |                          |           |
| 7  |                  |                          |                                  |            |                                                                   |                                   |                                           |                          |           |
| 8  |                  |                          |                                  |            | Proportion of antibiotics which were broad spectrum               | 6-months post                     | 2.1% reduction compared to controls       | p=0.104                  | n/a       |
| 9  |                  |                          |                                  |            |                                                                   |                                   |                                           |                          |           |
| 10 |                  |                          |                                  |            |                                                                   |                                   |                                           |                          |           |
| 11 |                  |                          |                                  |            |                                                                   |                                   |                                           |                          |           |
| 12 |                  |                          | Social norm feedback (optimised) | Usual care | AB prescriptions per 1000 population                              | 6-months post                     | No change                                 | NS                       | No change |
| 13 |                  |                          |                                  |            |                                                                   |                                   |                                           |                          |           |
| 14 |                  |                          |                                  |            |                                                                   |                                   |                                           |                          |           |
| 15 |                  |                          |                                  |            |                                                                   |                                   |                                           |                          |           |
| 16 |                  |                          |                                  |            |                                                                   |                                   |                                           |                          |           |
| 17 |                  |                          |                                  |            | Proportion of antibiotics which were broad spectrum               | 6-months post                     | 2.1% reduction compared to controls       | P=0.046                  | n/a       |
| 18 |                  |                          |                                  |            |                                                                   |                                   |                                           |                          |           |
| 19 |                  |                          |                                  |            |                                                                   |                                   |                                           |                          |           |
| 20 | Gerber, 2013     | Cluster randomised trial | Social norm feedback             | Usual care | ABs for viral RTI                                                 | 12-month intervention period      | DID: -1.7%                                | NR, p=0.93               | Reduction |
| 21 |                  |                          |                                  |            |                                                                   |                                   |                                           |                          |           |
| 22 |                  |                          |                                  |            |                                                                   |                                   |                                           |                          |           |
| 23 |                  |                          |                                  |            | Percent of broad spectrum ABs among children with AB prescription | 12-month intervention period      | DID: -6.7%                                | NR, p=0.01               | n/a       |
| 24 |                  |                          |                                  |            |                                                                   |                                   |                                           |                          |           |
| 25 |                  |                          |                                  |            |                                                                   |                                   |                                           |                          |           |
| 26 | Hallsworth, 2016 | Randomised trial         | Social norm feedback             | Usual care | No. of ABs per 1000 registered population                         | 6-months post                     | IRR: 0.967 <sup>b</sup> (~3.3% reduction) | (0.957, 0.977), p<0.0001 | Reduction |
| 27 |                  |                          |                                  |            |                                                                   |                                   |                                           |                          |           |
| 28 |                  |                          |                                  |            |                                                                   |                                   |                                           |                          |           |
| 29 |                  |                          |                                  |            |                                                                   |                                   |                                           |                          |           |
| 30 | Hemkens, 2017    | Randomised trial         | Social norm feedback             | Usual care | DDD per 1000 consultations                                        | First 1-year intervention period  | Between group difference: 0.81%           | (-2.56, 4.30), NR        | No change |
| 31 |                  |                          |                                  |            |                                                                   |                                   |                                           |                          |           |
| 32 |                  |                          |                                  |            |                                                                   |                                   |                                           |                          |           |
| 33 |                  |                          |                                  |            |                                                                   |                                   |                                           |                          |           |
| 34 |                  |                          |                                  |            |                                                                   |                                   |                                           |                          |           |
| 35 |                  |                          |                                  |            |                                                                   | Second 1-year intervention period | Between group difference: -1.73%          | (-5.07, 1.72%), p=0.32   |           |
| 36 |                  |                          |                                  |            |                                                                   |                                   |                                           |                          |           |
| 37 |                  |                          |                                  |            |                                                                   |                                   |                                           |                          |           |
| 38 |                  |                          |                                  |            |                                                                   |                                   |                                           |                          |           |
| 39 |                  |                          |                                  |            |                                                                   |                                   |                                           |                          |           |
| 40 |                  |                          |                                  |            |                                                                   |                                   |                                           |                          |           |
| 41 |                  |                          |                                  |            |                                                                   |                                   |                                           |                          |           |
| 42 |                  |                          |                                  |            |                                                                   |                                   |                                           |                          |           |
| 43 |                  |                          |                                  |            |                                                                   |                                   |                                           |                          |           |
| 44 |                  |                          |                                  |            |                                                                   |                                   |                                           |                          |           |
| 45 |                  |                          |                                  |            |                                                                   |                                   |                                           |                          |           |
| 46 |                  |                          |                                  |            |                                                                   |                                   |                                           |                          |           |

## Raban et al. Nudge interventions to reduce unnecessary antibiotic prescribing in primary care: a systematic review

|                 |                                        |                                                      |                                        |                                                     |                              |                                                         |                       |           |
|-----------------|----------------------------------------|------------------------------------------------------|----------------------------------------|-----------------------------------------------------|------------------------------|---------------------------------------------------------|-----------------------|-----------|
| Hurlimann, 2016 | Cluster randomised trial               | Social norm feedback                                 | Usual care                             | Percentage of AB prescriptions for upper RTIs       | 24-month intervention period | Difference in proportion: -1.2                          | (-10.5, -8.2), p=0.66 | No change |
|                 |                                        |                                                      |                                        | Percentage of penicillins for RTI                   | 24-month intervention period | OR: 1.42                                                | (1.08-1.89), p=0.01   | n/a       |
|                 |                                        |                                                      |                                        | Percentage of trimethoprim/sulfamethoxazole for UTI | 24-month intervention period | OR: 2.16                                                | (1.19-3.91), p=0.01   | n/a       |
| Kronman, 2020   | Stepped wedge cluster randomised trial | Social norm feedback                                 | Usual care                             | Percentage of RTI with antibiotic prescription      | 12-months                    | OR: 0.93                                                | (0.90, 0.96), NR      | Reduction |
| Lagerlov, 2000  | Randomised trial                       | Social norm feedback                                 | Intervention for asthma care           | Percentage of inappropriate ABs for UTI             | 12-months post               | Relative decrease: -9.6%                                | NR, p=0.0004          | Reduction |
| Mainous, 2000   | Randomised trial                       | Social norm feedback                                 | Usual care                             | Mean proportion of inappropriate AB treatments      | 5-months post                | NR                                                      | Not significant       | -         |
|                 |                                        | Social norm feedback with patient education material | Usual care                             | Mean proportion of inappropriate AB treatments      | 5-months post                | Dunnett's T: 2.374                                      | NR, p<0.05            | Reduction |
| Meeker, 2016    | Cluster randomised trial               | Social norm feedback                                 | Usual care                             | No. of ABs per 100 AB inappropriate RTIs            | 18-month intervention period | DID: -5.2%                                              | (-6.9, -1.6), p<0.01  | Reduction |
| O'Connell, 1999 | Randomised trial                       | Social norm feedback                                 | Interventions for other medication use | No. of AB prescriptions per 100 consultations       | 4-months post                | Median: no difference between intervention and controls | NR                    | No change |

Raban et al. Nudge interventions to reduce unnecessary antibiotic prescribing in primary care: a systematic review

|                                                        |                                |                           |            |                                                          |                              |                                              |                         |           |
|--------------------------------------------------------|--------------------------------|---------------------------|------------|----------------------------------------------------------|------------------------------|----------------------------------------------|-------------------------|-----------|
| Persell, 2016                                          | Randomised trial               | Social norm feedback      | Usual care | No. of ABs per 100 RTIs                                  | 12-month intervention period | OR: 0.73                                     | (0.53, 0.995), p<0.05   | Reduction |
|                                                        |                                |                           |            | No. of ABs per 100 AB inappropriate RTIs                 | 12-month intervention period | OR: 0.45                                     | (0.18, 1.11), NR        | n/a       |
| Ratajczak, 2019                                        | Regression discontinuity study | Social norm feedback      | Usual care | No. of ABs per 1000 registered population                | 6-months post                | Percent change in intervention group: -3.69% | (-5.10, -2.29), p<0.001 | Reduction |
| Sondergaard, 2003                                      | Randomised trial               | Social norm feedback      | Guidelines | No. of ABs per 1000 registered patients                  | 3-months post                | Mean difference: -0.6                        | (-2.8, 1.6), NR         | Reduction |
|                                                        |                                |                           |            | Percent of prescriptions for narrow-spectrum penicillins | 3-months post                | Mean difference: 0.7                         | (-0.41, 1.7), NR        | n/a       |
| <b>Decision structure – change option consequences</b> |                                |                           |            |                                                          |                              |                                              |                         |           |
| Meeker, 2016                                           | Cluster randomised trial       | Accountable justification | Usual care | No. of ABs per 100 AB inappropriate RTIs                 | 18-month intervention period | DID: -7.0%                                   | (-9.1, -2.9), p<0.001   | Reduction |
| Persell, 2016                                          | Randomised trial               | Accountable justification | Usual care | No. of ABs per 100 RTIs                                  | 12-month intervention period | OR: 1.05                                     | (0.80, 1.39), NR        | No change |
|                                                        |                                |                           |            | No. of ABs per 100 AB inappropriate RTIs                 | 12-month intervention period | OR: 0.98                                     | (0.42, 2.29), NR        | n/a       |
| Yang, 2014                                             | Cluster randomised trial       | Public reporting          | Education  | Percentage of RTI consultations with AB                  | 5-8 months post              | DID: -1.93                                   | (-6.61, 2.75), p=0.419  | Reduction |
|                                                        |                                |                           |            | Percentage of RTI consultations with >1 AB               | 5-8 months post              | DID: -6.97                                   | (-13.94, 0.00), p=0.049 | n/a       |

## Raban et al. Nudge interventions to reduce unnecessary antibiotic prescribing in primary care: a systematic review

| <b>Decision assistance – provide reminders</b>     |                          |                        |            |                                          |                              |             |                        |           |
|----------------------------------------------------|--------------------------|------------------------|------------|------------------------------------------|------------------------------|-------------|------------------------|-----------|
| Meeker, 2016                                       | Cluster randomised trial | Suggested alternatives | Usual care | No. of ABs per 100 AB inappropriate RTIs | 18-month intervention period | DID: -5.0%  | (-7.8, 0.1%), p=0.66   | Reduction |
| Persell, 2016                                      | Randomised trial         | Suggested alternatives | Usual care | No. of ABs per 100 RTIs                  | 12-month intervention period | OR: 0.72    | (0.54, 0.96), p<0.01   | Reduction |
|                                                    |                          |                        |            | No. of ABs per 100 AB inappropriate RTIs | 12-month intervention period | OR: 0.68    | (0.29, 1.58), NR       | n/a       |
| <b>Decision assistance – facilitate commitment</b> |                          |                        |            |                                          |                              |             |                        |           |
| Meeker, 2014                                       | Randomised trial         | Public commitment      |            | No. of ABs per 100 AB inappropriate RTIs | 12-week intervention period  | DID: -19.7% | (-5.8, -33.04), p=0.02 | Reduction |

No. is 'number'. AB is 'antibiotic'. CI is 'confidence interval'. IRR is 'incidence rate ratio'. DDD is 'defined daily doses'. OR is odds ratio. RTI is 'respiratory tract infection'. UTI is 'urinary tract infection'. DID is 'difference in differences analysis'. NR is not reported. NS is 'not significant'.

\*The intervention promise was assessed based on all antibiotic outcomes reported in each study.

<sup>a</sup>Inappropriate with respect to antibiotic, doses and/or duration.
