# Supplementary material for: Nudge interventions to reduce unnecessary antibiotic prescribing in primary care: a systematic review
Source: PubMed Central journal article supplement — BMJ Open. 2023 Jan 18;13(1):e062688. doi: 10.1136/bmjopen-2022-062688 (PMC9853249; doi:10.1136/bmjopen-2022-062688), 2023-01-18
Supplement: bmjopen-2022-062688supp002.pdf [file bmjopen-2022-062688supp002.pdf]

Raban et al. Nudge interventions to reduce unnecessary antibiotic prescribing in primary care: a systematic review

## SEARCH STRATEGY

### MEDLINE (via Ovid and PubMed)

Date searched: 23 April 2021

| Search ID# | Search Terms                                                                                                                                                                                                                       |
|------------|------------------------------------------------------------------------------------------------------------------------------------------------------------------------------------------------------------------------------------|
| 1          | exp Ambulatory Care/                                                                                                                                                                                                               |
| 2          | exp Community Medicine/                                                                                                                                                                                                            |
| 3          | exp General Practice/                                                                                                                                                                                                              |
| 4          | exp General Practitioners/                                                                                                                                                                                                         |
| 5          | exp Primary Health Care/                                                                                                                                                                                                           |
| 6          | exp Physicians, Family/                                                                                                                                                                                                            |
| 7          | exp Physicians, Primary Care/                                                                                                                                                                                                      |
| 8          | "general practice".ti,ab.                                                                                                                                                                                                          |
| 9          | "general practitioner*".ti,ab.                                                                                                                                                                                                     |
| 10         | "family physician*".ti,ab.                                                                                                                                                                                                         |
| 11         | "family practice".ti,ab.                                                                                                                                                                                                           |
| 12         | "primary care".ti,ab.                                                                                                                                                                                                              |
| 13         | "primary health care".ti,ab.                                                                                                                                                                                                       |
| 14         | "primary healthcare".ti,ab.                                                                                                                                                                                                        |
| 15         | exp *anti-bacterial agents/tu or exp *anti-infective agents, urinary/tu                                                                                                                                                            |
| 16         | antibiot*.ti,ab.                                                                                                                                                                                                                   |
| 17         | anti-biot*.ti,ab.                                                                                                                                                                                                                  |
| 18         | anti-microb*.ti,ab.                                                                                                                                                                                                                |
| 19         | antimicrob*.ti,ab.                                                                                                                                                                                                                 |
| 20         | anti-infective*.ti,ab.                                                                                                                                                                                                             |
| 21         | antiinfective*.ti,ab.                                                                                                                                                                                                              |
| 22         | anti-bacterial*.ti,ab.                                                                                                                                                                                                             |
| 23         | antibacterial*.ti,ab.                                                                                                                                                                                                              |
| 24         | randomized controlled trial.pt                                                                                                                                                                                                     |
| 25         | controlled clinical trial.pt                                                                                                                                                                                                       |
| 26         | pragmatic clinical trial.pt                                                                                                                                                                                                        |
| 27         | multicenter study.pt                                                                                                                                                                                                               |
| 28         | exp non-randomized controlled trials as topic/                                                                                                                                                                                     |
| 29         | exp controlled before-after studies/                                                                                                                                                                                               |
| 30         | (randomis* or randomiz* or randomly).ti,ab.                                                                                                                                                                                        |
| 31         | groups.ab.                                                                                                                                                                                                                         |
| 32         | (trial or multicenter or multi center or multicentre or multi centre).ti.                                                                                                                                                          |
| 33         | (intervention? or effect? or impact? or controlled or control group? or (before adj5 after) or (pre adj5 post) or ((pretest or pre test) and (posttest or post test)) or quasiexperiment* or quasi experiment* or evaluat*).ti,ab. |
| 35         | or/1-14                                                                                                                                                                                                                            |
| 36         | or/15-23                                                                                                                                                                                                                           |
| 37         | or/24-34                                                                                                                                                                                                                           |

Raban et al. Nudge interventions to reduce unnecessary antibiotic prescribing in primary care: a systematic review

|    |                                |
|----|--------------------------------|
| 38 | 35 and 36 and 37               |
| 39 | limit 38 to yr="1997 -Current" |
| 40 | limit 39 to english language   |
| 41 | limit 40 to journal article    |
| 42 | limit 41 to humans             |

Embase (via Ovid)

Date searched: 23 April 2021

| Search ID# | Search Terms                                                                                                                                                                                                                       |
|------------|------------------------------------------------------------------------------------------------------------------------------------------------------------------------------------------------------------------------------------|
| 1          | exp Ambulatory Care/                                                                                                                                                                                                               |
| 2          | exp Community Medicine/                                                                                                                                                                                                            |
| 3          | exp General Practice/                                                                                                                                                                                                              |
| 4          | exp General Practitioners/                                                                                                                                                                                                         |
| 5          | exp Primary Health Care/                                                                                                                                                                                                           |
| 6          | exp Family Medicine/                                                                                                                                                                                                               |
| 7          | exp Primary Medical Care/                                                                                                                                                                                                          |
| 8          | "general practice".ti,ab.                                                                                                                                                                                                          |
| 9          | "general practitioner*".ti,ab.                                                                                                                                                                                                     |
| 10         | "family physician*".ti,ab.                                                                                                                                                                                                         |
| 11         | "family practice".ti,ab.                                                                                                                                                                                                           |
| 12         | "primary care".ti,ab.                                                                                                                                                                                                              |
| 13         | "primary health care".ti,ab.                                                                                                                                                                                                       |
| 14         | "primary healthcare".ti,ab.                                                                                                                                                                                                        |
| 15         | exp *anti-infective agents/                                                                                                                                                                                                        |
| 16         | exp *anti-infective therapy/ or exp *antimicrobial therapy/                                                                                                                                                                        |
| 17         | exp *antibiotic agent/                                                                                                                                                                                                             |
| 18         | antibiot*.ti,ab.                                                                                                                                                                                                                   |
| 19         | anti-biot*.ti,ab.                                                                                                                                                                                                                  |
| 20         | anti-microb*.ti,ab.                                                                                                                                                                                                                |
| 21         | antimicrob*.ti,ab.                                                                                                                                                                                                                 |
| 22         | anti-infective*.ti,ab.                                                                                                                                                                                                             |
| 23         | antiinfective*.ti,ab.                                                                                                                                                                                                              |
| 24         | anti-bacterial*.ti,ab.                                                                                                                                                                                                             |
| 25         | antibacterial*.ti,ab.                                                                                                                                                                                                              |
| 26         | exp "controlled clinical trial (topic)"/                                                                                                                                                                                           |
| 27         | exp epidemiology/                                                                                                                                                                                                                  |
| 28         | (randomis* or randomiz* or randomly).ti,ab.                                                                                                                                                                                        |
| 29         | groups.ab.                                                                                                                                                                                                                         |
| 30         | (trial or multicenter or multi center or multicentre or multi centre).ti.                                                                                                                                                          |
| 31         | (intervention? or effect? or impact? or controlled or control group? or (before adj5 after) or (pre adj5 post) or ((pretest or pre test) and (posttest or post test)) or quasiexperiment* or quasi experiment* or evaluat*).ti,ab. |
| 32         | or/1-14                                                                                                                                                                                                                            |

Raban et al. Nudge interventions to reduce unnecessary antibiotic prescribing in primary care: a systematic review

|    |                                                                                                                |
|----|----------------------------------------------------------------------------------------------------------------|
| 33 | or/15-25                                                                                                       |
| 34 | or/26-31                                                                                                       |
| 35 | 32 and 33 and 34                                                                                               |
| 36 | limit 35 to english language                                                                                   |
| 37 | limit 36 to human                                                                                              |
| 38 | limit 37 to yr="1997 -Current"                                                                                 |
| 39 | limit 38 to (conference abstract or "conference review" or editorial or erratum or letter or note or "review") |
| 40 | 38 not 39                                                                                                      |
| 41 | remove duplicates from 40                                                                                      |
| 42 | limit 41 to embase                                                                                             |

### Websites searched

Date searched: 23 April 2021

| Organisation name                                       | URL                                                                                                               |
|---------------------------------------------------------|-------------------------------------------------------------------------------------------------------------------|
| Behavioural Economics Team of the Australian Government | <a href="https://behaviouraleconomics.pmc.gov.au/">https://behaviouraleconomics.pmc.gov.au/</a>                   |
| Behavioural Insights Team                               | <a href="https://www.bi.team">https://www.bi.team</a>                                                             |
| Danish Nudging Network                                  | <a href="https://www.danishnudgingnetwork.dk/">https://www.danishnudgingnetwork.dk/</a>                           |
| iNudgeyou                                               | <a href="https://inudgeyou.com/en/">https://inudgeyou.com/en/</a>                                                 |
| Nudge France                                            | <a href="http://www.nudgefrance.org/">http://www.nudgefrance.org/</a>                                             |
| Nudge-it                                                | <a href="https://www.nudge-it.eu/">https://www.nudge-it.eu/</a>                                                   |
| Nudge Italia                                            | <a href="http://www.nudgeitalia.it/">http://www.nudgeitalia.it/</a>                                               |
| Norwegian Nudging Network                               | <a href="https://sites.google.com/view/norsk nudgenet/home">https://sites.google.com/view/norsk nudgenet/home</a> |
| Penn Medicine Nudge Unit                                | <a href="https://nudgeunit.upenn.edu">https://nudgeunit.upenn.edu</a>                                             |
| The European Nudging Network                            | <a href="http://tenudge.eu/">http://tenudge.eu/</a>                                                               |
| The Swedish Nudging Network                             | <a href="https://theswedishnudgingnetwork.com/">https://theswedishnudgingnetwork.com/</a>                         |
