# Supplementary material for: Nudge interventions to reduce unnecessary antibiotic prescribing in primary care: a systematic review
Source: PubMed Central journal article supplement — BMJ Open. 2023 Jan 18;13(1):e062688. doi: 10.1136/bmjopen-2022-062688 (PMC9853249; doi:10.1136/bmjopen-2022-062688), 2023-01-18
Supplement: bmjopen-2022-062688supp003.pdf [file bmjopen-2022-062688supp003.pdf]

Raban et al. Nudge interventions to reduce unnecessary antibiotic prescribing in primary care: a systematic review

### SUPPLEMENTARY FILE 3

Table S3: Assessment of risk of bias\* against each criterion for individual studies

| Study                                    | Random sequence generation | Allocation concealment | Baseline outcome measurements similar | Baseline characteristics similar | Incomplete outcome data | Blinding of outcome measurement assessment | Protections against contamination | Selective reporting | Other bias | TOTAL number of criteria with low risk of bias |
|------------------------------------------|----------------------------|------------------------|---------------------------------------|----------------------------------|-------------------------|--------------------------------------------|-----------------------------------|---------------------|------------|------------------------------------------------|
| Awad, 2006                               | ✓                          | ?                      | ✓                                     | ?                                | ?                       | ?                                          | ✓                                 | X                   | ✓          | 4/9                                            |
| BETA, 2018 & 2020                        | ✓                          | ✓                      | ✓                                     | ✓                                | ?                       | ✓                                          | ✓                                 | ✓                   | ✓          | 8/9                                            |
| Bradley, 2019                            | X                          | X                      | ✓                                     | ✓                                | ✓                       | ✓                                          | ✓                                 | ✓                   | ✓          | 7/9                                            |
| Chang, 2020                              | ✓                          | X                      | ✓                                     | ✓                                | ✓                       | ✓                                          | ✓                                 | ✓                   | ✓          | 8/9                                            |
| Curtis, 2021                             | ✓                          | ✓                      | ✓                                     | ✓                                | ✓                       | ✓                                          | ✓                                 | ✓                   | ✓          | 9/9                                            |
| Gerber, 2013                             | ✓                          | ✓                      | ✓                                     | ✓                                | ?                       | X                                          | ?                                 | ✓                   | ✓          | 6/9                                            |
| Hallsworth, 2016                         | ✓                          | ✓                      | ✓                                     | ✓                                | ✓                       | ✓                                          | ✓                                 | ✓                   | ✓          | 9/9                                            |
| Hemkens, 2017                            | ✓                          | ✓                      | ✓                                     | ✓                                | ✓                       | ✓                                          | ✓                                 | ✓                   | ✓          | 9/9                                            |
| Hurlimann, 2016                          | ✓                          | ✓                      | ✓                                     | ✓                                | ✓                       | X                                          | ✓                                 | ✓                   | ✓          | 8/9                                            |
| Kronman, 2020                            | ✓                          | ✓                      | ✓                                     | ✓                                | ✓                       | ✓                                          | ✓                                 | ✓                   | ✓          | 9/9                                            |
| Lagerlov, 2000                           | ✓                          | ✓                      | ✓                                     | ✓                                | X                       | ?                                          | ✓                                 | ?                   | X          | 6/9                                            |
| Mainous, 2000                            | ✓                          | ✓                      | ✓                                     | ✓                                | ✓                       | ✓                                          | ✓                                 | ✓                   | ✓          | 9/9                                            |
| Meeker, 2014                             | ✓                          | ✓                      | ✓                                     | ✓                                | ✓                       | ✓                                          | ?                                 | ✓                   | ✓          | 8/9                                            |
| Meeker, 2016                             | ✓                          | ✓                      | ?                                     | ?                                | ✓                       | ✓                                          | ✓                                 | ✓                   | X          | 6/9                                            |
| O'Connell, 1999                          | ?                          | ✓                      | ✓                                     | ✓                                | ✓                       | ✓                                          | ✓                                 | ✓                   | ✓          | 8/9                                            |
| Persell, 2016                            | ✓                          | ✓                      | ✓                                     | ?                                | ✓                       | ✓                                          | ?                                 | ✓                   | X          | 7/9                                            |
| Ratajczak, 2019                          | X                          | X                      | ✓                                     | ✓                                | ✓                       | ✓                                          | ✓                                 | ✓                   | ✓          | 7/9                                            |
| Sondergaard, 2003                        | ?                          | ✓                      | ✓                                     | ✓                                | ✓                       | ✓                                          | ✓                                 | ✓                   | ✓          | 8/9                                            |
| Yang, 2014                               | ✓                          | ✓                      | ✓                                     | ✓                                | ✓                       | ✓                                          | ✓                                 | ✓                   | ✓          | 9/9                                            |
| Number of studies with high risk of bias | 2                          | 3                      | 0                                     | 0                                | 1                       | 2                                          | 0                                 | 1                   | 3          |                                                |
| Number of studies with unclear bias      | 2                          | 1                      | 1                                     | 3                                | 3                       | 2                                          | 3                                 | 1                   | 0          |                                                |
| Number of studies with                   | 15                         | 15                     | 15                                    | 16                               | 15                      | 15                                         | 16                                | 17                  | 16         |                                                |

## Raban et al. Nudge interventions to reduce unnecessary antibiotic prescribing in primary care: a systematic review

|                  |  |  |  |  |  |  |  |  |  |  |
|------------------|--|--|--|--|--|--|--|--|--|--|
| low risk of bias |  |  |  |  |  |  |  |  |  |  |
|------------------|--|--|--|--|--|--|--|--|--|--|

'X' denotes high risk of bias for this criterion; '?' denotes unclear risk of bias; '✓' denotes low risk of bias.

\*Risk of bias assessed using the Cochrane Effective Practice and Organisation of Care group's tool ([https://epoc.cochrane.org/sites/epoc.cochrane.org/files/public/uploads/Resources-for-authors2017/suggested\\_risk\\_of\\_bias\\_criteria\\_for\\_epoc\\_reviews.pdf](https://epoc.cochrane.org/sites/epoc.cochrane.org/files/public/uploads/Resources-for-authors2017/suggested_risk_of_bias_criteria_for_epoc_reviews.pdf))
