# Supplementary material for: Nudge interventions to reduce unnecessary antibiotic prescribing in primary care: a systematic review
Source: PubMed Central journal article supplement — BMJ Open. 2023 Jan 18;13(1):e062688. doi: 10.1136/bmjopen-2022-062688 (PMC9853249; doi:10.1136/bmjopen-2022-062688), 2023-01-18
Supplement: bmjopen-2022-062688supp004.pdf [file bmjopen-2022-062688supp004.pdf]

Raban et al. Nudge interventions to reduce unnecessary antibiotic prescribing in primary care: a systematic review

#### SUPPLEMENTARY FILE 4

Table S4: Effects of nudge interventions to improve antibiotic use in primary care

| Study                                                        | Design                   | Interventions                                | Control    | Outcome/s                                                  | Follow-up period   | Reported statistics                                                                       | 95% CI, p-value                                                          | Vote counting assessment |
|--------------------------------------------------------------|--------------------------|----------------------------------------------|------------|------------------------------------------------------------|--------------------|-------------------------------------------------------------------------------------------|--------------------------------------------------------------------------|--------------------------|
| <b>Decision information – provide social reference point</b> |                          |                                              |            |                                                            |                    |                                                                                           |                                                                          |                          |
| Awad, 2006                                                   | Cluster randomised trial | Social norm feedback                         | Usual care | No. of consultations with AB prescribed                    | 3-months post      | Mean difference: -2.8                                                                     | (-1.1, -4.6), p=0.004                                                    | Reduction                |
|                                                              |                          |                                              |            | No. of consultations with an inappropriate AB <sup>a</sup> | 3-months post      | Mean difference: -1.9                                                                     | (-0.1, -3.7), p=0.040                                                    | n/a                      |
| BETA, 2018 & 2020                                            | Cluster randomised trial | Social norm feedback with graph              | Usual care | No. of ABs per 1000 consultations                          | 6 & 12months post  | Mean difference (6-months): -13.6 (~12% reduction)<br>(12-months): -9.3 (~9.4% reduction) | 6-months: (-16.6, -10.6), p<0.00001<br>12-months: (-12.3, -6.2); p<0.001 | Reduction                |
|                                                              |                          | Social norm feedback with education material | Usual care | No. of ABs per 1000 consultations                          | 6 & 12-months post | Mean difference (6-months): -10.3 (~9.3% reduction)<br>(12-months):                       | 6-months: (-13.8, -6.8), p<0.001<br>12-months: (-11, -5.6); p<0.001      | n/a                      |

## Raban et al. Nudge interventions to reduce unnecessary antibiotic prescribing in primary care: a systematic review

|               |                                               |                                               |            |                                                 |                                               |                                                                                             |                                                                           |           |
|---------------|-----------------------------------------------|-----------------------------------------------|------------|-------------------------------------------------|-----------------------------------------------|---------------------------------------------------------------------------------------------|---------------------------------------------------------------------------|-----------|
|               |                                               |                                               |            |                                                 |                                               | -8.3 (~8.4% reduction)                                                                      |                                                                           |           |
|               |                                               | Social norm feedback with delayed prescribing | Usual      | No. ABs per 1000 consultation                   | 6 & 12-months post                            | Mean difference (6-months): -11.8 (~10.7% reduction)<br>(12-months): -8.8 (~8.9% reduction) | 6 months: (-14.7, -8.9); p<0.001<br><br>12-months: (-11.6, -6.0); p<0.001 | n/a       |
| Bradley, 2019 | Regression discontinuity study                | Social norm feedback                          | Usual care | No. of ABs per 1000 registered population       | 3-months post                                 | Mean difference: -25.7                                                                      | (-42.5, -8.8), p=0.0028                                                   | Reduction |
|               |                                               |                                               |            |                                                 | 12-months post                                | Mean difference: -58.7 (~5% reduction)                                                      | (-116.7, -0.7), p=0.047                                                   | n/a       |
| Chang, 2020   | Cluster randomised crossover-controlled trial | Social norm feedback                          | Usual care | No. of AB prescriptions per total prescriptions | 3-month intervention period                   | Relative reduction in intervention arm: 35.2%; in control arm: 30.8%                        | p<0.001                                                                   | Reduction |
|               |                                               |                                               |            |                                                 | 3-month intervention period (after crossover) | Relative reduction in intervention arm: 14.2%; in control arm: 4.6%                         | p<0.001                                                                   | n/a       |

## Raban et al. Nudge interventions to reduce unnecessary antibiotic prescribing in primary care: a systematic review

|                  |                          |                                  |            |                                                                   |                                   |                                           |                          |           |
|------------------|--------------------------|----------------------------------|------------|-------------------------------------------------------------------|-----------------------------------|-------------------------------------------|--------------------------|-----------|
| Curtis, 2021     | Randomised trial         | Social norm feedback (standard)  | Usual care | AB prescriptions per 1000 population                              | 6-months post                     | No change                                 | NS                       | No change |
|                  |                          |                                  |            | Proportion of antibiotics which were broad spectrum               | 6-months post                     | 2.1% reduction compared to controls       | p=0.104                  | n/a       |
|                  |                          | Social norm feedback (optimised) | Usual care | AB prescriptions per 1000 population                              | 6-months post                     | No change                                 | NS                       | No change |
|                  |                          |                                  |            | Proportion of antibiotics which were broad spectrum               | 6-months post                     | 2.1% reduction compared to controls       | P=0.046                  | n/a       |
| Gerber, 2013     | Cluster randomised trial | Social norm feedback             | Usual care | ABs for viral RTI                                                 | 12-month intervention period      | DID: -1.7%                                | NR, p=0.93               | Reduction |
|                  |                          |                                  |            | Percent of broad spectrum ABs among children with AB prescription | 12-month intervention period      | DID: -6.7%                                | NR, p=0.01               | n/a       |
| Hallsworth, 2016 | Randomised trial         | Social norm feedback             | Usual care | No. of ABs per 1000 registered population                         | 6-months post                     | IRR: 0.967 <sup>b</sup> (~3.3% reduction) | (0.957, 0.977), p<0.0001 | Reduction |
| Hemkens, 2017    | Randomised trial         | Social norm feedback             | Usual care | DDD per 1000 consultations                                        | First 1-year intervention period  | Between group difference: 0.81%           | (-2.56, 4.30), NR        | No change |
|                  |                          |                                  |            |                                                                   | Second 1-year intervention period | Between group difference: -1.73%          | (-5.07, 1.72%), p=0.32   |           |

## Raban et al. Nudge interventions to reduce unnecessary antibiotic prescribing in primary care: a systematic review

|                 |                                        |                                                      |                                        |                                                     |                              |                                                         |                       |           |
|-----------------|----------------------------------------|------------------------------------------------------|----------------------------------------|-----------------------------------------------------|------------------------------|---------------------------------------------------------|-----------------------|-----------|
| Hurlimann, 2016 | Cluster randomised trial               | Social norm feedback                                 | Usual care                             | Percentage of AB prescriptions for upper RTIs       | 24-month intervention period | Difference in proportion: -1.2                          | (-10.5, -8.2), p=0.66 | No change |
|                 |                                        |                                                      |                                        | Percentage of penicillins for RTI                   | 24-month intervention period | OR: 1.42                                                | (1.08-1.89), p=0.01   | n/a       |
|                 |                                        |                                                      |                                        | Percentage of trimethoprim/sulfamethoxazole for UTI | 24-month intervention period | OR: 2.16                                                | (1.19-3.91), p=0.01   | n/a       |
| Kronman, 2020   | Stepped wedge cluster randomised trial | Social norm feedback                                 | Usual care                             | Percentage of RTI with antibiotic prescription      | 12-months                    | OR: 0.93                                                | (0.90, 0.96), NR      | Reduction |
| Lagerlov, 2000  | Randomised trial                       | Social norm feedback                                 | Intervention for asthma care           | Percentage of inappropriate ABs for UTI             | 12-months post               | Relative decrease: -9.6%                                | NR, p=0.0004          | Reduction |
| Mainous, 2000   | Randomised trial                       | Social norm feedback                                 | Usual care                             | Mean proportion of inappropriate AB treatments      | 5-months post                | NR                                                      | Not significant       | -         |
|                 |                                        | Social norm feedback with patient education material | Usual care                             | Mean proportion of inappropriate AB treatments      | 5-months post                | Dunnett's T: 2.374                                      | NR, p<0.05            | Reduction |
| Meeker, 2016    | Cluster randomised trial               | Social norm feedback                                 | Usual care                             | No. of ABs per 100 AB inappropriate RTIs            | 18-month intervention period | DID: -5.2%                                              | (-6.9, -1.6), p<0.01  | Reduction |
| O'Connell, 1999 | Randomised trial                       | Social norm feedback                                 | Interventions for other medication use | No. of AB prescriptions per 100 consultations       | 4-months post                | Median: no difference between intervention and controls | NR                    | No change |

## Raban et al. Nudge interventions to reduce unnecessary antibiotic prescribing in primary care: a systematic review

|                                                        |                                |                           |            |                                                          |                              |                                              |                         |           |
|--------------------------------------------------------|--------------------------------|---------------------------|------------|----------------------------------------------------------|------------------------------|----------------------------------------------|-------------------------|-----------|
| Persell, 2016                                          | Randomised trial               | Social norm feedback      | Usual care | No. of ABs per 100 RTIs                                  | 12-month intervention period | OR: 0.73                                     | (0.53, 0.995), p<0.05   | Reduction |
|                                                        |                                |                           |            | No. of ABs per 100 AB inappropriate RTIs                 | 12-month intervention period | OR: 0.45                                     | (0.18, 1.11), NR        | n/a       |
| Ratajczak, 2019                                        | Regression discontinuity study | Social norm feedback      | Usual care | No. of ABs per 1000 registered population                | 6-months post                | Percent change in intervention group: -3.69% | (-5.10, -2.29), p<0.001 | Reduction |
| Sondergaard, 2003                                      | Randomised trial               | Social norm feedback      | Guidelines | No. of ABs per 1000 registered patients                  | 3-months post                | Mean difference: -0.6                        | (-2.8, 1.6), NR         | Reduction |
|                                                        |                                |                           |            | Percent of prescriptions for narrow-spectrum penicillins | 3-months post                | Mean difference: 0.7                         | (-0.41, 1.7), NR        | n/a       |
| <b>Decision structure – change option consequences</b> |                                |                           |            |                                                          |                              |                                              |                         |           |
| Meeker, 2016                                           | Cluster randomised trial       | Accountable justification | Usual care | No. of ABs per 100 AB inappropriate RTIs                 | 18-month intervention period | DID: -7.0%                                   | (-9.1, -2.9), p<0.001   | Reduction |
| Persell, 2016                                          | Randomised trial               | Accountable justification | Usual care | No. of ABs per 100 RTIs                                  | 12-month intervention period | OR: 1.05                                     | (0.80, 1.39), NR        | No change |
|                                                        |                                |                           |            | No. of ABs per 100 AB inappropriate RTIs                 | 12-month intervention period | OR: 0.98                                     | (0.42, 2.29), NR        | n/a       |
| Yang, 2014                                             | Cluster randomised trial       | Public reporting          | Education  | Percentage of RTI consultations with AB                  | 5-8 months post              | DID: -1.93                                   | (-6.61, 2.75), p=0.419  | Reduction |
|                                                        |                                |                           |            | Percentage of RTI consultations with >1 AB               | 5-8 months post              | DID: -6.97                                   | (-13.94, 0.00), p=0.049 | n/a       |

Raban et al. Nudge interventions to reduce unnecessary antibiotic prescribing in primary care: a systematic review

| Decision assistance – provide reminders     |                          |                        |            |                                          |                              |             |                        |           |
|---------------------------------------------|--------------------------|------------------------|------------|------------------------------------------|------------------------------|-------------|------------------------|-----------|
| Meeker, 2016                                | Cluster randomised trial | Suggested alternatives | Usual care | No. of ABs per 100 AB inappropriate RTIs | 18-month intervention period | DID: -5.0%  | (-7.8, 0.1%), p=0.66   | Reduction |
| Persell, 2016                               | Randomised trial         | Suggested alternatives | Usual care | No. of ABs per 100 RTIs                  | 12-month intervention period | OR: 0.72    | (0.54, 0.96), p<0.01   | Reduction |
|                                             |                          |                        |            | No. of ABs per 100 AB inappropriate RTIs | 12-month intervention period | OR: 0.68    | (0.29, 1.58), NR       | n/a       |
| Decision assistance – facilitate commitment |                          |                        |            |                                          |                              |             |                        |           |
| Meeker, 2014                                | Randomised trial         | Public commitment      |            | No. of ABs per 100 AB inappropriate RTIs | 12-week intervention period  | DID: -19.7% | (-5.8, -33.04), p=0.02 | Reduction |

No. is 'number'. AB is 'antibiotic'. CI is 'confidence interval'. IRR is 'incidence rate ratio'. DDD is 'defined daily doses'. OR is odds ratio. RTI is 'respiratory tract infection'. UTI is 'urinary tract infection'. DID is 'difference in differences analysis'. NR is not reported. NS is 'not significant'.

\*The intervention promise was assessed based on all antibiotic outcomes reported in each study.

<sup>a</sup>Inappropriate with respect to antibiotic, doses and/or duration.
